# Supplementary material for: Stereoselective syntheses of 3-aminocyclooctanetriols and halocyclooctanetriols
Source: publisher site journal article supplement (doi:10.3762/bjoc.17.59), 2021-03-11

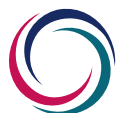

## Supporting Information

for

### **Stereoselective syntheses of 3-aminocyclooctanetriols and halocyclooctanetriols**

Emine Salamci and Yunus Zozik

*Beilstein J. Org. Chem.* **2021**, *17*, 705–710. doi:10.3762/bjoc.17.59

**Experimental section,  $^1\text{H}$  and  $^{13}\text{C}$  NMR spectra for all new compounds, as well as selected 2D NMR spectra**

## Table of Contents

|                                                                                                                                                                                                                                                                              |     |
|------------------------------------------------------------------------------------------------------------------------------------------------------------------------------------------------------------------------------------------------------------------------------|-----|
| <b>A. Experimental section</b> .....                                                                                                                                                                                                                                         | S3  |
| General information .....                                                                                                                                                                                                                                                    | S3  |
| (2 <i>s</i> ,3 <i>aR</i> ( <i>S</i> ),4 <i>S</i> ( <i>R</i> ),9 <i>R</i> ( <i>S</i> ),9 <i>aS</i> ( <i>R</i> ))-2-oxidoctahydrocycloocta[ <i>d</i> ][1,3,2]dioxathiole-4,9-diyl diacetate ( <b>8</b> ) .....                                                                 | S3  |
| (3 <i>aR</i> ( <i>S</i> ),4 <i>S</i> ( <i>R</i> ),9 <i>R</i> ( <i>S</i> ),9 <i>aS</i> ( <i>R</i> ))-2,2-dioxidoctahydrocycloocta[ <i>d</i> ][1,3,2]dioxathiole-4,9-diyl diacetate ( <b>9</b> ) .....                                                                         | S3  |
| (1 <i>S</i> ( <i>R</i> ),2 <i>S</i> ( <i>R</i> ),3 <i>R</i> ( <i>S</i> ),4 <i>R</i> ( <i>S</i> ))-3-azidocyclooctane-1,2,4-triol ( <b>10</b> ) .....                                                                                                                         | S4  |
| (1 <i>S</i> ( <i>R</i> ),2 <i>S</i> ( <i>R</i> ),3 <i>R</i> ( <i>S</i> ),4 <i>R</i> ( <i>S</i> ))-3-azidocyclooctane-1,2,4-triyl triacetate ( <b>11</b> ). General Procedure for the Acetylation of Hydroxyl Groups .....                                                    | S4  |
| (1 <i>S</i> ( <i>R</i> ),2 <i>S</i> ( <i>R</i> ),3 <i>R</i> ( <i>S</i> ),4 <i>R</i> ( <i>S</i> ))-3-aminocyclooctane-1,2,4-triol ( <b>12</b> ). General Procedure for Hydrogenation.....                                                                                     | S5  |
| (1 <i>R</i> ( <i>S</i> ),2 <i>S</i> ( <i>R</i> ),7 <i>R</i> ( <i>S</i> ),8 <i>S</i> ( <i>R</i> ))-9-oxabicyclo[6.1.0]nonane-2,7-diol ( <b>13</b> ) .....                                                                                                                     | S5  |
| (1 <i>S</i> ( <i>R</i> ),2 <i>R</i> ( <i>S</i> ),3 <i>R</i> ( <i>S</i> ),4 <i>R</i> ( <i>S</i> ))-3-bromocyclooctane-1,2,4-triol ( <b>14</b> ) .....                                                                                                                         | S5  |
| (1 <i>S</i> ( <i>R</i> ),2 <i>R</i> ( <i>S</i> ),3 <i>R</i> ( <i>S</i> ),4 <i>R</i> ( <i>S</i> ))-3-bromocyclooctane-1,2,4-triyl triacetate ( <b>15</b> ) .....                                                                                                              | S6  |
| (1 <i>S</i> ( <i>R</i> ),2 <i>S</i> ( <i>R</i> ),3 <i>S</i> ( <i>R</i> ),4 <i>R</i> ( <i>S</i> ))-3-azidocyclooctane-1,2,4-triol ( <b>16</b> ) .....                                                                                                                         | S6  |
| (1 <i>S</i> ( <i>R</i> ),2 <i>S</i> ( <i>R</i> ),3 <i>S</i> ( <i>R</i> ),4 <i>R</i> ( <i>S</i> ))-3-azidocyclooctane-1,2,4-triyl triacetate ( <b>17</b> ).....                                                                                                               | S6  |
| (1 <i>S</i> ( <i>R</i> ),2 <i>S</i> ( <i>R</i> ),3 <i>S</i> ( <i>R</i> ),4 <i>R</i> ( <i>S</i> ))-3-aminocyclooctane-1,2,4-triol ( <b>18</b> ) .....                                                                                                                         | S7  |
| (1 <i>S</i> ( <i>R</i> ),2 <i>R</i> ( <i>S</i> ),3 <i>R</i> ( <i>S</i> ),4 <i>R</i> ( <i>S</i> ))-3-chlorocyclooctane-1,2,4-triol ( <b>19</b> ) .....                                                                                                                        | S7  |
| (1 <i>S</i> ( <i>R</i> ),2 <i>R</i> ( <i>S</i> ),3 <i>R</i> ( <i>S</i> ),4 <i>R</i> ( <i>S</i> ))-3-chlorocyclooctane-1,2,4-triyl triacetate ( <b>20</b> ) .....                                                                                                             | S7  |
| Acetylation and reaction of epoxy-diol <b>22</b> with HCl(g)-MeOH.....                                                                                                                                                                                                       | S8  |
| (1 <i>S</i> ( <i>R</i> ),2 <i>S</i> ( <i>R</i> ),3 <i>R</i> ( <i>S</i> ),4 <i>R</i> ( <i>S</i> ))-4-chlorocyclooctane-1,2,3-triyl triacetate ( <b>25</b> ) .....                                                                                                             | S8  |
| (1 <i>S</i> ( <i>R</i> ),2 <i>S</i> ( <i>R</i> ),3 <i>R</i> ( <i>S</i> ),4 <i>S</i> ( <i>R</i> ))-3-chlorocyclooctane-1,2,4-triyl triacetate ( <b>26</b> ) .....                                                                                                             | S8  |
| (1 <i>R</i> ( <i>S</i> ),2 <i>R</i> ( <i>S</i> ),3 <i>S</i> ( <i>R</i> ),4 <i>S</i> ( <i>R</i> ))-4-chlorocyclooctane-1,2,3-triol ( <b>23</b> ) .....                                                                                                                        | S9  |
| (1 <i>R</i> ( <i>S</i> ),2 <i>R</i> ( <i>S</i> ),3 <i>S</i> ( <i>R</i> ),4 <i>R</i> ( <i>S</i> ))-3-chlorocyclooctane-1,2,4-triol ( <b>24</b> ) .....                                                                                                                        | S9  |
| References .....                                                                                                                                                                                                                                                             | S9  |
| <b>B. NMR Spectra</b> .....                                                                                                                                                                                                                                                  | S10 |
| (2 <i>s</i> ,3 <i>aR</i> ( <i>S</i> ),4 <i>S</i> ( <i>R</i> ),9 <i>R</i> ( <i>S</i> ),9 <i>aS</i> ( <i>R</i> ))-2-oxidoctahydrocycloocta[ <i>d</i> ][1,3,2]dioxathiole-4,9-diyl diacetate ( <b>8</b> ): CDCl <sub>3</sub> ( <sup>1</sup> H NMR and <sup>13</sup> C NMR)..... | S10 |
| (2 <i>s</i> ,3 <i>aR</i> ( <i>S</i> ),4 <i>S</i> ( <i>R</i> ),9 <i>R</i> ( <i>S</i> ),9 <i>aS</i> ( <i>R</i> ))-2-oxidoctahydrocycloocta[ <i>d</i> ][1,3,2]dioxathiole-4,9-diyl diacetate ( <b>8</b> ): CDCl <sub>3</sub> -HMQC.....                                         | S11 |
| (2 <i>s</i> ,3 <i>aR</i> ( <i>S</i> ),4 <i>S</i> ( <i>R</i> ),9 <i>R</i> ( <i>S</i> ),9 <i>aS</i> ( <i>R</i> ))-2-oxidoctahydrocycloocta[ <i>d</i> ][1,3,2]dioxathiole-4,9-diyl diacetate ( <b>8</b> ):CDCl <sub>3</sub> -COSY.....                                          | S12 |
| (3 <i>aR</i> ( <i>S</i> ),4 <i>S</i> ( <i>R</i> ),9 <i>R</i> ( <i>S</i> ),9 <i>aS</i> ( <i>R</i> ))-2,2-dioxidoctahydrocycloocta[ <i>d</i> ][1,3,2]dioxathiole-4,9-diyl diacetate ( <b>9</b> ): CDCl <sub>3</sub> ( <sup>1</sup> H NMR and <sup>13</sup> C NMR).....         | S13 |

|                                                                                                                                                                                                                                   |     |
|-----------------------------------------------------------------------------------------------------------------------------------------------------------------------------------------------------------------------------------|-----|
| 1 <i>S</i> ( <i>R</i> ),2 <i>S</i> ( <i>R</i> ),3 <i>R</i> ( <i>S</i> ),4 <i>R</i> ( <i>S</i> ))-3-azidocyclooctane-1,2,4-triol ( <b>10</b> ): D <sub>2</sub> O ( <sup>1</sup> H NMR and <sup>13</sup> C NMR) .....               | S14 |
| (1 <i>S</i> ( <i>R</i> ),2 <i>S</i> ( <i>R</i> ),3 <i>R</i> ( <i>S</i> ),4 <i>R</i> ( <i>S</i> ))-3-azidocyclooctane-1,2,4-triyl triacetate ( <b>11</b> ): CDCl <sub>3</sub> ( <sup>1</sup> H NMR and Double Resonance) .....     | S15 |
| (1 <i>S</i> ( <i>R</i> ),2 <i>S</i> ( <i>R</i> ),3 <i>R</i> ( <i>S</i> ),4 <i>R</i> ( <i>S</i> ))-3-azidocyclooctane-1,2,4-triyl triacetate ( <b>11</b> ): CDCl <sub>3</sub> ( <sup>13</sup> C NMR) .....                         | S16 |
| (1 <i>S</i> ( <i>R</i> ),2 <i>S</i> ( <i>R</i> ),3 <i>R</i> ( <i>S</i> ),4 <i>R</i> ( <i>S</i> ))-3-azidocyclooctane-1,2,4-triyl triacetate ( <b>11</b> ): NOE-Dif spectra .....                                                  | S17 |
| (1 <i>S</i> ( <i>R</i> ),2 <i>S</i> ( <i>R</i> ),3 <i>R</i> ( <i>S</i> ),4 <i>R</i> ( <i>S</i> ))-3-azidocyclooctane-1,2,4-triyl triacetate ( <b>11</b> ): HMQC .....                                                             | S19 |
| (1 <i>S</i> ( <i>R</i> ),2 <i>S</i> ( <i>R</i> ),3 <i>R</i> ( <i>S</i> ),4 <i>R</i> ( <i>S</i> ))-3-azidocyclooctane-1,2,4-triyl triacetate ( <b>11</b> ): COSY .....                                                             | S20 |
| (1 <i>S</i> ( <i>R</i> ),2 <i>S</i> ( <i>R</i> ),3 <i>R</i> ( <i>S</i> ),4 <i>R</i> ( <i>S</i> ))-3-aminocyclooctane-1,2,4-triol ( <b>12</b> ): CD <sub>3</sub> OD ( <sup>1</sup> H NMR and <sup>13</sup> C NMR) .....            | S21 |
| (1 <i>S</i> ( <i>R</i> ),2 <i>R</i> ( <i>S</i> ),3 <i>R</i> ( <i>S</i> ),4 <i>R</i> ( <i>S</i> ))-3-bromocyclooctane-1,2,4-triol ( <b>14</b> ): CD <sub>3</sub> OD ( <sup>1</sup> H NMR and <sup>13</sup> C NMR) ....             | S22 |
| (1 <i>S</i> ( <i>R</i> ),2 <i>R</i> ( <i>S</i> ),3 <i>R</i> ( <i>S</i> ),4 <i>R</i> ( <i>S</i> ))-3-bromocyclooctane-1,2,4-triyl triacetate ( <b>15</b> ): CDCl <sub>3</sub> ( <sup>1</sup> H NMR and Double Resonance) .....     | S23 |
| (1 <i>S</i> ( <i>R</i> ),2 <i>R</i> ( <i>S</i> ),3 <i>R</i> ( <i>S</i> ),4 <i>R</i> ( <i>S</i> ))-3-bromocyclooctane-1,2,4-triyl triacetate ( <b>15</b> ): CDCl <sub>3</sub> ( <sup>13</sup> C NMR) .....                         | S24 |
| (1 <i>S</i> ( <i>R</i> ),2 <i>S</i> ( <i>R</i> ),3 <i>S</i> ( <i>R</i> ),4 <i>R</i> ( <i>S</i> ))-3-azidocyclooctane-1,2,4-triol ( <b>16</b> ): D <sub>2</sub> O ( <sup>1</sup> H NMR and <sup>13</sup> C NMR) .....              | S25 |
| (1 <i>S</i> ( <i>R</i> ),2 <i>S</i> ( <i>R</i> ),3 <i>S</i> ( <i>R</i> ),4 <i>R</i> ( <i>S</i> ))-3-azidocyclooctane-1,2,4-triyl triacetate ( <b>17</b> ): CDCl <sub>3</sub> ( <sup>1</sup> H NMR and Double Resonance) .....     | S26 |
| (1 <i>S</i> ( <i>R</i> ),2 <i>S</i> ( <i>R</i> ),3 <i>S</i> ( <i>R</i> ),4 <i>R</i> ( <i>S</i> ))-3-azidocyclooctane-1,2,4-triyl triacetate ( <b>17</b> ): CDCl <sub>3</sub> ( <sup>13</sup> C NMR) .....                         | S27 |
| (1 <i>S</i> ( <i>R</i> ),2 <i>S</i> ( <i>R</i> ),3 <i>S</i> ( <i>R</i> ),4 <i>R</i> ( <i>S</i> ))-3-azidocyclooctane-1,2,4-triyl triacetate ( <b>17</b> ): CDCl <sub>3</sub> -HMQC .....                                          | S28 |
| (1 <i>S</i> ( <i>R</i> ),2 <i>S</i> ( <i>R</i> ),3 <i>S</i> ( <i>R</i> ),4 <i>R</i> ( <i>S</i> ))-3-azidocyclooctane-1,2,4-triyl triacetate ( <b>17</b> ): CDCl <sub>3</sub> -COSY .....                                          | S29 |
| (1 <i>S</i> ( <i>R</i> ),2 <i>S</i> ( <i>R</i> ),3 <i>S</i> ( <i>R</i> ),4 <i>R</i> ( <i>S</i> ))-3-aminocyclooctane-1,2,4-triol ( <b>18</b> ): D <sub>2</sub> O ( <sup>1</sup> H NMR and <sup>13</sup> C NMR) .....              | S30 |
| (1 <i>S</i> ( <i>R</i> ),2 <i>R</i> ( <i>S</i> ),3 <i>R</i> ( <i>S</i> ),4 <i>R</i> ( <i>S</i> ))-3-chlorocyclooctane-1,2,4-triol ( <b>19</b> ): D <sub>2</sub> O ( <sup>1</sup> H NMR and <sup>13</sup> C NMR) .....             | S31 |
| (1 <i>S</i> ( <i>R</i> ),2 <i>R</i> ( <i>S</i> ),3 <i>R</i> ( <i>S</i> ),4 <i>R</i> ( <i>S</i> ))-3-chlorocyclooctane-1,2,4-triyl triacetate ( <b>20</b> ): CDCl <sub>3</sub> ( <sup>1</sup> H NMR and Double Resonance) .....    | S32 |
| (1 <i>S</i> ( <i>R</i> ),2 <i>R</i> ( <i>S</i> ),3 <i>R</i> ( <i>S</i> ),4 <i>R</i> ( <i>S</i> ))-3-chlorocyclooctane-1,2,4-triyl triacetate ( <b>20</b> ): CDCl <sub>3</sub> ( <sup>13</sup> C NMR) .....                        | S33 |
| (1 <i>S</i> ( <i>R</i> ),2 <i>R</i> ( <i>S</i> ),3 <i>R</i> ( <i>S</i> ),4 <i>R</i> ( <i>S</i> ))-3-chlorocyclooctane-1,2,4-triyl triacetate ( <b>20</b> ): CDCl <sub>3</sub> -HMQC .....                                         | S34 |
| 1 <i>S</i> ( <i>R</i> ),2 <i>R</i> ( <i>S</i> ),3 <i>R</i> ( <i>S</i> ),4 <i>R</i> ( <i>S</i> ))-3-chlorocyclooctane-1,2,4-triyl triacetate ( <b>20</b> ): CDCl <sub>3</sub> -COSY .....                                          | S35 |
| (1 <i>R</i> ( <i>S</i> ),2 <i>R</i> ( <i>S</i> ),3 <i>S</i> ( <i>R</i> ),4 <i>S</i> ( <i>R</i> ))-4-chlorocyclooctane-1,2,3-triol ( <b>23</b> ): D <sub>2</sub> O ( <sup>1</sup> H NMR and <sup>13</sup> C NMR) .....             | S36 |
| (1 <i>R</i> ( <i>S</i> ),2 <i>R</i> ( <i>S</i> ),3 <i>S</i> ( <i>R</i> ),4 <i>R</i> ( <i>S</i> ))-3-chlorocyclooctane-1,2,4-triol ( <b>24</b> ): D <sub>2</sub> O ( <sup>1</sup> H NMR and <sup>13</sup> C NMR) .....             | S37 |
| (1 <i>R</i> ( <i>S</i> ),2 <i>R</i> ( <i>S</i> ),3 <i>S</i> ( <i>R</i> ),4 <i>S</i> ( <i>R</i> ))-4-chlorocyclooctane-1,2,3-triyl triacetate ( <b>25</b> ): CDCl <sub>3</sub> ( <sup>1</sup> H NMR and <sup>13</sup> C NMR) ..... | S38 |
| 1 <i>R</i> ( <i>S</i> ),2 <i>R</i> ( <i>S</i> ),3 <i>S</i> ( <i>R</i> ),4 <i>S</i> ( <i>R</i> ))-4-chlorocyclooctane-1,2,3-triyl triacetate ( <b>25</b> ): CDCl <sub>3</sub> -HMQC .....                                          | S39 |
| (1 <i>R</i> ( <i>S</i> ),2 <i>R</i> ( <i>S</i> ),3 <i>S</i> ( <i>R</i> ),4 <i>S</i> ( <i>R</i> ))-4-chlorocyclooctane-1,2,3-triyl triacetate ( <b>25</b> ): CDCl <sub>3</sub> -COSY .....                                         | S40 |
| (1 <i>R</i> ( <i>S</i> ),2 <i>R</i> ( <i>S</i> ),3 <i>S</i> ( <i>R</i> ),4 <i>R</i> ( <i>S</i> ))-3-chlorocyclooctane-1,2,4-triyl triacetate ( <b>26</b> ): CDCl <sub>3</sub> ( <sup>1</sup> H NMR and <sup>13</sup> C NMR) ..... | S41 |
| (1 <i>R</i> ( <i>S</i> ),2 <i>R</i> ( <i>S</i> ),3 <i>S</i> ( <i>R</i> ),4 <i>R</i> ( <i>S</i> ))-3-chlorocyclooctane-1,2,4-triyl triacetate ( <b>26</b> ): CDCl <sub>3</sub> -HMQC .....                                         | S42 |
| (1 <i>R</i> ( <i>S</i> ),2 <i>R</i> ( <i>S</i> ),3 <i>S</i> ( <i>R</i> ),4 <i>R</i> ( <i>S</i> ))-3-chlorocyclooctane-1,2,4-triyl triacetate ( <b>26</b> ): CDCl <sub>3</sub> -COSY .....                                         | S43 |

## A. Experimental section

### General information

Melting points are uncorrected. Infrared spectra were obtained from solution in 0.1 mm cells or KBr pellets on an FTIR Mattson 1000 instrument. The  $^1\text{H}$  and  $^{13}\text{C}$  NMR spectra were recorded on 400 (100) MHz Varian or 400 (100) MHz Bruker spectrometer and are reported in  $\delta$  units with  $\text{SiMe}_4$  as internal standard. Elemental analyses were carried out on a LECO's CHNS-932 instrument. Melting points were determined on a Gallenkamp MPD 350. Column chromatography was performed on silica gel (60 mesh, Merck). TLC was carried out on Merck 0.2 mm silica gel 60 F<sub>254</sub> analytical aluminium plates.

**7,8-Dioxabicyclo[4.2.2]dec-9-ene (5), *cis*-2-cyclooctene-1,4-diol (6a), *cis*-1,4-diacetoxy-2-cyclooctene (6b) and (1*R*(*S*),2*R*(*S*),3*S*(*R*),4*S*(*R*))-2,3-dihydroxycyclooctane-1,4-diyl diacetate (7)** were prepared as described in the literature [1].

**(2*s*,3*aR*(*S*),4*S*(*R*),9*R*(*S*),9*aS*(*R*))-2-Oxidooctahydrocycloocta[*d*][1,3,2]dioxathiole-4,9-diyl diacetate (8):** To a cooled (at 0 °C), magnetically stirred solution of diacetate diol **7** (1.60 g, 6.15 mmol) and pyridine (1.46 g, 18.51 mmol) in  $\text{CH}_2\text{Cl}_2$  (20 mL) was added a dichloromethane solution (5 mL) of thionyl chloride (2.20 g, 18.51 mmol) dropwise over a period of 10 min. Stirring was continued for 2 h at 0 °C and stirred at room temperature for 19 h (the reaction was followed by TLC). To the reaction mixture was added water (25 mL) and extracted with ethyl acetate (4  $\times$  30 mL). The combined organic extracts were washed with 1 N HCl solution (50 mL) and saturated  $\text{NaHCO}_3$  solution (20 mL) and NaCl solution (20 mL). The organic solution was dried over  $\text{Na}_2\text{SO}_4$ . Evaporation of the solvents gave pure **8** (1.79 g, 95%). Sulfite **8** was recrystallized from  $\text{CH}_2\text{Cl}_2/n$ -hexane (9:1) as a colourless crystal; mp 146-147 °C.  $^1\text{H}$ -NMR (400 MHz,  $\text{CDCl}_3$ ):  $\delta$  5.30-5.20 (m, 2H, CH-OAc), 5.00-4.93 (m, 2H, CH-SO<sub>3</sub>), 2.07 (s, 6H, 2xOAc), 2.06-1.48 (series of m, 8H, CH<sub>2</sub>).  $^{13}\text{C}$ -NMR (100 MHz,  $\text{CDCl}_3$ ):  $\delta$  170.1, 82.2, 69.6, 32.3, 22.6, 21.2; IR (KBr,  $\text{cm}^{-1}$ ): 2951, 2877, 1744, 1465, 1451, 1429, 1374, 1323, 1235, 1205, 1029, 996, 969, 955. Anal. Calcd for  $\text{C}_{12}\text{H}_{18}\text{O}_7\text{S}$  (306.08): C 47.05; H 5.92; S 10.47; found C 46.89; H 5.81; S 10.47.

**(3*aR*(*S*),4*S*(*R*),9*R*(*S*),9*aS*(*R*))-2,2-Dioxidooctahydrocycloocta[*d*][1,3,2]dioxathiole-4,9-diyl diacetate (9):** The sulfite **8** (1.81 g, 5.91 mmol) was dissolved in  $\text{CCl}_4$  (20 mL). To mixture

was added NaIO<sub>4</sub> (1.90 g, 8.88 mmol) and acetonitrile (20 mL) and water (20 mL) and RuCl<sub>3</sub>·3H<sub>2</sub>O (15 mg). The reaction mixture was stirred 2.5 h at room temperature. The mixture was extracted with ethyl acetate (4 × 30 mL). The organic solution was dried over Na<sub>2</sub>SO<sub>4</sub>. Evaporation of the solvents gave pure **9** (1.80 g, 95%). Sulfate **9** was recrystallized from CH<sub>2</sub>Cl<sub>2</sub>/*n*-hexane (9:1) as a colourless crystal; mp 130-131 °C. <sup>1</sup>H-NMR (400 MHz, CDCl<sub>3</sub>): δ 5.52-5.41 (m, 2H, CH-OAc), 5.12-5.05 (m, 2H, CH-SO<sub>4</sub>), 2.09 (s, 6H, 2xOAc), 2.09-1.46 (series of m, 8H, CH<sub>2</sub>). <sup>13</sup>C-NMR (100 MHz, CDCl<sub>3</sub>): δ 169.6, 84.5, 69.5, 31.4, 22.6, 21.1; IR (KBr, cm<sup>-1</sup>): 2950, 2900, 1753, 1477, 1390, 1232, 1106, 1030, 957. Anal. Calcd for C<sub>12</sub>H<sub>18</sub>O<sub>8</sub>S (322.07): C 44.72; H 5.63; S 9.95; found C 44.91; H 5.48; S 10.04.

**(1S(R),2S(R),3R(S),4R(S))-3-Azidocyclooctane-1,2,4-triol (10):** A mixture of the sulfate **9** (1.00 g, 3.10 mmol) and NaN<sub>3</sub> (1.00 g, 15.38 mmol) in absolute DMF (10 mL) was stirred under nitrogen for 24 h at 80 °C. The mixture was cooled to room temperature and THF (20 mL) was added. Then concentrated H<sub>2</sub>SO<sub>4</sub> (4 drops) and water (4 drops) were added to the stirred suspension. After 40 min NaHCO<sub>3</sub> (400 mg) was added and the reaction mixture was stirred for 40 min. Filtration through a Celite and silica gel bed and concentration of the filtrate under reduced pressure provided a viscous oil. Column chromatography (silica gel, 100 g) eluting with MeOH/CH<sub>2</sub>Cl<sub>2</sub> (3:97) gave azidosulfate diacetate (0.8 g, 70%) as a white solid. Absolute methanol (10 mL) containing 20% HCl gas was added into the azidosulfate diacetate (220 mg, 0.60 mmol). The mixture was stirred at room temperature for 2.5 h. Evaporation of solvent gave 118 mg (97% yield) of azidotriol **10** as a colourless oil. <sup>1</sup>H-NMR (400 MHz, D<sub>2</sub>O): δ 4.07 (dt, *J* = 8.7, 2.3 Hz, 1H, H-4), 3.68-3.59 (m, 2H, H-1 and H-2), 3.59-3.52 (m, 1H, H-3), 1.90-1.30 (series of m, 8H, CH<sub>2</sub>). <sup>13</sup>C-NMR (100 MHz, D<sub>2</sub>O): δ 73.4, 72.1, 70.0, 69.8, 31.8, 30.7, 23.6, 20.5; IR (KBr, cm<sup>-1</sup>): 3407, 2934, 1420, 1365, 1264, 1230, 1068, 1038, 959.

Anal. Calcd for C<sub>8</sub>H<sub>15</sub>N<sub>3</sub>O<sub>3</sub> (201.11): C 47.75; H 7.51; N 20.88; found C 47.76; H 7.35; N 20.71.

**(1S(R),2S(R),3R(S),4R(S))-3-Azidocyclooctane-1,2,4-triyl triacetate (11). General procedure for the acetylation of hydroxyl groups:** In a similar manner as described in the literature [2], the azidotriol **10** (280 mg, 1.39 mmol) was dissolved in anhydrous pyridine (3 mL) and the solution was cooled 0 °C. Ac<sub>2</sub>O (0.7 mL, 8.35 mmol) and 4-(dimethylamino)pyridine (DMAP) (2.8 mg) were added and the solution was stirred for 2.5 day at room temperature. The mixture was cooled to 0 °C and 2 N HCl (70 mL) solution was

added. The mixture was extracted with ether ( $6 \times 30$  mL). The combined organic extracts were washed with saturated  $\text{NaHCO}_3$  solution (70 mL) and water ( $3 \times 10$  mL) and then dried ( $\text{Na}_2\text{SO}_4$ ). After evaporation of solvent, chromatography of the mixture on a silica gel column eluting with  $\text{EtOAc}/n\text{-hexane}$  (3:97) gave 350 mg (76%) of triacetate **11** as a colourless oil.  $^1\text{H-NMR}$  (400 MHz,  $\text{CDCl}_3$ ):  $\delta$  5.24-5.15 (m, 2H, H-4 and H-2), 5.04-4.97 (m, 1H, H-1), 3.87 (dd,  $J = 8.8, 2.7$  Hz, 1H, H-3), 2.06 (s, 3H), 2.05 (s, 3H) 1.98 (s, 3H), 2.10-1.58 (series of m, 8H,  $\text{CH}_2$ ).  $^{13}\text{C-NMR}$  (100 MHz,  $\text{CDCl}_3$ ):  $\delta$  170.1, 170.0, 169.8, 72.7, 72.1, 71.3, 65.6, 31.2, 28.6, 23.5, 21.8, 21.1, 21.0, 20.8; IR (KBr,  $\text{cm}^{-1}$ ): 2941, 2870, 2106, 1744, 1433, 1371, 1238, 1028, 974, 906. Anal. Calcd for  $\text{C}_{14}\text{H}_{21}\text{N}_3\text{O}_6$  (327.14): C 51.37; H 6.47; N 12.84; found C 51.52; H 6.52; N 12.99.

**(1S(R),2S(R),3R(S),4R(S))-3-Aminocyclooctane-1,2,4-triol (12).** **General procedure for hydrogenation:** In a similar manner as described in the literature [2], into a 50 mL flask was placed palladium on charcoal (30 mg, 10%) and azidotriol **10** (250 mg, 1.24 mmol) in absolute methanol (30 mL). The reaction mixture was flushed with hydrogen gas (the air in the solvent was removed under vacuum, and then the flask was filled with hydrogen gas; this process was repeated three times). The resulting mixture was stirred at room temperature for 2 h under the hydrogen atmosphere. The catalyst was removed by filtration. Evaporation of the solvent gave pure aminotriol **12** (207 mg, 95%) as a colourless viscous oil.  $^1\text{H-NMR}$  (400 MHz,  $\text{CD}_3\text{OD}$ ):  $\delta$  3.99-3.91 (m, 1H, H-4), 3.75 (t,  $J = 8.4$ , 1H, H-2), 3.54-3.47 (m, H-1), 3.08 (dd,  $J = 7.9, 2.8$  Hz, H-3), 1.96-1.34 (series of m, 8H,  $\text{CH}_2$ ).  $^{13}\text{C-NMR}$  (100 MHz,  $\text{CD}_3\text{OD}$ ):  $\delta$  74.8, 69.8, 69.5, 55.1, 30.2, 30.1, 21.7, 20.8; IR (KBr,  $\text{cm}^{-1}$ ): 3390, 2935, 1466, 1386, 1123, 1037. Anal. Calcd for  $\text{C}_8\text{H}_{17}\text{NO}_3$  (175.12): C 54.84; H 9.78; N 7.99; found C 54.74; H 9.71; N 7.88.

**(1R(S),2S(R),7R(S),8S(R))-9-Oxabicyclo[6.1.0]nonane-2,7-diol (13):** Compound **13** was prepared as described in the literature [1].

**(1S(R),2R(S),3R(S),4R(S))-3-Bromocyclooctane-1,2,4-triol (14):** Absolute methanol (25 mL) containing 35% HBr gas was added into *trans*-epoxide **13** (1.30 g, 8.22 mmol) and stirred at  $0^\circ\text{C}$  for 30 min. Then, the reaction mixture was stirred for 19 h at room temperature. After removal of the solvent, crude product was dissolved in 25 mL of methanol and added into excess  $\text{BaCO}_3$  (10 g) for neutralization ( $\text{pH} = 8$ ), and stirred magnetically at room temperature for 4 h. The solvent was removed under reduced pressure and the residue

was dissolved in acetone and stirred for 5 min. The solid was filtered off. Evaporation of the solvent gave bromotriol **14** (1.89 g, 96%) as a colourless oil.  $^1\text{H-NMR}$  (400 MHz,  $\text{CD}_3\text{OD}$ ):  $\delta$  4.25 (dd,  $J = 8.7, 2.2$  Hz, 1H, H-3), 4.05-3.97 (m, H-4), 3.93 (t,  $J = 8.6$  Hz, 1H, H-2), 3.76-3.64 (m, H-1), 2.00-1.40 (series of m, 8H,  $\text{CH}_2$ ).  $^{13}\text{C-NMR}$  (100 MHz,  $\text{CD}_3\text{OD}$ ):  $\delta$  76.6, 71.5, 69.1, 68.1, 35.1, 33.2, 23.3, 21.8; IR (KBr,  $\text{cm}^{-1}$ ): 3418, 2986, 2930, 2866, 1456, 1371, 1216, 1171, 1055, 1019, 949. Anal. Calcd for  $\text{C}_8\text{H}_{15}\text{BrO}_3$  (238.02): C 40.19; H 6.32; found C 40.09; H 6.40.

**(1S(R),2R(S),3R(S),4R(S))-3-Bromocyclooctane-1,2,4-triyl triacetate (15):** The bromotriol **14** (3.0 g, 12.55 mmol) was submitted to acetylation with  $\text{Ac}_2\text{O}$  and DMAP in pyridine following the method described above for the acetylation of **10** to give **15**: 3.75 g, 81%. Bromotriacetate **15** was recrystallized from  $\text{CH}_2\text{Cl}_2$ /hexane as colourless crystals; mp 92-94  $^\circ\text{C}$ .  $^1\text{H-NMR}$  (400 MHz,  $\text{CDCl}_3$ ):  $\delta$  5.46 (t,  $J = 9.0$  Hz, 1H, H-2), 5.21-5.15 (m, 1H, H-4), 5.07 (ddd,  $J = 8.5, 7.3, 3.9$  Hz, 1H, H-1), 4.42 (dd,  $J = 9.3, 2.4$  Hz, 1H, H-3), 2.08 (s, 3H), 2.07 (s, 3H), 2.00 (s, 3H), 1.99-1.58 (series of m, 8H,  $\text{CH}_2$ ).  $^{13}\text{C-NMR}$  (100 MHz,  $\text{CDCl}_3$ ):  $\delta$  170.2, 169.8, 169.7, 74.3, 71.8, 71.0, 57.3, 31.8, 30.5, 23.3, 21.9, 21.3, 21.0, 20.8; IR (KBr,  $\text{cm}^{-1}$ ): 2938, 2882, 1743, 1469, 1447, 1380, 1233, 1090, 1033, 975. Anal. Calcd for  $\text{C}_{14}\text{H}_{21}\text{BrO}_6$  (364.05): C 46.04; H 5.80; found C 46.06; H 5.66.

**(1S(R),2S(R),3S(R),4R(S))-3-Azidocyclooctane-1,2,4-triol (16):** To a magnetically stirred solution of **15** (1.26 g, 5.27 mmol) in DMF (15 mL) to the mixture was added  $\text{NaN}_3$  (2.74 g, 42.16 mmol) and the mixture heated to 100  $^\circ\text{C}$  and was stirred at 100  $^\circ\text{C}$  for 28 h. The reaction mixture was filtered with methanol through a pad of silica gel in a sintered glass funnel. After evaporation of the solvents, chromatography of the mixture on a silica gel (100 g) column eluting with  $\text{MeOH}/\text{CH}_2\text{Cl}_2$  (4:96) gave the azidotriol **16** (0.83 g, 78%) as a colourless oil.  $^1\text{H-NMR}$  (400 MHz,  $\text{D}_2\text{O}$ ):  $\delta$  3.90 (dd,  $J = 8.7, 2.5$  Hz, H-2), 3.88-3.76 (m, 2H, H-1 and H-4), 3.69 (dd,  $J = 9.2, 2.5$  Hz, 1H, H-3), 1.96-1.48 (series of m, 8H,  $\text{CH}_2$ ).  $^{13}\text{C-NMR}$  (100 MHz,  $\text{D}_2\text{O}$ ):  $\delta$  74.9, 72.4, 71.7, 70.0, 32.5, 31.4, 23.8, 23.2; IR (KBr,  $\text{cm}^{-1}$ ): 3399, 2932, 2872, 2114, 1453, 1416, 1359, 1260, 1161, 1092, 1053, 1001, 982. Anal. Calcd for  $\text{C}_8\text{H}_{15}\text{N}_3\text{O}_3$  (201.11): C 47.75; H 7.51; N 20.88; found C 47.60; H, 7.41; N 20.79.

**(1S(R),2S(R),3S(R),4R(S))-3-Azidocyclooctane-1,2,4-triyl triacetate (17):** The azidotriol **16** (200 mg, 0.99 mmol) was submitted to acetylation with  $\text{Ac}_2\text{O}$  and DMAP in pyridine following the method described above for the acetylation of **10** to give **17**: 243 mg, 74%; as a

colourless oil.  $^1\text{H-NMR}$  (400 MHz,  $\text{CDCl}_3$ ):  $\delta$  5.47 (dd,  $J_{2,1} = 9.4$  Hz,  $J_{2,3} = 2.2$  Hz, 1H, H-2), 5.28-5.21 (m, 1H, H-1), 4.96 (t,  $J = 7.8$  Hz, 1H, H-4), 3.95 (dd,  $J = 8.6$  Hz,  $J_{3,2} = 2.2$  Hz, H-3), 2.10 (s, 6H, 2xOAc) 2.02 (s, 3H, OAc) 2.10-1.55 (series of m, 8H,  $\text{CH}_2$ ).  $^{13}\text{C-NMR}$  (100 MHz,  $\text{CDCl}_3$ ):  $\delta$  170.0, 169.9, 169.7, 75.3, 72.6, 71.9, 65.4, 30.3, 28.4, 24.6, 21.7, 21.1, 21.0, 20.7; IR (KBr,  $\text{cm}^{-1}$ ): 2943, 2887, 2118, 1742, 1472, 1445, 1371, 1253, 1201, 1094, 1033 960. Anal. Calcd for  $\text{C}_{14}\text{H}_{21}\text{N}_3\text{O}_6$  (327.14): C 51.37; H, 6.47; N, 12.84; found C 51.43; H, 6.33; N, 12.73.

**(1S(R),2S(R),3S(R),4R(S))-3-Aminocyclooctane-1,2,4-triol (18):** The azidotriol **16** (200 mg, 0.99 mmol) was hydrogenated with Pd (10% on activated carbon; 25 mg) as described above for the synthesis of **12** to give aminotriol **18** (170 mg, 97%); as a colourless oil.  $^1\text{H-NMR}$  (400 MHz,  $\text{D}_2\text{O}$ ):  $\delta$  3.74 (ddd,  $J = 8.2, 6.6, 1.4$  Hz, 1H, H-1), 3.61 (dd,  $J = 8.8, J_{2,3} = 2.7$  Hz, 1H, H-2), 3.60-3.54 (m, 1H, H-4) 2.90 (dd,  $J_{3,4} = 9.4, J_{3,2} = 2.7$  Hz, 1H, H-3), 1.90-1.32 (series of m, 8H,  $\text{CH}_2$ ).  $^{13}\text{C-NMR}$  (100 MHz,  $\text{D}_2\text{O}$ ):  $\delta$  76.5, 73.4, 72.8, 56.7, 32.9, 32.2, 24.7, 23.3; IR (KBr,  $\text{cm}^{-1}$ ): 3390, 2935, 1466, 1386, 1123, 1037. Anal. Calcd for  $\text{C}_8\text{H}_{17}\text{NO}_3$  (175.12): C 54.84; H 9.78; N 7.99; found C 54.74; H 9.66; N 7.89.

**(1S(R),2R(S),3R(S),4R(S))-3-Chlorocyclooctane-1,2,4-triol (19):** To a magnetically stirred solution of the *trans*-epoxide **13** (2.0 g, 12.64 mmol) in absolute methanol (5 mL) was cooled to 0 °C. Then, absolute methanol (30 mL) containing 20% HCl gas was added into the reaction mixture and stirred at room temperature for 19 h. Evaporation of the solvent under reduced pressure and crystallization of the residue from MeOH/ether (8:2) gave chlorotriol **19** as colourless crystals (2.37 g, 96%), mp 117-119 °C.  $^1\text{H-NMR}$  (400 MHz,  $\text{D}_2\text{O}$ ):  $\delta$  4.14 (dt,  $J = 9.0, J_{3,4} = 2.8$  Hz, H-4), 4.07 (dd,  $J = 8.6, J_{3,4} = 2.8$  Hz, H-3), 3.74 (t,  $J = 8.8$  Hz, H-2), 3.60 (ddd,  $J = 9.3, 5.7, 4.0$  Hz, H-1), 1.90-1.34 (series of m, 8H,  $\text{CH}_2$ ).  $^{13}\text{C-NMR}$  (100 MHz,  $\text{D}_2\text{O}$ ):  $\delta$  74.8, 71.8, 71.4, 69.4, 33.0, 31.2, 23.6, 20.9; IR (KBr,  $\text{cm}^{-1}$ ): 3292, 2934, 2875, 1459, 1402, 1322, 1295, 1256, 1234, 1215, 1144, 1040, 975. Anal. Calcd for  $\text{C}_8\text{H}_{15}\text{ClO}_3$  (194.07): C 49.36; H 7.77; found C 49.42; H 7.75.

**(1S(R),2R(S),3R(S),4R(S))-3-Chlorocyclooctane-1,2,4-triyl triacetate (20):** The chlorotriol **19** (2.5 g, 12.84 mmol) was submitted to acetylation with  $\text{Ac}_2\text{O}$  and DMAP in pyridine following the method described above for the acetylation of **10** to give **20**: 3.76 g, 91%. Chlorotriacetate **20** was recrystallized from  $\text{CH}_2\text{Cl}_2$ /hexane (9:1) as colourless crystals, mp 75-76 °C.  $^1\text{H-NMR}$  (400 MHz,  $\text{CDCl}_3$ ):  $\delta$  5.39 (t,  $J = 8.8$  Hz, H-2), 5.35 (dt,  $J = 9.7, J_{3,4} = 2.5$



Hz, H-4), 5.12-5.06 (m, H-1), 4.35 (dd,  $J = 9.0$ ,  $J_{3,4} = 2.5$  Hz, H-3), 2.11 (s, 3H), 2.10 (s, 3H), 2.03 (s, 3H), 2.20-1.57 (series of m, 8H, CH<sub>2</sub>). <sup>13</sup>C-NMR (100 MHz, CDCl<sub>3</sub>):  $\delta$  170.3, 169.8, 169.8, 74.3, 71.4, 71.3, 64.1, 31.7, 29.1, 23.3, 21.9, 21.2, 21.0, 20.8; IR (KBr, cm<sup>-1</sup>): 3292, 2934, 2875, 1459, 1402, 1322, 1295, 1256, 1215, 1144, 1097, 1040, 975, 948. Anal. Calcd for C<sub>14</sub>H<sub>21</sub>ClO<sub>6</sub> (320.10): C 52.42; H 6.60; found C 52.47; H 6.49.

**Acetylation and reaction of epoxy-diol **22** with HCl(g)-MeOH:** To a magnetically stirred solution of epoxydiol **22** (500 mg, 3.16 mmol) in absolute methanol (5 mL) was cooled to 0 °C. Then, Absolute methanol (15 mL) containing 40% HCl gas was added into the reaction mixture and stirred at room temperature for 2.5 h. Evaporation of the solvent gave a mixture of chlorotriol **23** and chlorotriol **24** (590 mg, total yield 96%). From <sup>1</sup>H NMR spectroscopy, it was observed that the mixture of **23** and **24** was in an 85:15 ratio. But these isomers could not be obtained in pure form, although all chromatographic purification methods were employed. Then, 450 mg (2.31 mmol) of the resultant mixture was submitted to acetylation with Ac<sub>2</sub>O and DMAP in pyridine following the method described above for the acetylation of **10** to give a mixture of the diacetate isomer (670 mg), total yield 90%. Chromatography of the mixture on a silica gel column (80 g) eluting with EtOAc/hexane (10:90) gave the first fraction of chlorotriacetate **26** (90 mg, 12%, as a colourless oil) and the second chlorotriacetate **25** (0.55 g, 74%, as a colourless oil).

**(1S(R),2S(R),3R(S),4R(S))-4-Chlorocyclooctane-1,2,3-triyl triacetate (**25**):** <sup>1</sup>H-NMR (400 MHz, CDCl<sub>3</sub>):  $\delta$  5.62 (dd,  $J = 9.7$ , 8.1 Hz, H-3), 5.25 (dt,  $J = 7.3$ ,  $J_{1,2} = 2.3$  Hz, H-1), 5.05 (dd,  $J = 8.0$ ,  $J_{1,2} = 2.3$  Hz, H-2) 4.26 (ddd,  $J = 13.1$ , 8.7, 3.3 Hz, H-4), 2.09 (s, 3H), 2.07 (s, 3H), 2.03 (s, 3H), 2.25-1.50 (series of m, 8H, CH<sub>2</sub>). <sup>13</sup>C-NMR (100 MHz, CDCl<sub>3</sub>):  $\delta$  170.2, 169.7, 169.0, 71.9, 71.4, 70.6, 62.3, 30.0, 27.5, 21.5, 20.9, 20.5, 20.5, 19.8; IR (KBr, cm<sup>-1</sup>): 2942, 2863, 1747, 1434, 1372, 1251, 1053, 966. Anal. Calcd for C<sub>14</sub>H<sub>21</sub>ClO<sub>6</sub> (320.10): C 52.42; H 6.60; found C 52.53; H 6.70.

**(1S(R),2S(R),3R(S),4S(R))-3-Chlorocyclooctane-1,2,4-triyl triacetate (**26**):** <sup>1</sup>H-NMR (400 MHz, CDCl<sub>3</sub>):  $\delta$  5.71 (t,  $J = 2.3$  Hz, H-2), 5.25-5.18 (m, H-4) 5.15-5.09 (m, H-1) 4.34 (dd,  $J = 9.5$ , 1.9 Hz, H-3), 2.18 (s, 3H), 2.10 (s, 3H), 2.05 (s, 3H), 2.00-1.34 (series of m, 8H, CH<sub>2</sub>). <sup>13</sup>C-NMR (100 MHz, CDCl<sub>3</sub>):  $\delta$  170.2, 169.9, 169.7, 75.5, 74.0, 73.6, 62.5, 29.7, 27.1, 22.7, 22.2, 21.0, 21.0, 20.7; IR (KBr, cm<sup>-1</sup>): 2937, 1740, 1645, 1435, 1370, 1239, 1092, 1035, 963. Anal. Calcd for C<sub>14</sub>H<sub>21</sub>ClO<sub>6</sub> (320.10): C 52.42; H 6.60; found C 52.30; H 6.64.

**(1*R*(S),2*R*(S),3*S*(*R*),4*S*(*R*))-4-Chlorocyclooctane-1,2,3-triol (23):** To a magnetically stirred solution of chlorotriacetate **25** (200 mg, 0.62 mmol) in absolute methanol (3 mL) was cooled to 0 °C. Then, Absolute methanol (15 mL) containing 20% HCl gas was added into the reaction mixture and stirred at room temperature for 2.5 h. Evaporation of the solvent gave chlorotriol **23** (118 mg, yield 97%). The chlorotriol **23** was recrystallized from CH<sub>2</sub>Cl<sub>2</sub>/hexane (9:1) as colourless crystals, mp 107-108 °C. <sup>1</sup>H-NMR (400 MHz, CDCl<sub>3</sub>): δ 4.03-3.96 (m, H-1), 3.89 (dt, *J* = 7.8, 2.6 Hz, H-4), 3.85 (dd, *J* = 9.6, *J*<sub>3,2</sub> = 7.9 Hz, H-3) 3.54 (dd, *J*<sub>2,3</sub> = 7.9, 2.7 Hz, H-2), 2.00-1.20 (series of m, 8H, CH<sub>2</sub>). <sup>13</sup>C-NMR (100 MHz, CDCl<sub>3</sub>): δ 72.5, 72.0, 71.2, 67.9, 30.5, 28.9, 21.5, 20.3; IR (KBr, cm<sup>-1</sup>): 3400, 2925, 2878, 2863, 2731, 1467, 1458, 1392, 1372, 1284, 1267, 1221, 1067, 980, 959. Anal. Calcd for C<sub>8</sub>H<sub>15</sub>ClO<sub>3</sub> (194.07): C 49.36; H 7.77; found C 49.43; H 7.66.

**(1*R*(S),2*R*(S),3*S*(*R*),4*R*(S))-3-Chlorocyclooctane-1,2,4-triol (24):** The chlorotriacetate **26** (300 mg, 0.93 mmol) was submitted to hydrolysis with HCl(g)-MeOH following the method described above for the hydrolysis of **25** to give **24**: 173 mg, 95%, as a colourless oil. <sup>1</sup>H-NMR (400 MHz, CDCl<sub>3</sub>): δ 4.17 (dd, *J* = 3.0, 1.6 Hz, H-2), 4.04 (dd, *J*<sub>3,4</sub> = 9.2, *J* = 1.4 Hz, H-3), 3.92-3.86 (m, H-4), 3.64 (dt, *J* = 11.9, 3.6 Hz, 1H), 2.00-0.95 (series of m, 8H, CH<sub>2</sub>). <sup>13</sup>C-NMR (100 MHz, CDCl<sub>3</sub>): δ 75.7, 74.5, 74.4, 69.7, 30.9, 28.4, 22.8, 21.9; IR (KBr, cm<sup>-1</sup>): 3410, 2983, 2934, 1466, 1370, 1254, 1218, 1163, 1121, 1051, 961. Anal. Calcd for C<sub>8</sub>H<sub>15</sub>ClO<sub>3</sub> (194.07): C 49.36; H 7.77; found C 49.26; H 7.69.

## References

- 1 Salamci, E. *Tetrahedron* **2010**, *66*, 4010-4015.
- 2 Karavaizoglu, U. N.; Salamci, E. *New J. Chem.* **2020**, *44*, 17976-17983.

## B. NMR Spectra

(2*s*,3*aR*(*S*),4*S*(*R*),9*R*(*S*),9*aS*(*R*))-2-Oxidooctahydrocycloocta[*d*][1,3,2]dioxathiole-4,9-diyl diacetate (**8**): CDCl<sub>3</sub> (<sup>1</sup>H NMR and <sup>13</sup>C NMR)

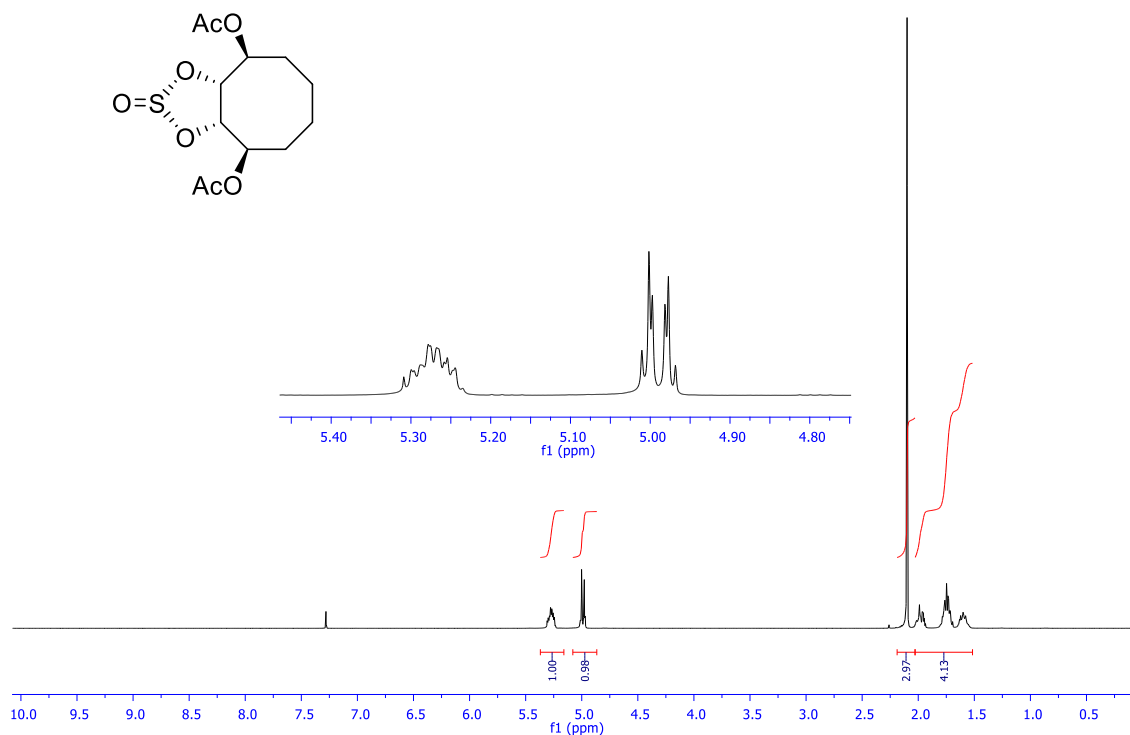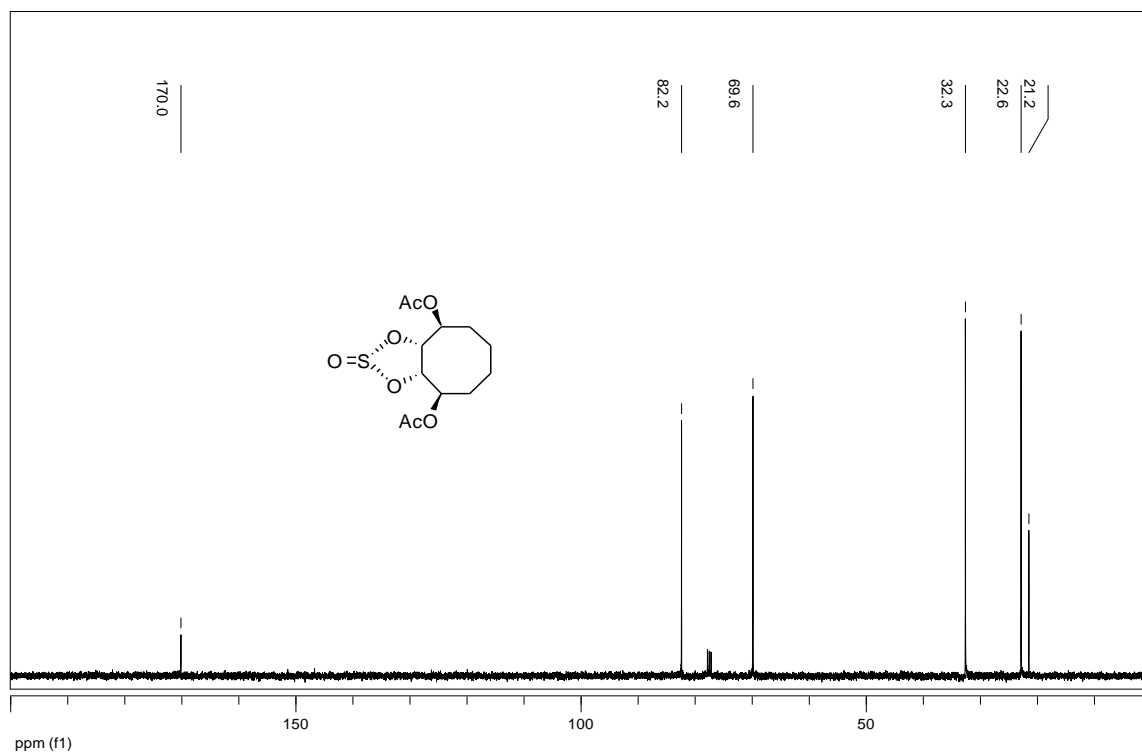

(2*s*,3*aR*(*S*),4*S*(*R*),9*R*(*S*),9*aS*(*R*))-2-Oxidooctahydrocycloocta[*d*][1,3,2]dioxathiole-4,9-diyl diacetate (8): CDCl<sub>3</sub>-HMQC

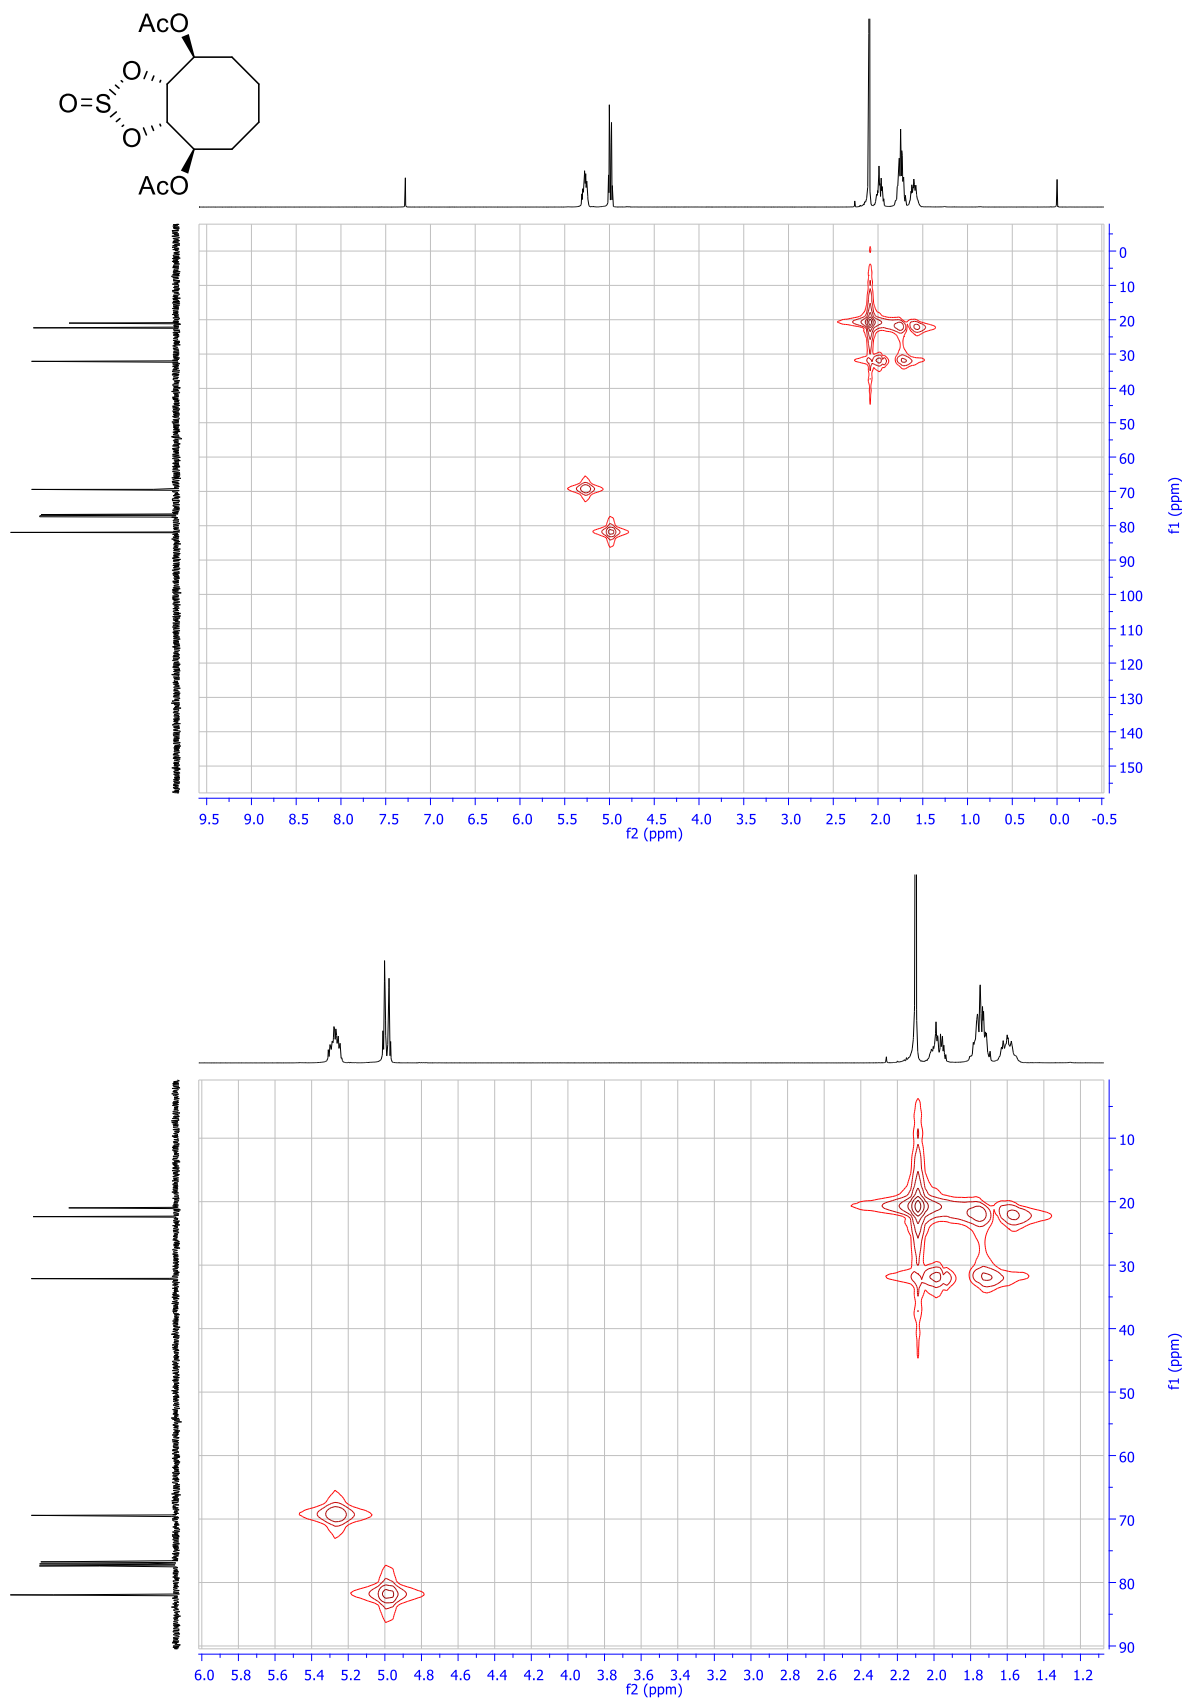

(2*s*,3*aR*(*S*),4*S*(*R*),9*R*(*S*),9*aS*(*R*))-2-Oxidooctahydrocycloocta[*d*][1,3,2]dioxathiole-4,9-diyl diacetate (8):CDCl<sub>3</sub>-COSY

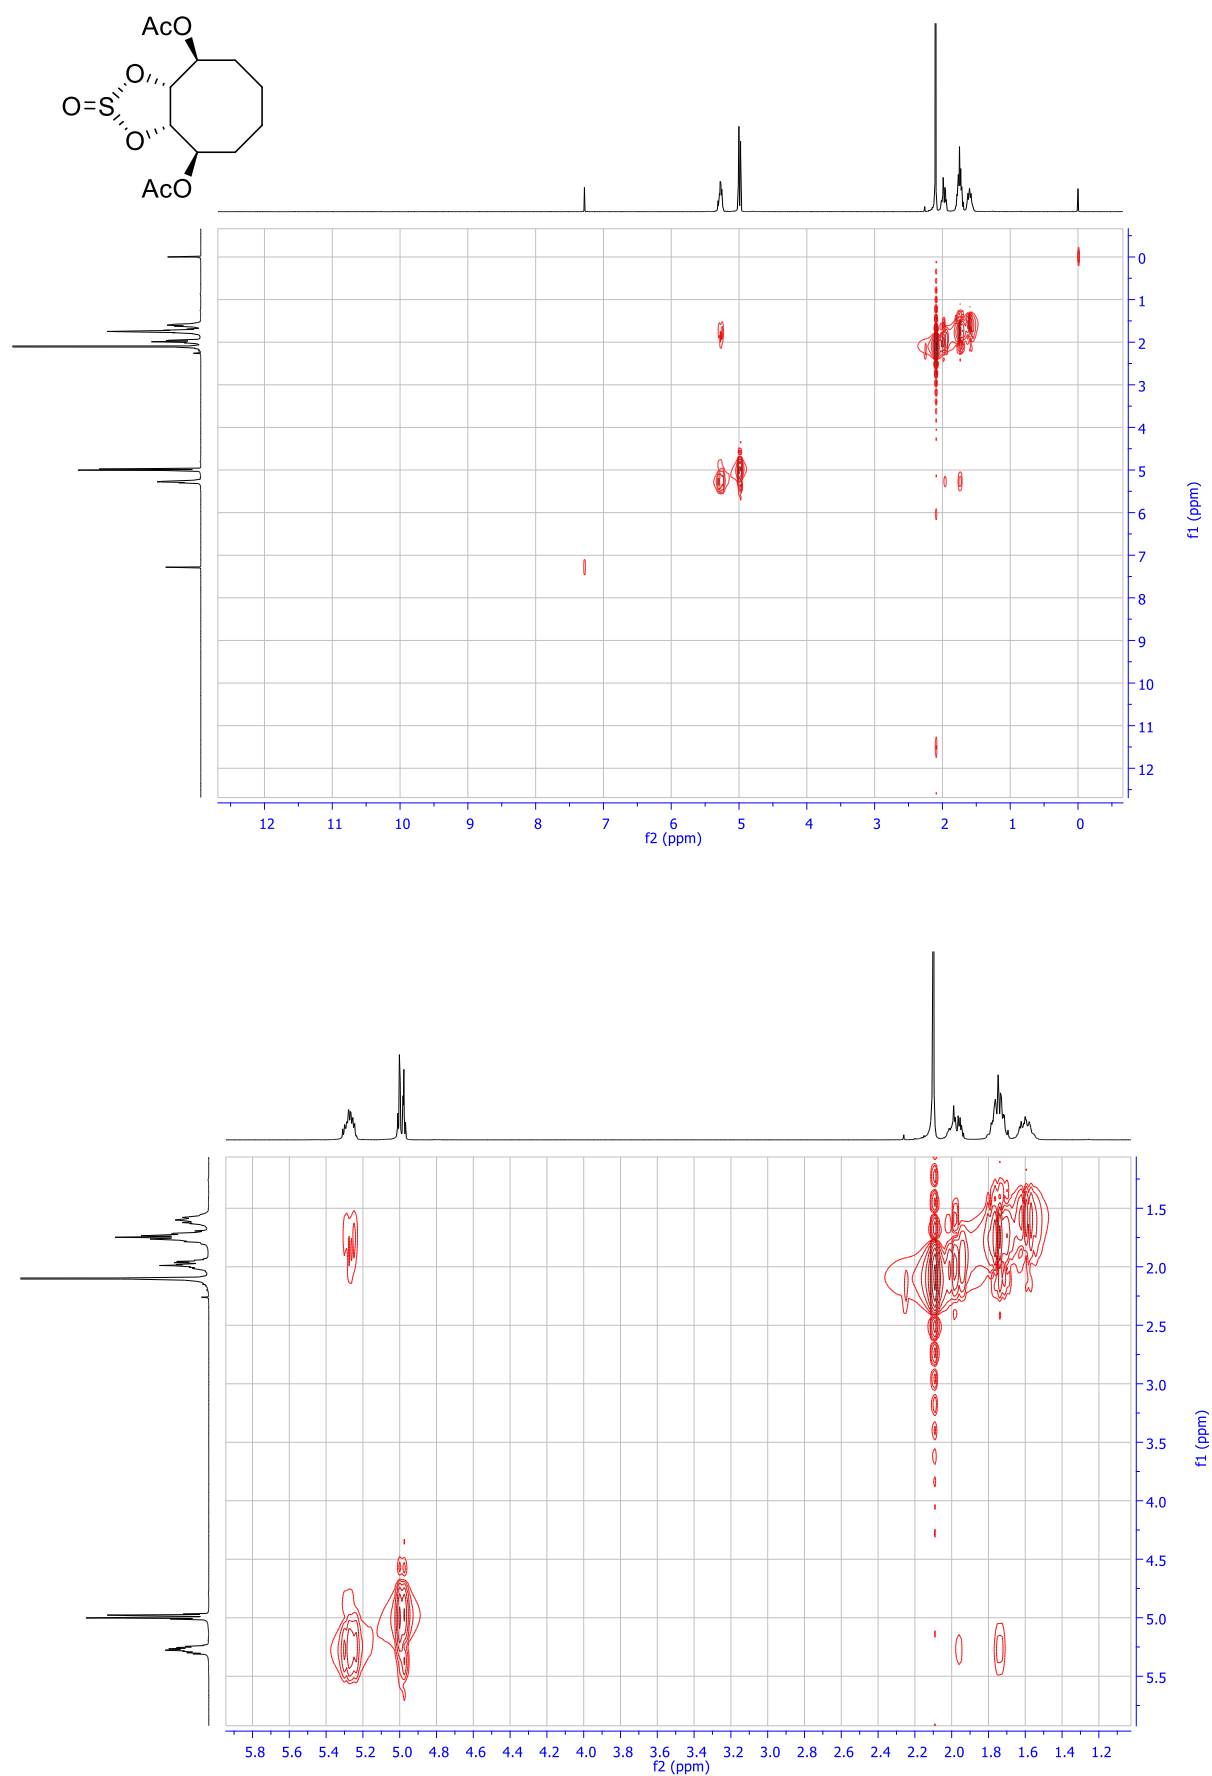

(3*aR*(*S*),4*S*(*R*),9*R*(*S*),9*aS*(*R*))-2,2-Dioxidoctahydrocycloocta[*d*][1,3,2]dioxathiole-4,9-diyl diacetate (9): CDCl<sub>3</sub> (<sup>1</sup>H NMR and <sup>13</sup>C NMR)

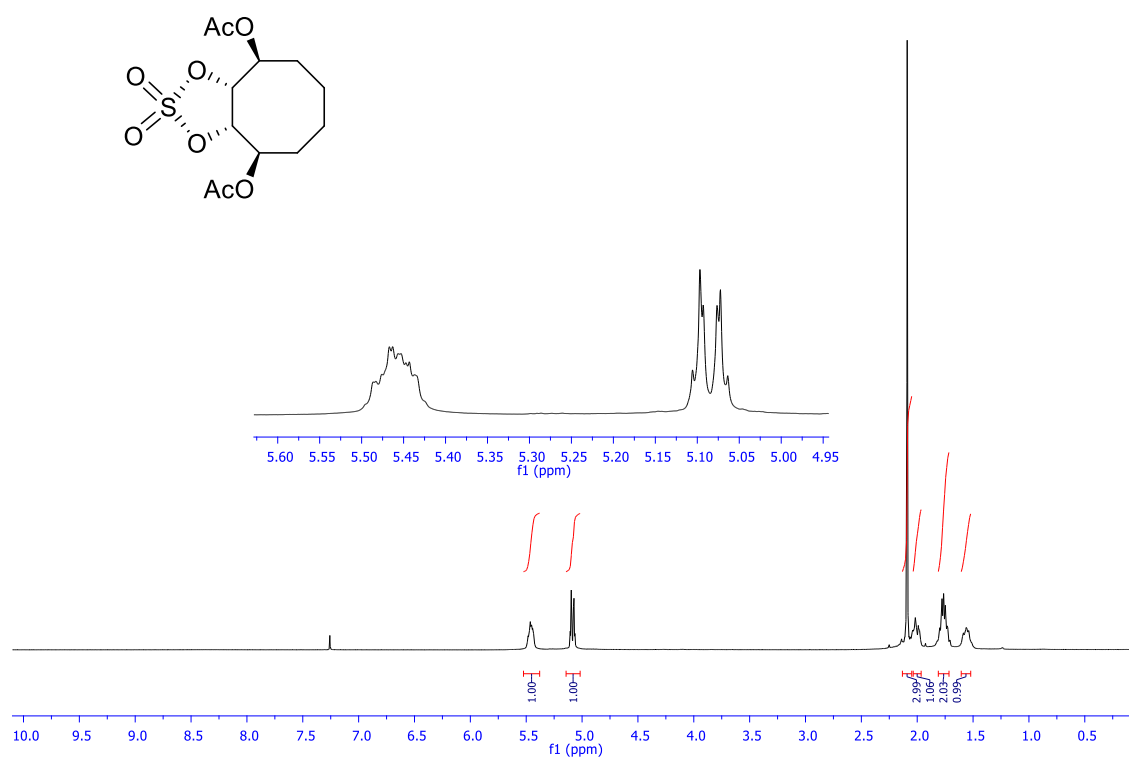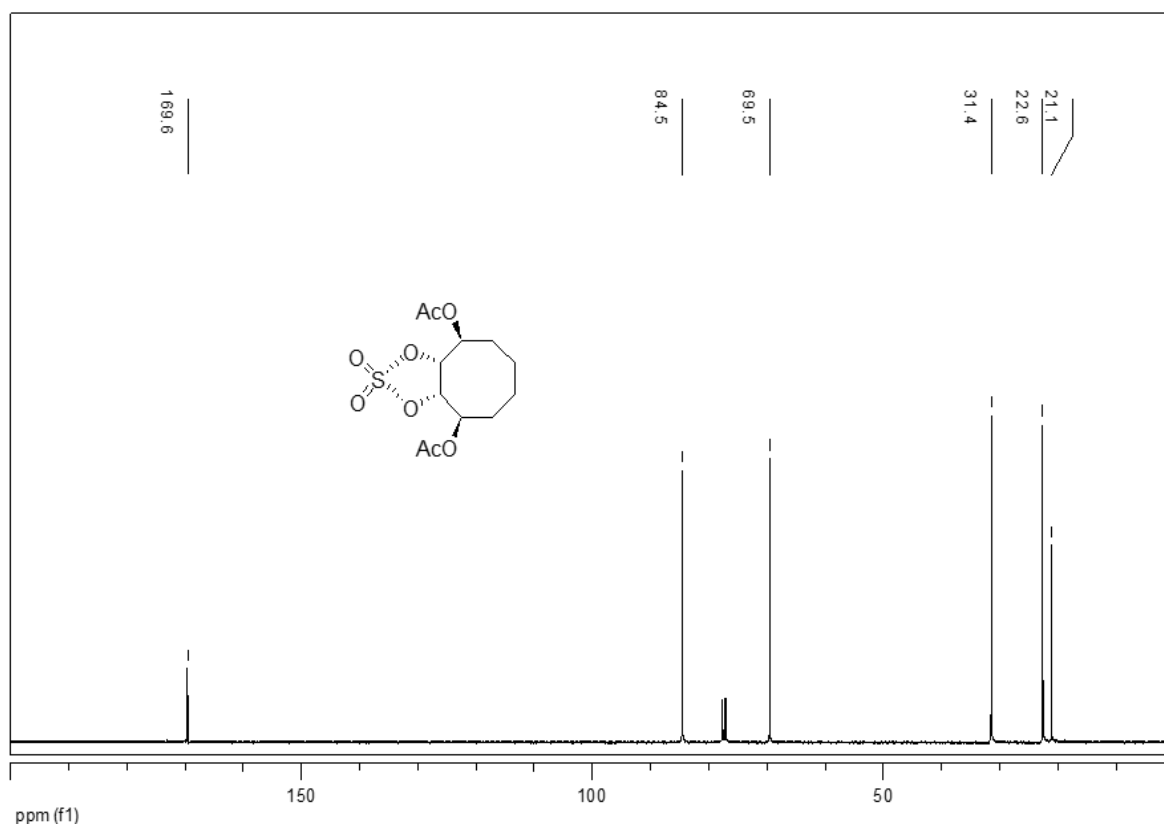

**1*S*(*R*),2*S*(*R*),3*R*(*S*),4*R*(*S*))-3-Azidocyclooctane-1,2,4-triol (10): D<sub>2</sub>O (<sup>1</sup>H NMR and <sup>13</sup>C NMR)**

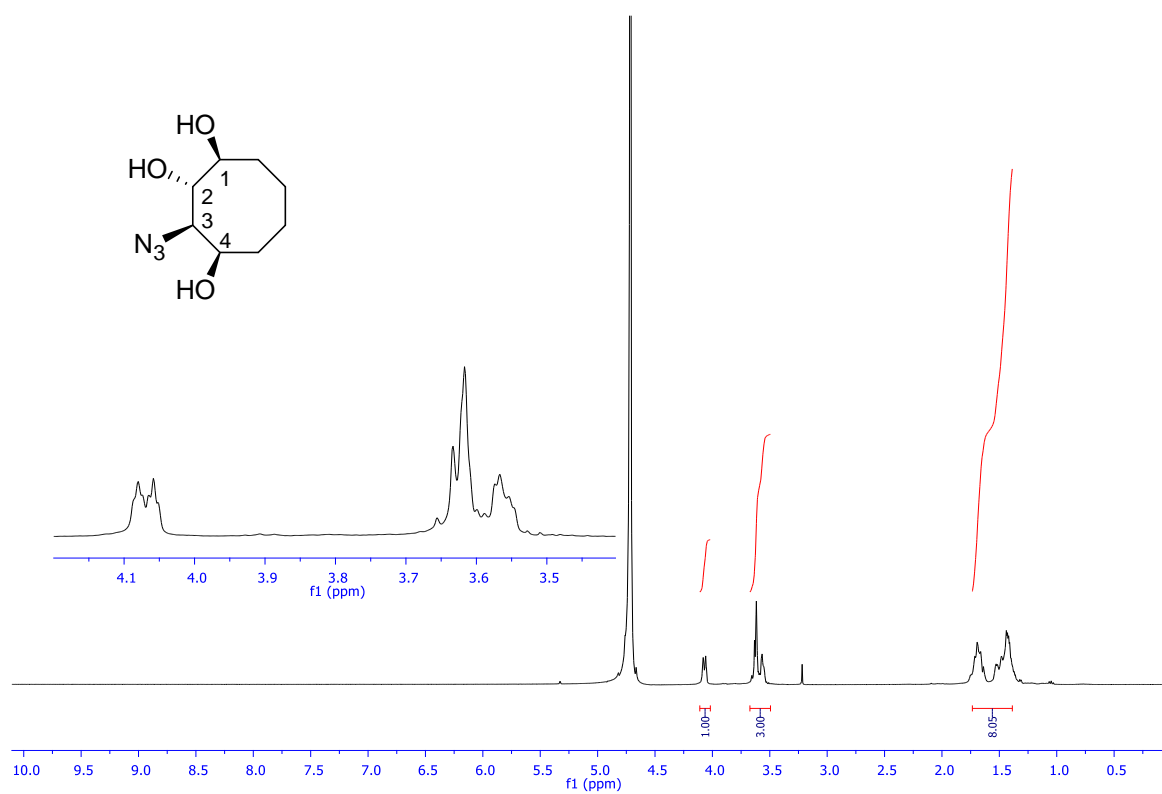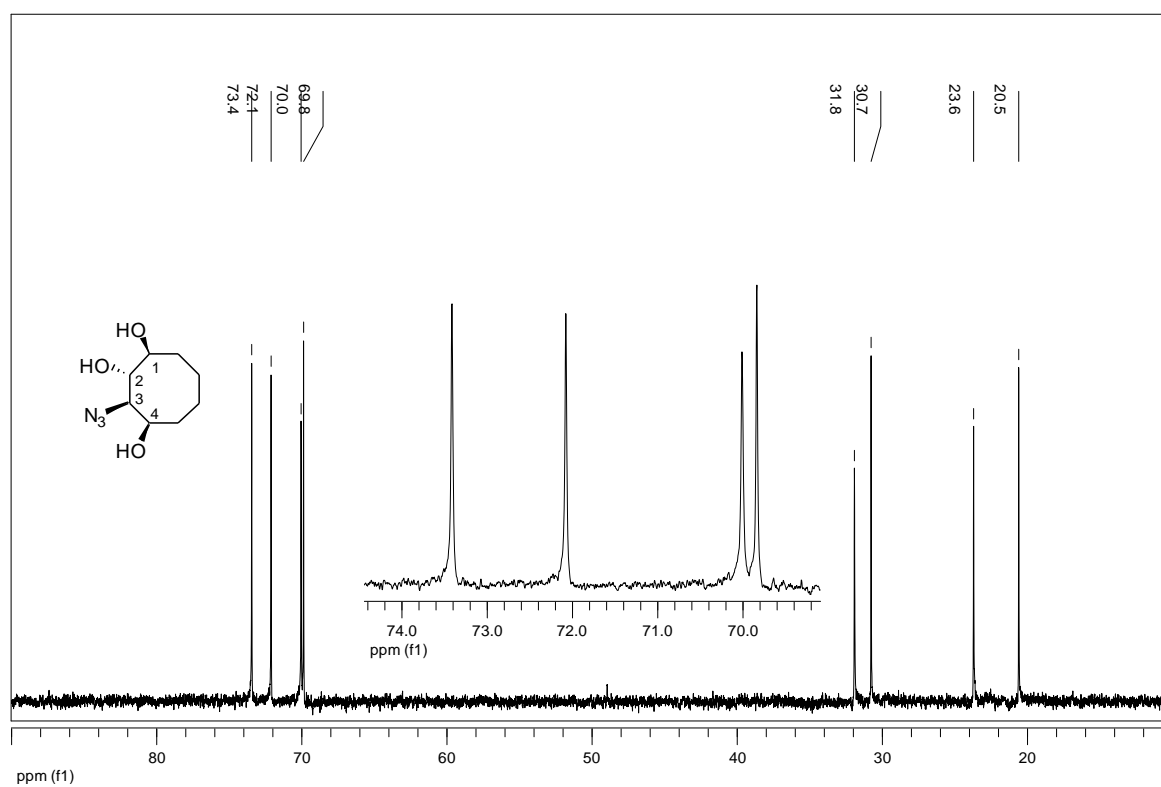

**(1*S*(*R*),2*S*(*R*),3*R*(*S*),4*R*(*S*))-3-Azidocyclooctane-1,2,4-triyl triacetate (11): CDCl<sub>3</sub> (<sup>1</sup>H NMR and Double Resonance)**

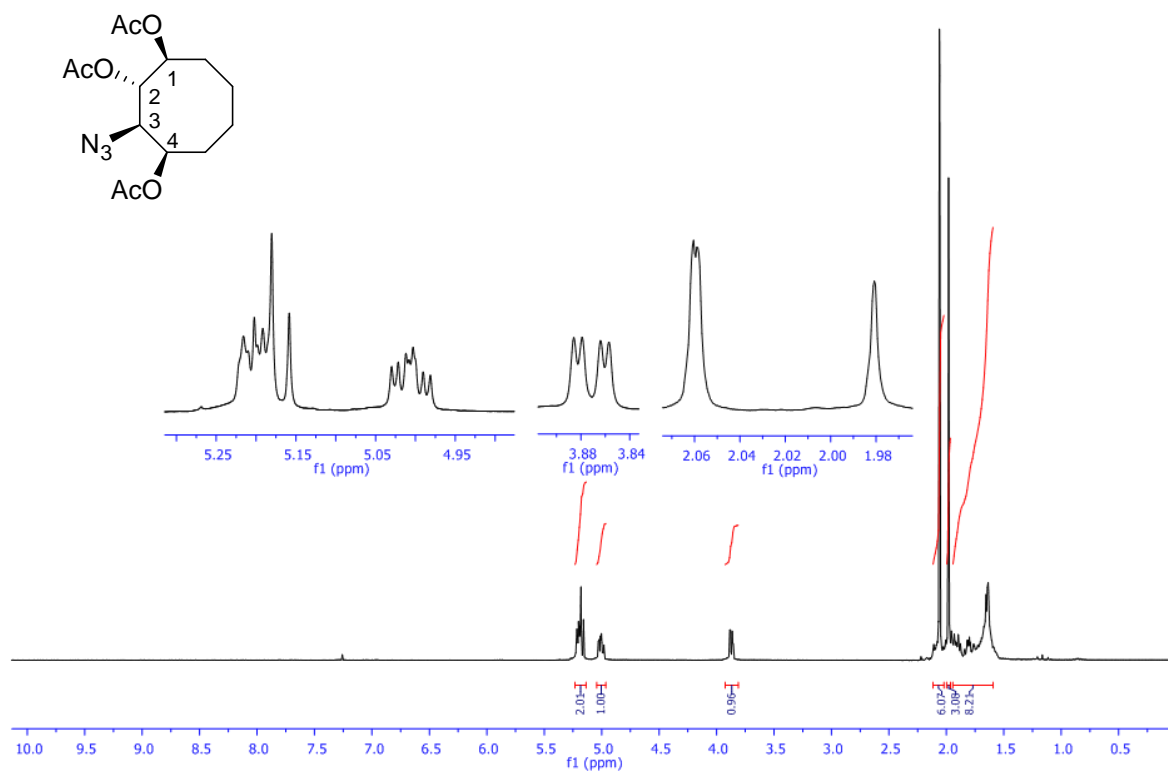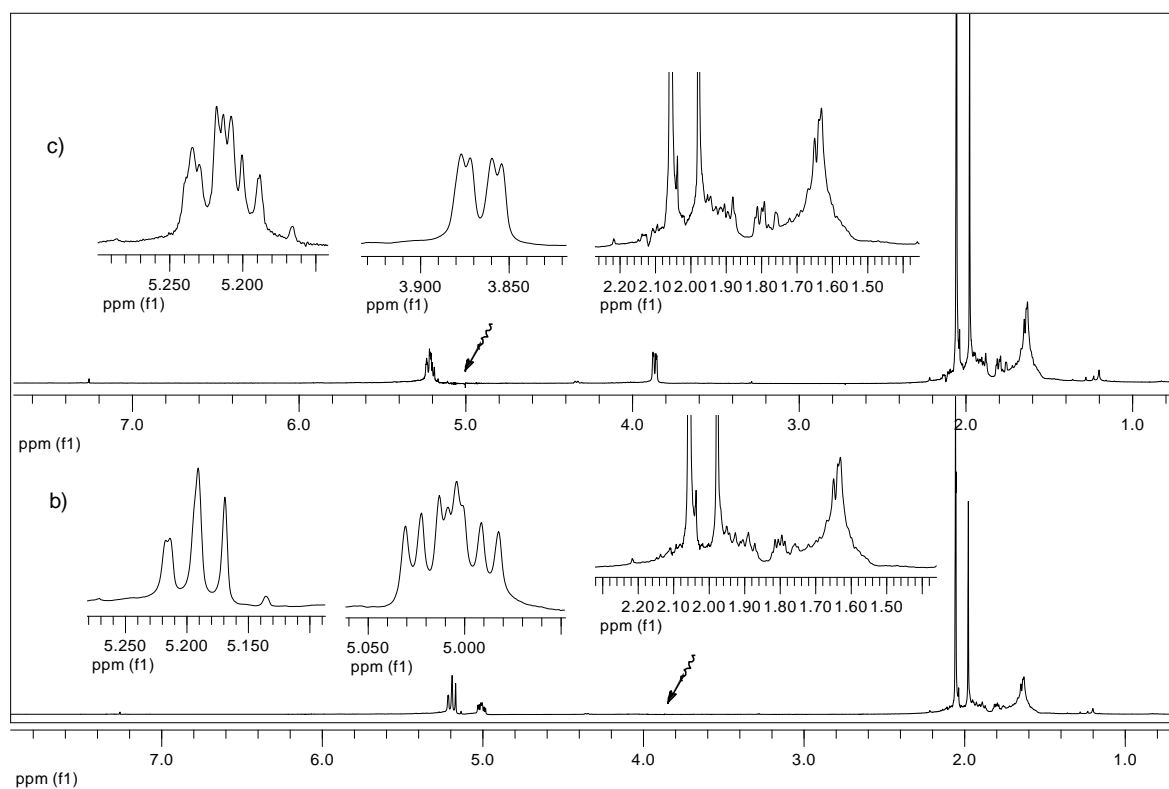



**(1*S*(*R*),2*S*(*R*),3*R*(*S*),4*R*(*S*))-3-Azidocyclooctane-1,2,4-triyl triacetate (11): CDCl<sub>3</sub> (<sup>13</sup>C NMR)**

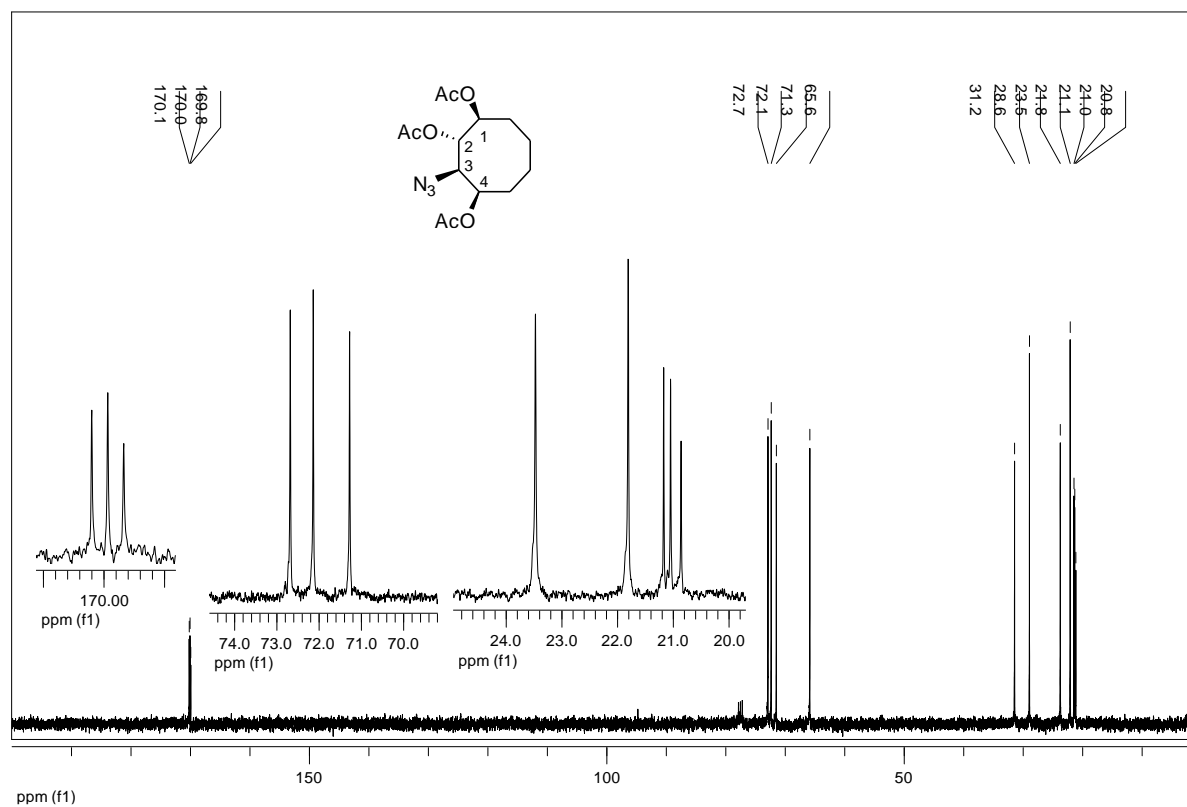

**(1*S*(*R*),2*S*(*R*),3*R*(*S*),4*R*(*S*))-3-Azidocyclooctane-1,2,4-triyl triacetate (11): NOE-Dif spectra**

**a)**

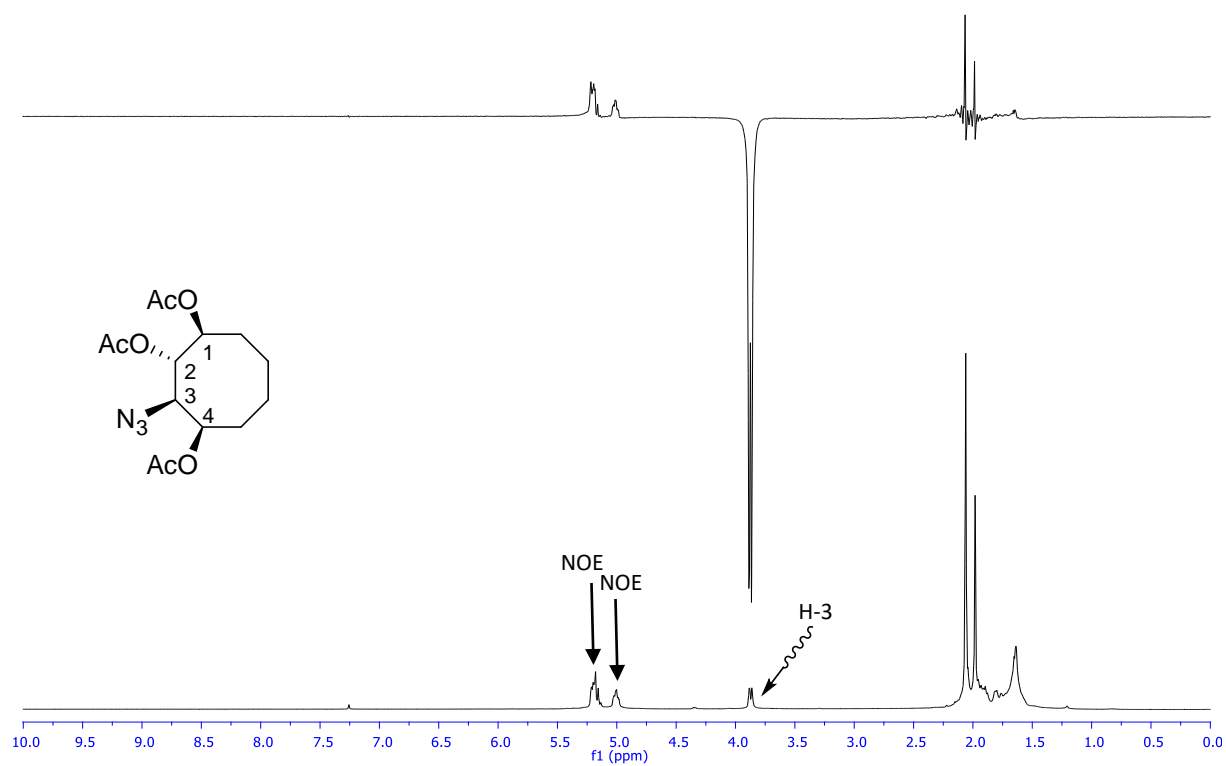

**b)**

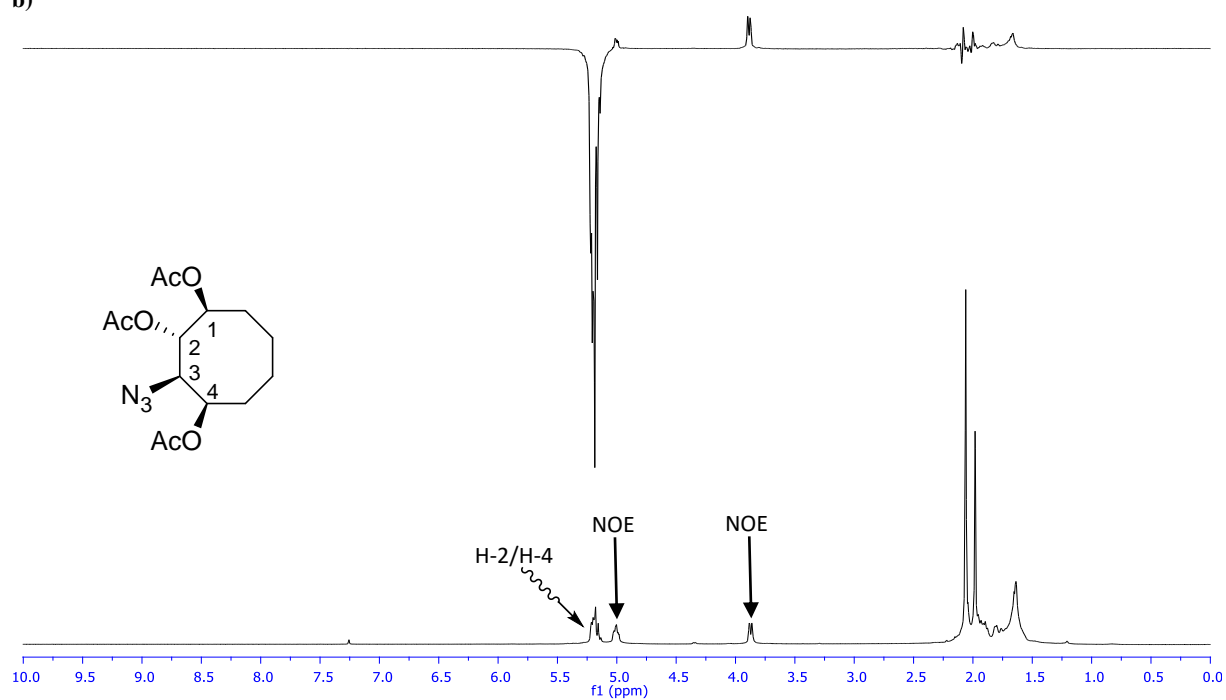

c)

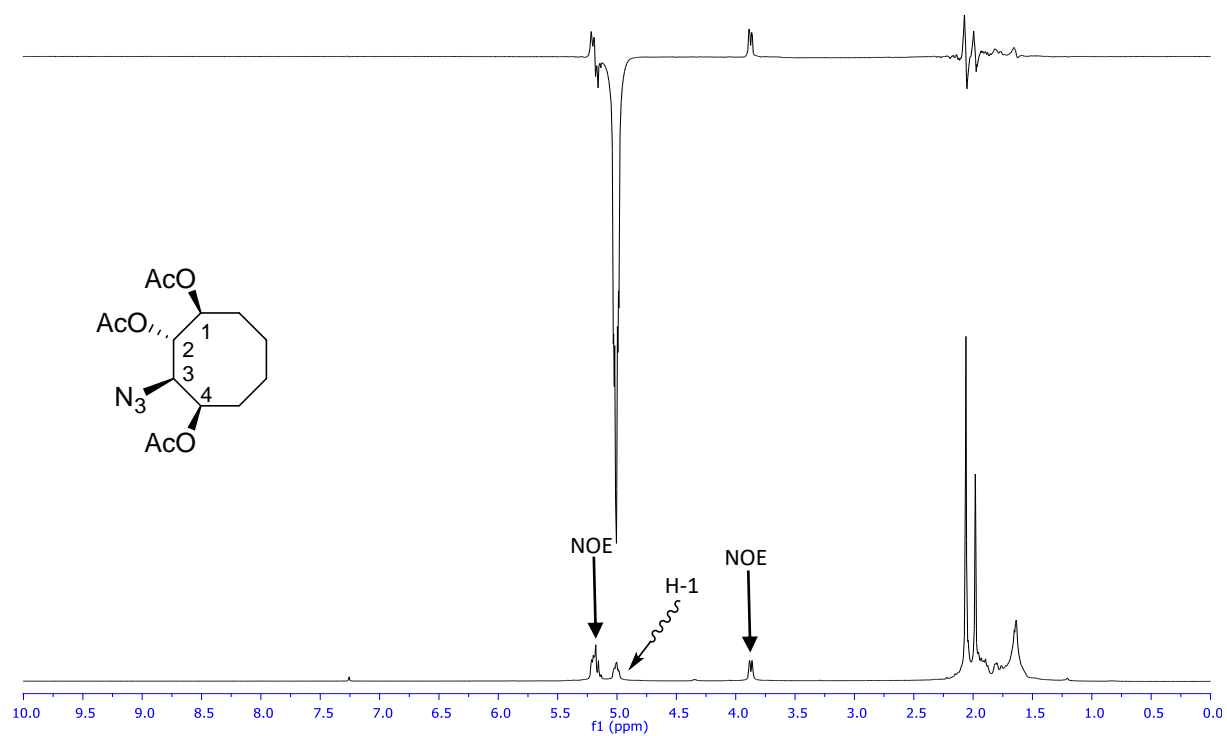

**(1*S*(*R*),2*S*(*R*),3*R*(*S*),4*R*(*S*))-3-Azidocyclooctane-1,2,4-triyl triacetate (11): HMQC**

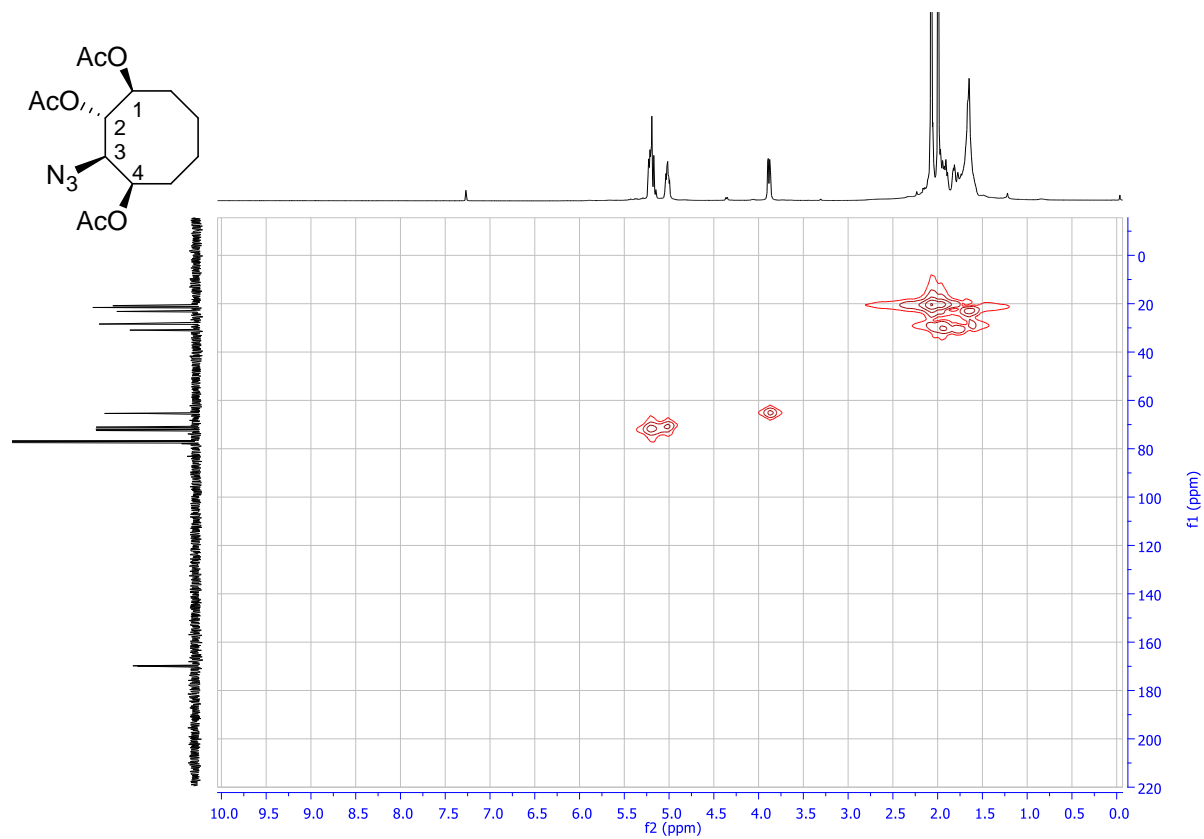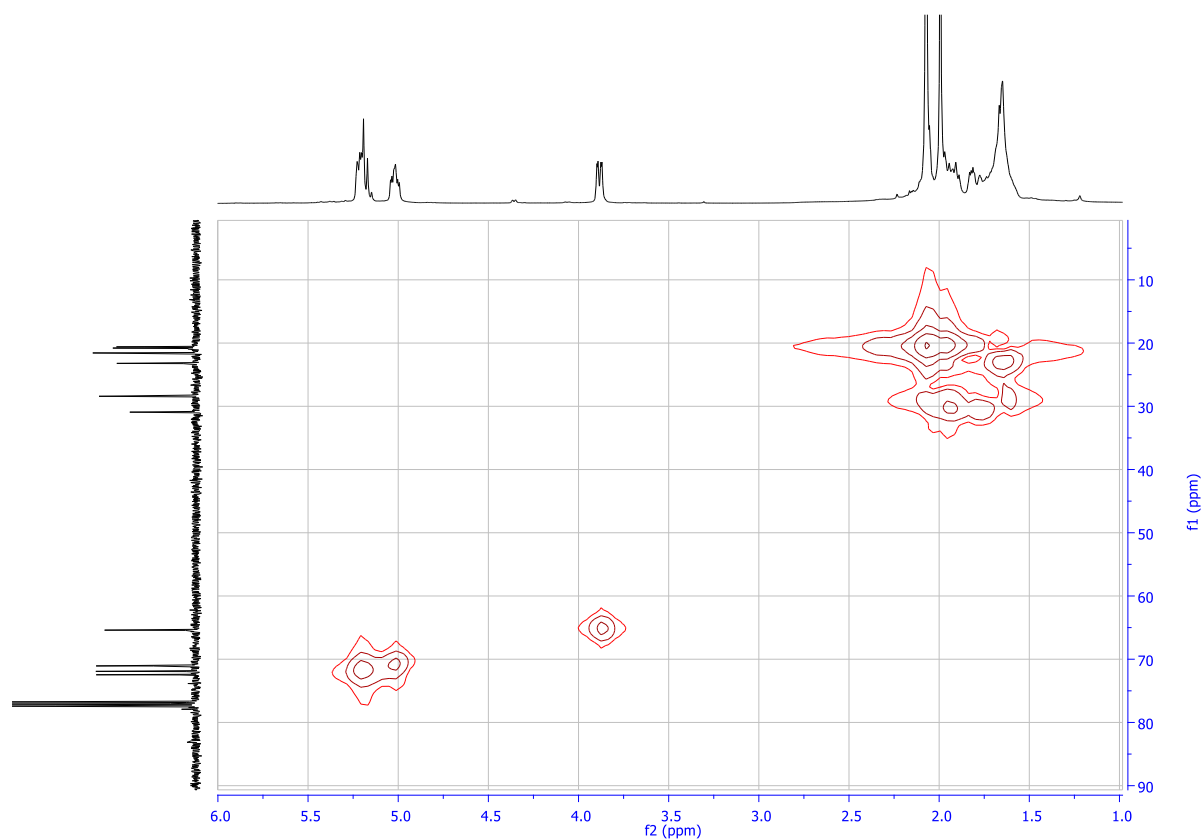

(1*S*(*R*),2*S*(*R*),3*R*(*S*),4*R*(*S*))-3-Azidocyclooctane-1,2,4-triyl triacetate (**11**): COSY

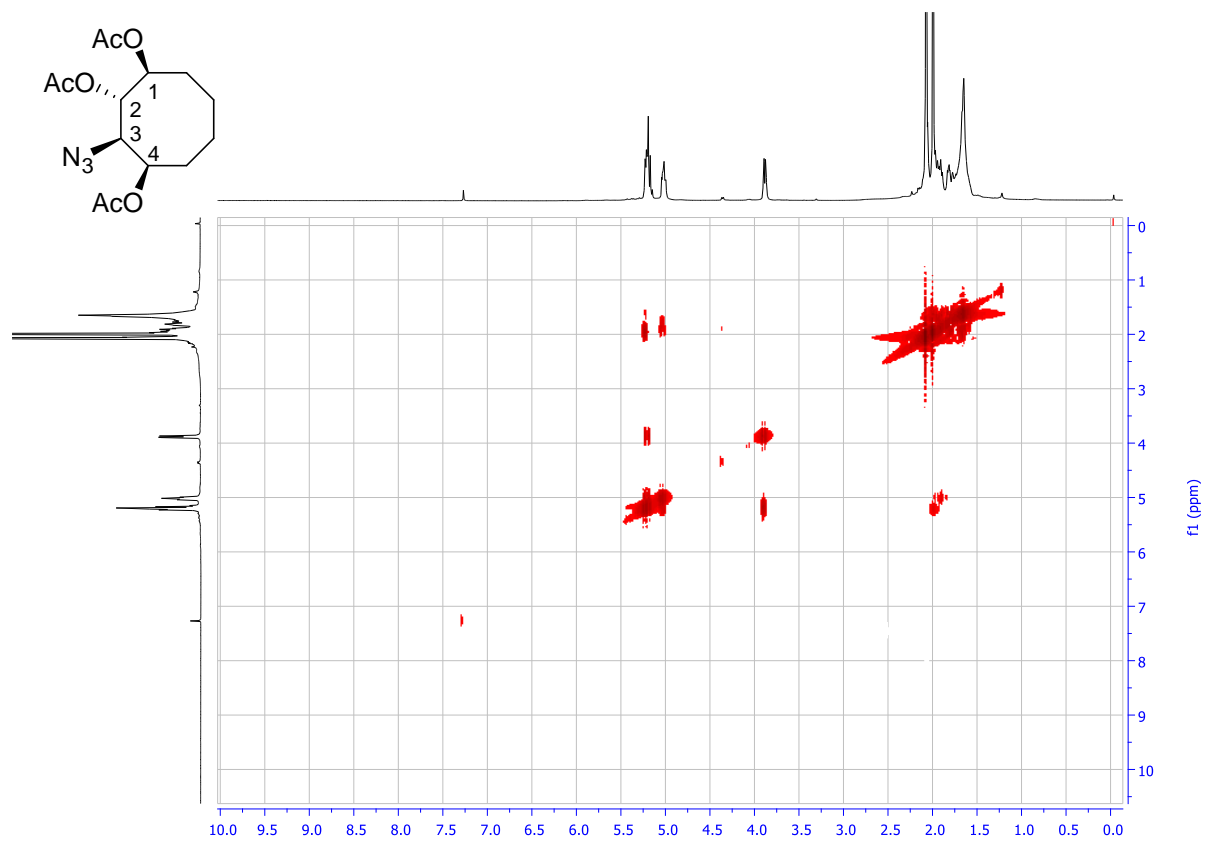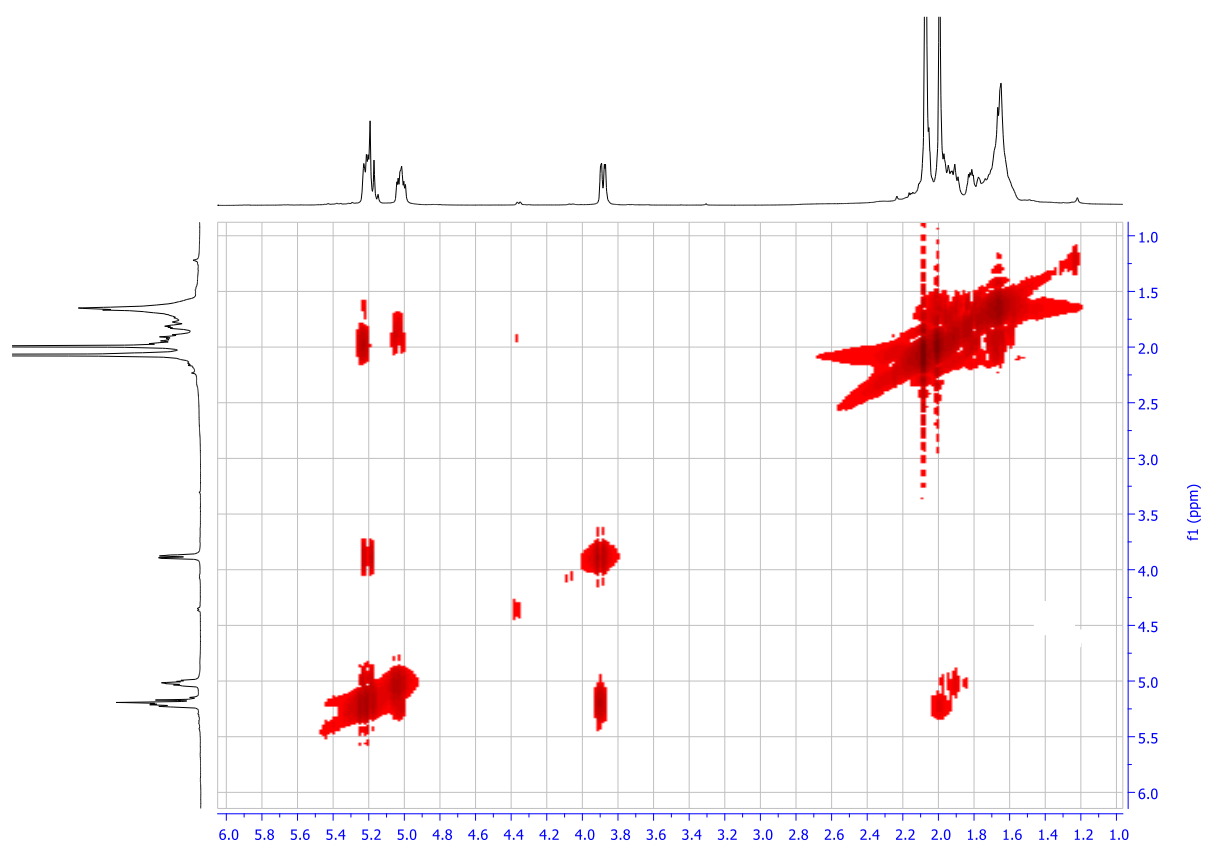

**(1*S*(*R*),2*S*(*R*),3*R*(*S*),4*R*(*S*))-3-Aminocyclooctane-1,2,4-triol (12): CD<sub>3</sub>OD (<sup>1</sup>H NMR and <sup>13</sup>C NMR)**

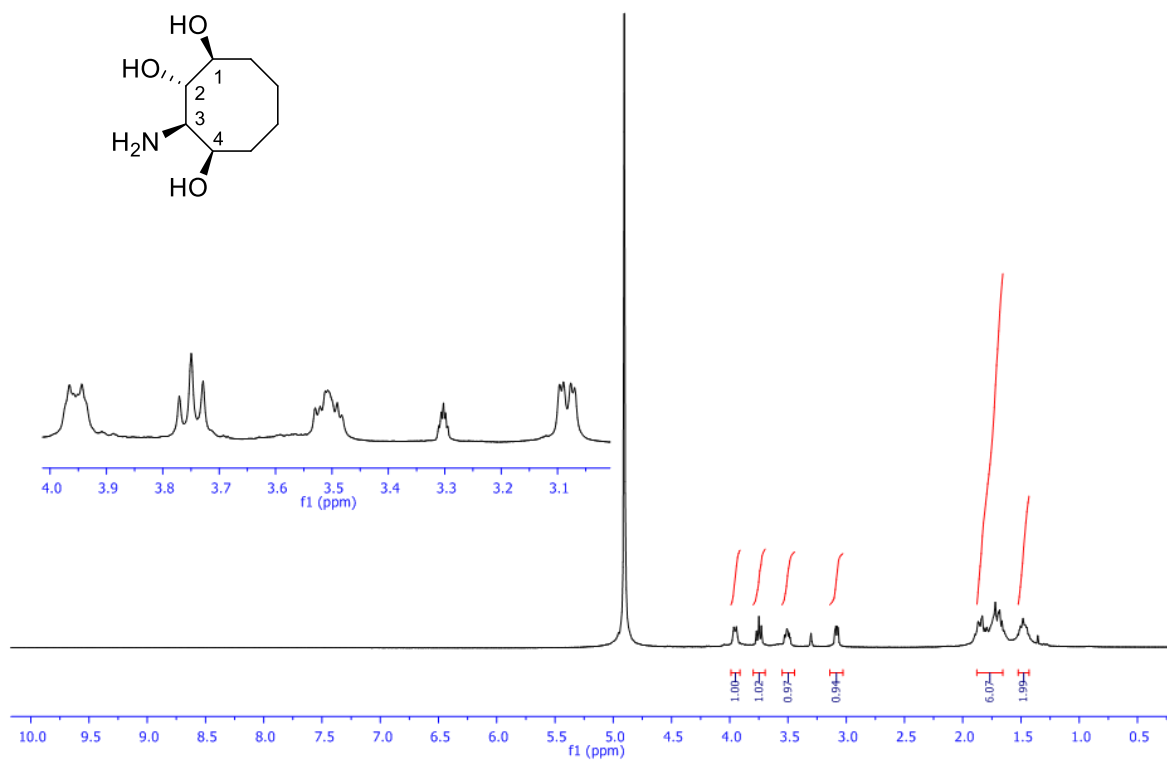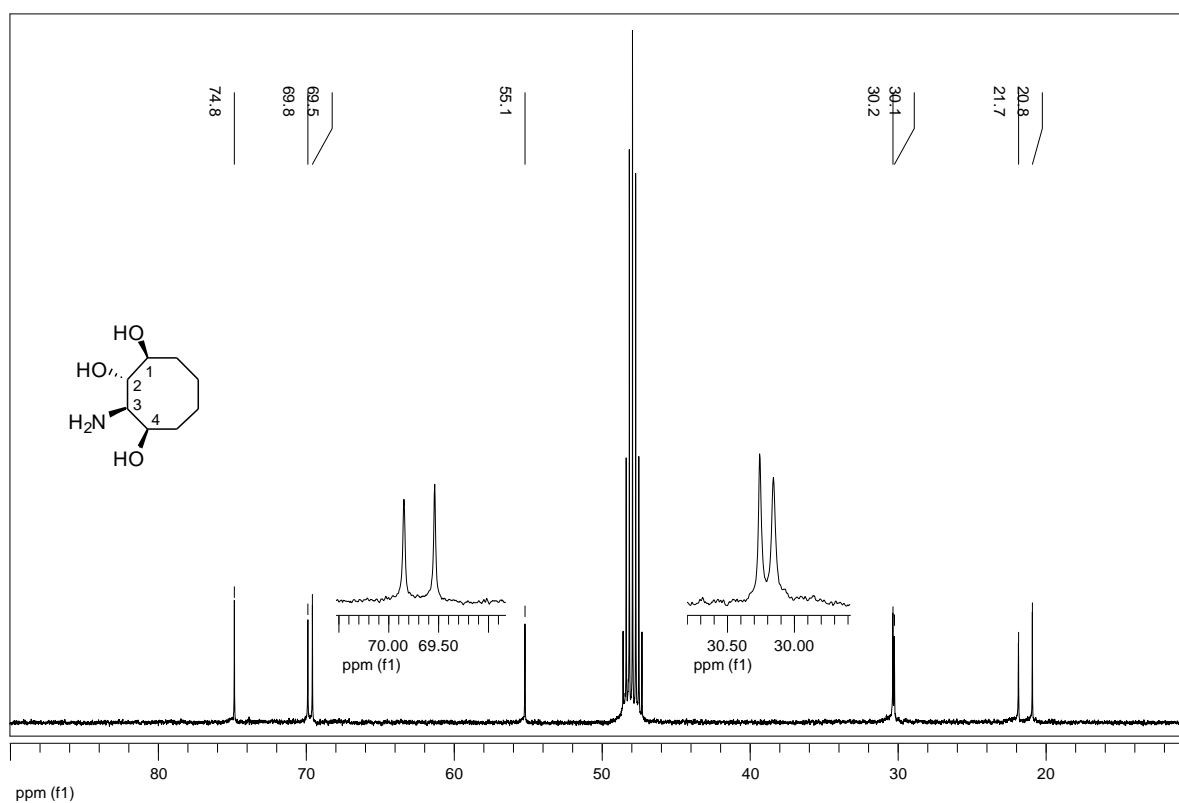

**(1*S*(*R*),2*R*(*S*),3*R*(*S*),4*R*(*S*))-3-Bromocyclooctane-1,2,4-triol (14): CD<sub>3</sub>OD (<sup>1</sup>H NMR and <sup>13</sup>C NMR)**

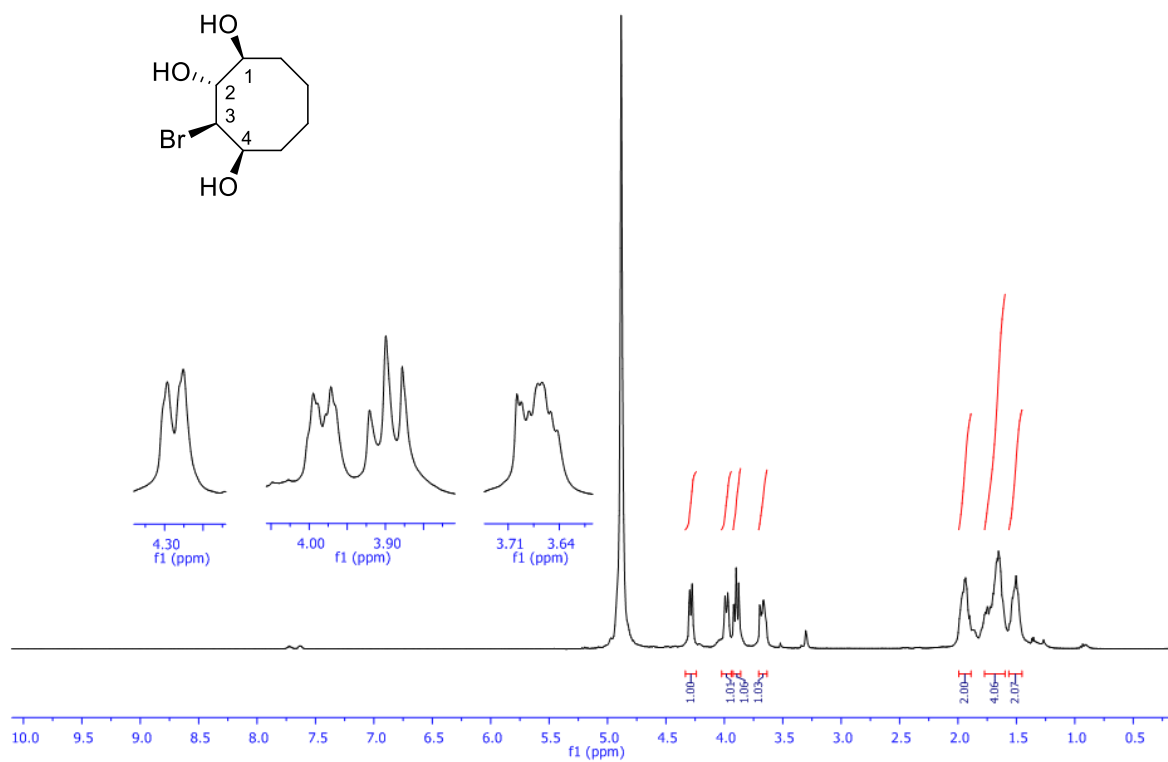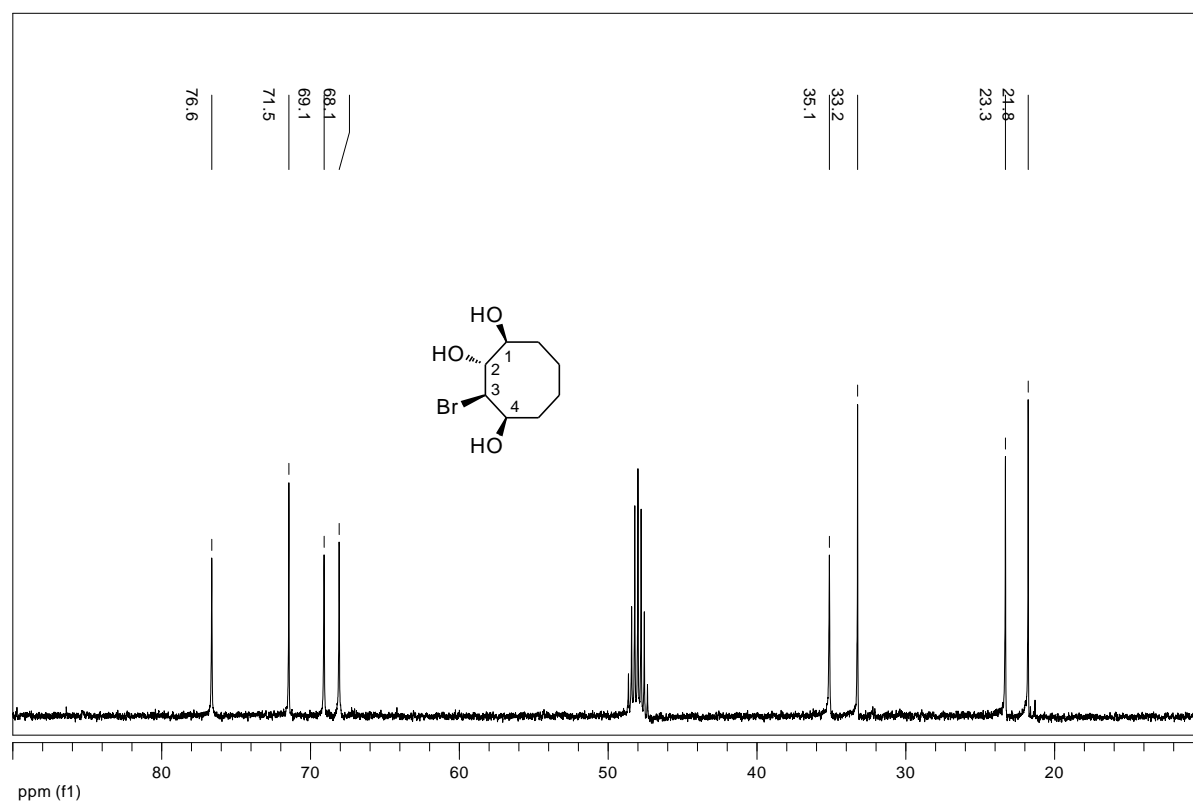

**(1*S*(*R*),2*R*(*S*),3*R*(*S*),4*R*(*S*))-3-Bromocyclooctane-1,2,4-triyl triacetate (15): CDCl<sub>3</sub> (<sup>1</sup>H NMR and double resonance)**

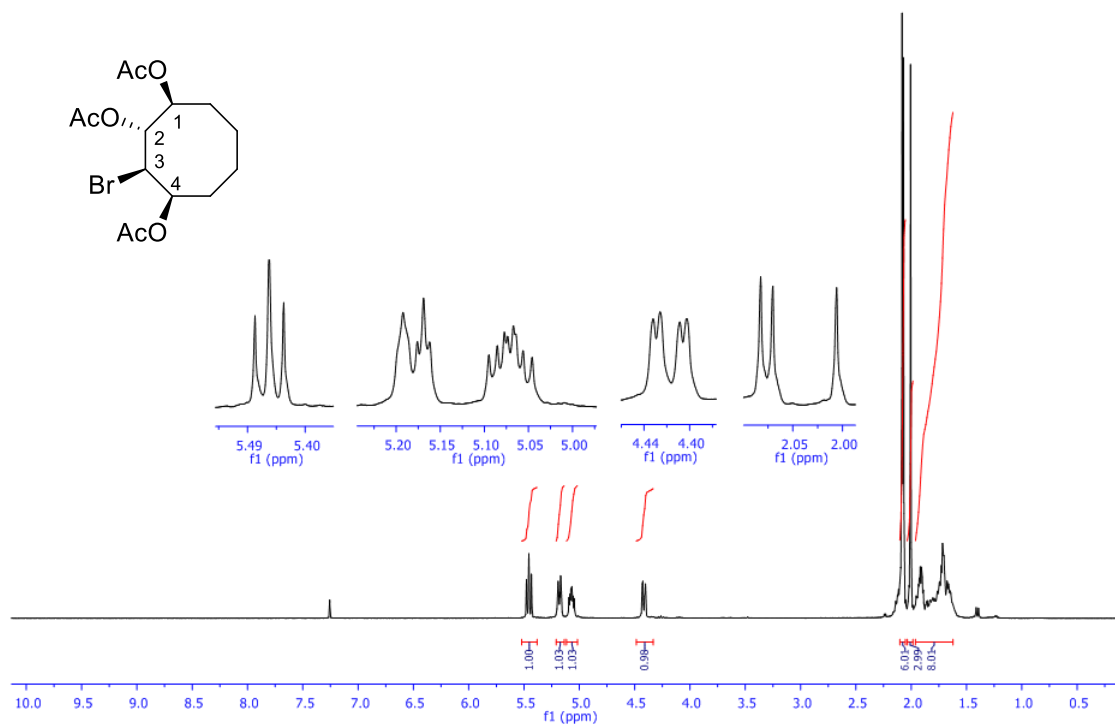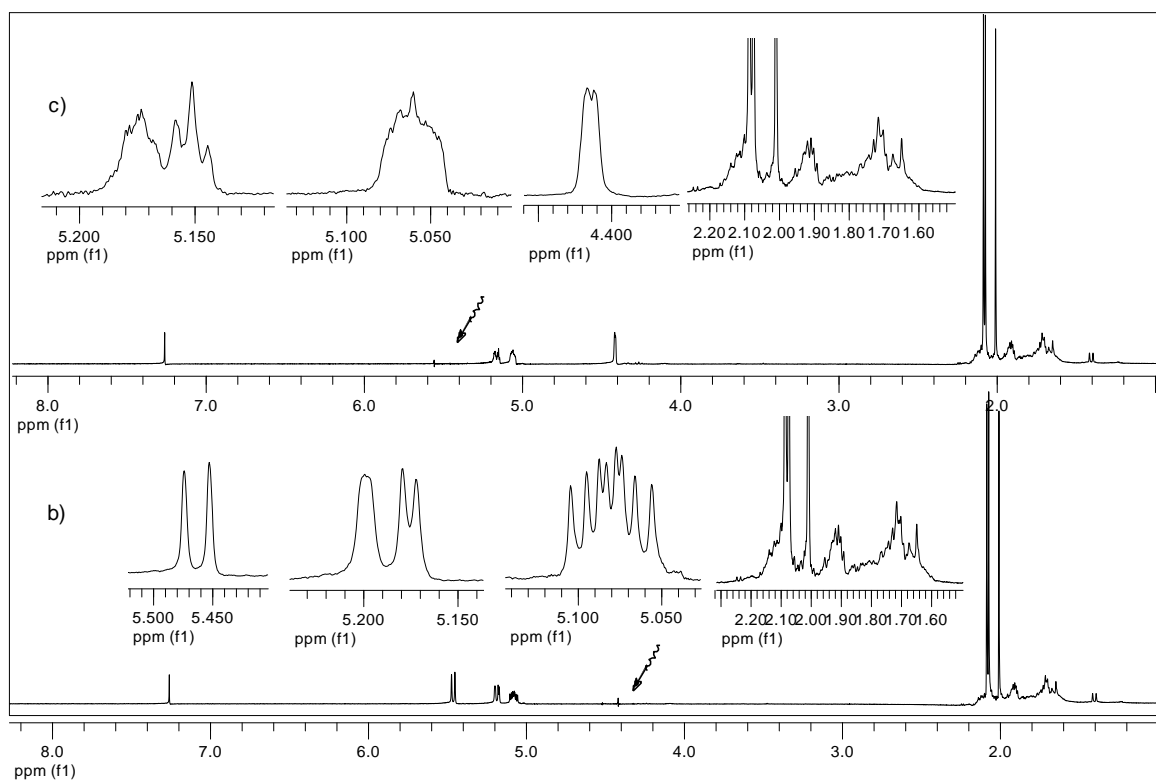



**(1*S*(*R*),2*R*(*S*),3*R*(*S*),4*R*(*S*))-3-Bromocyclooctane-1,2,4-triyl triacetate (15): CDCl<sub>3</sub> (<sup>13</sup>C NMR)**

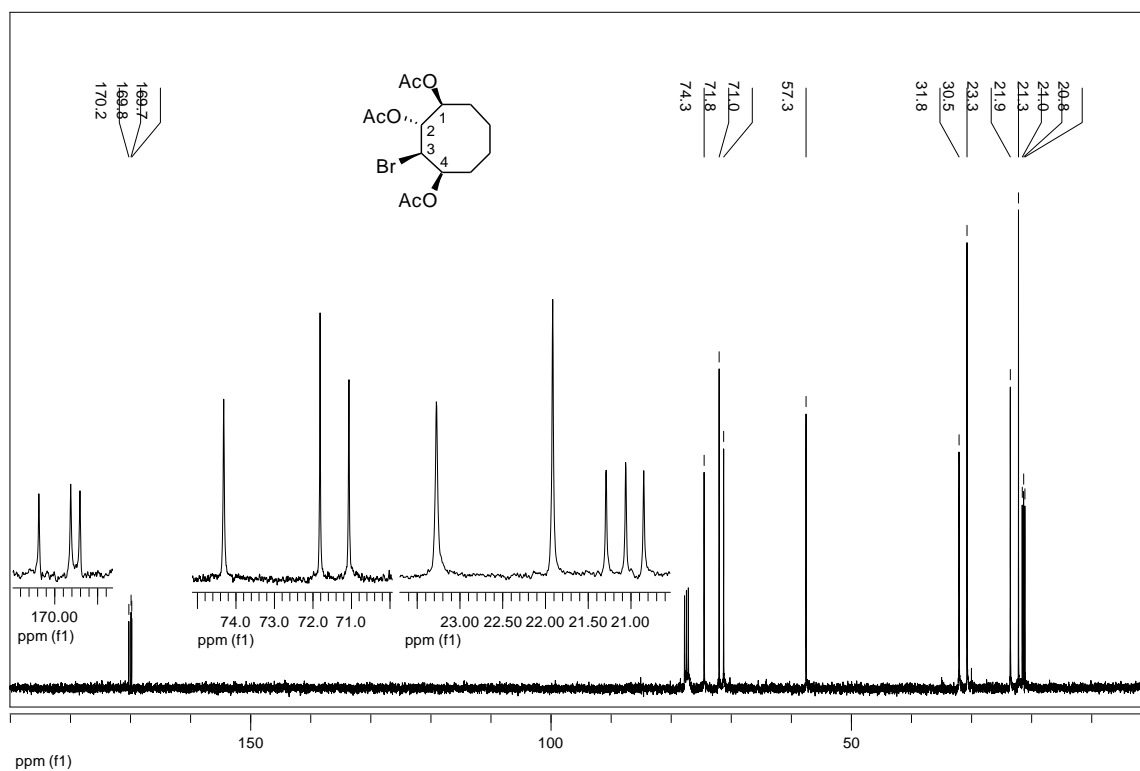

(1*S*),2*S*(*R*),3*S*(*R*),4*R*(*S*))-3-Azidocyclooctane-1,2,4-triol (16): D<sub>2</sub>O (<sup>1</sup>H NMR and <sup>13</sup>C NMR)

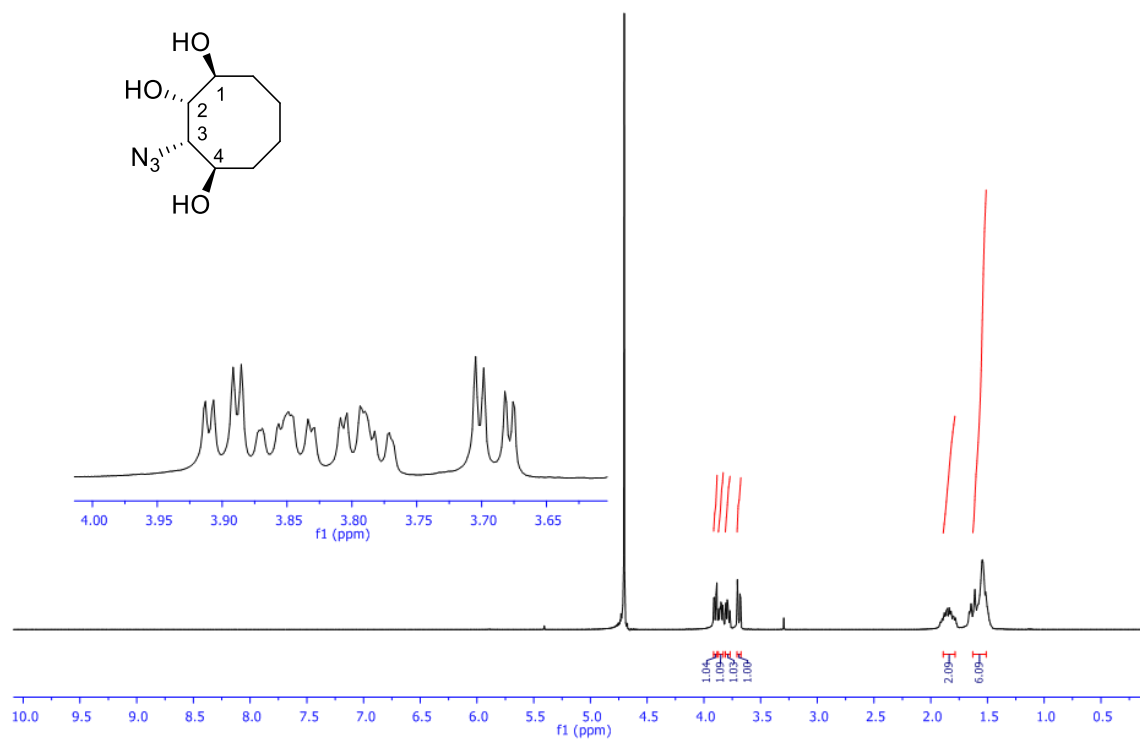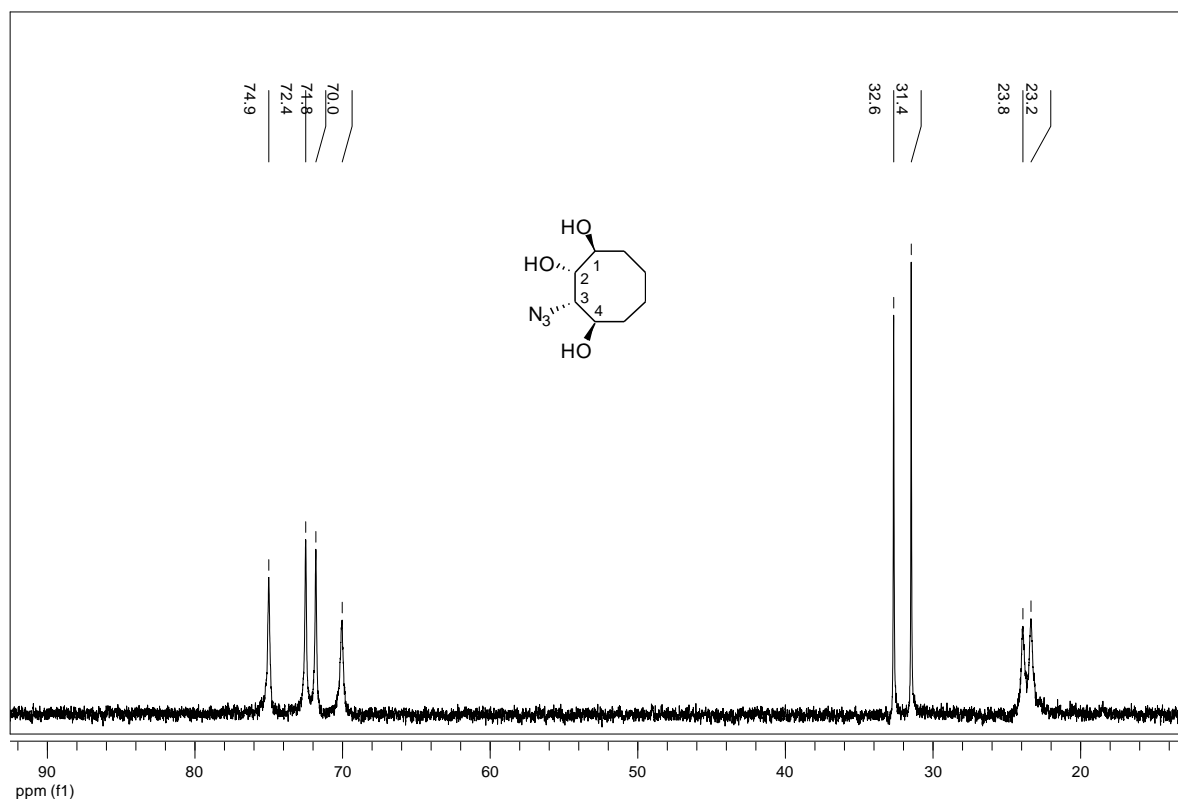

**(1*S*(*R*),2*S*(*R*),3*S*(*R*),4*R*(*S*))-3-Azidocyclooctane-1,2,4-triyl triacetate (17): CDCl<sub>3</sub> (<sup>1</sup>H NMR and double resonance)**

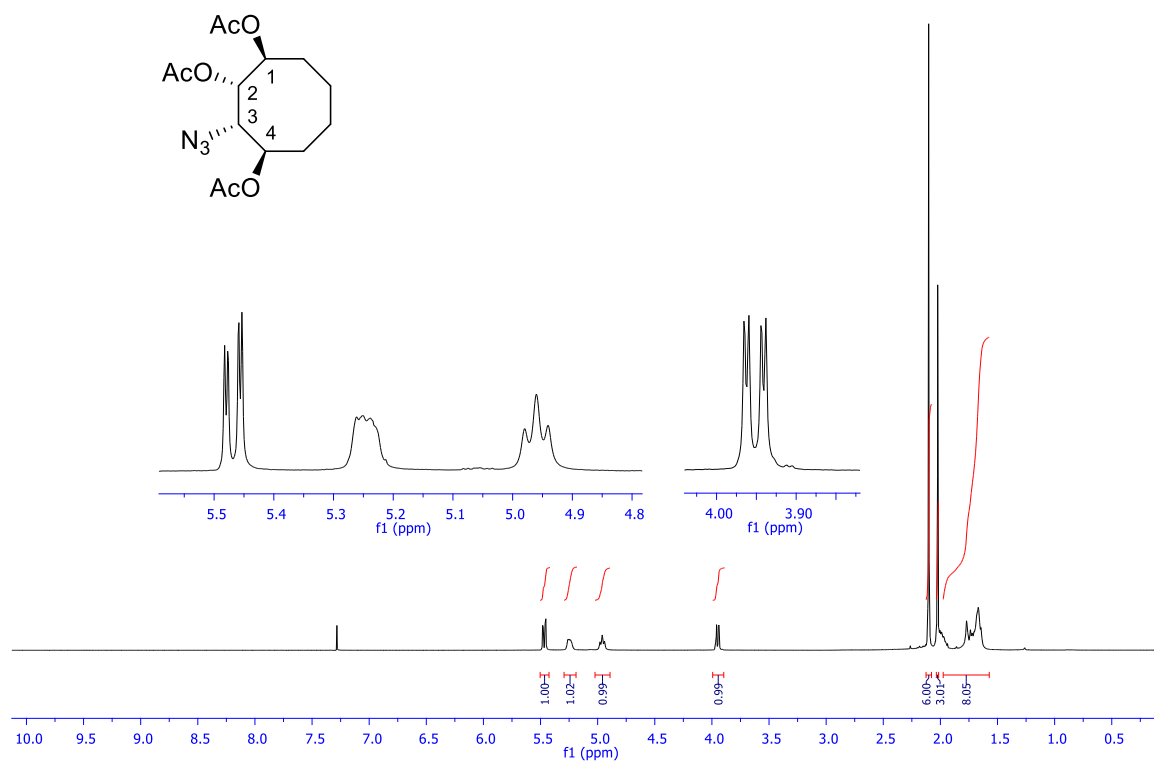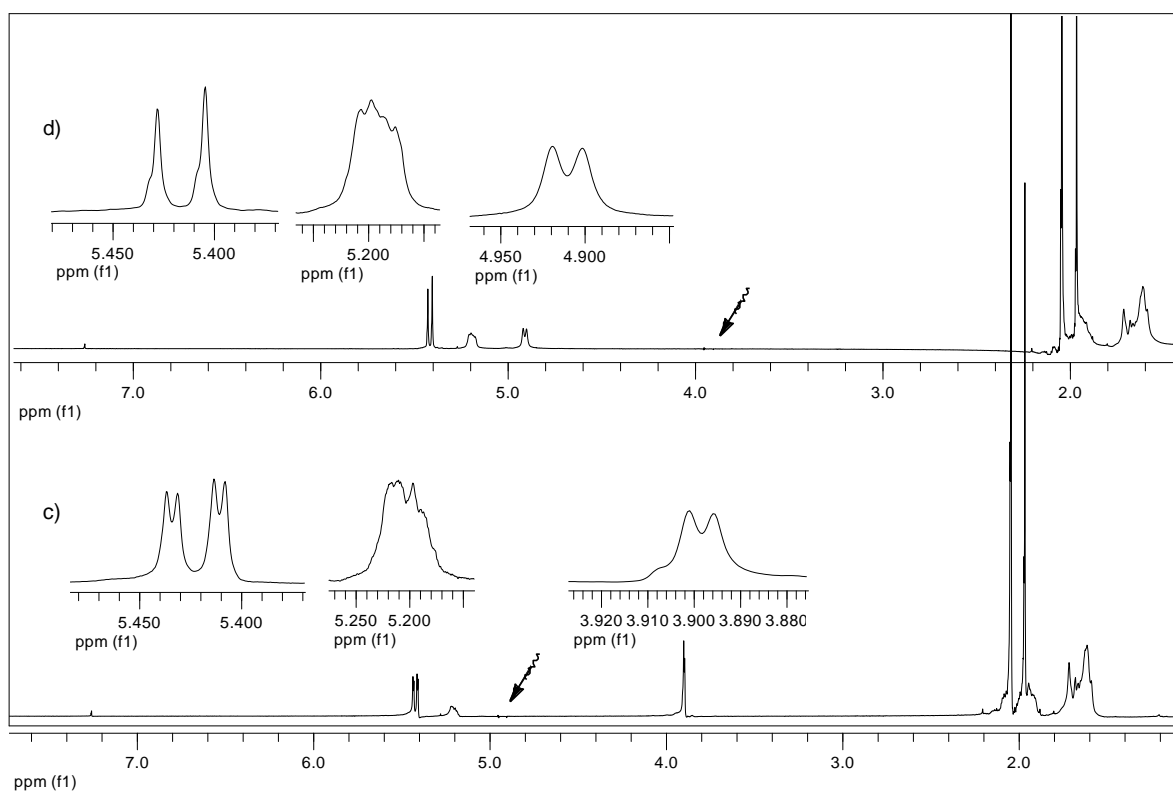

(1*S*(*R*),2*S*(*R*),3*S*(*R*),4*R*(*S*))-3-Azidocyclooctane-1,2,4-triyl triacetate (**17**): CDCl<sub>3</sub> (<sup>13</sup>C NMR)

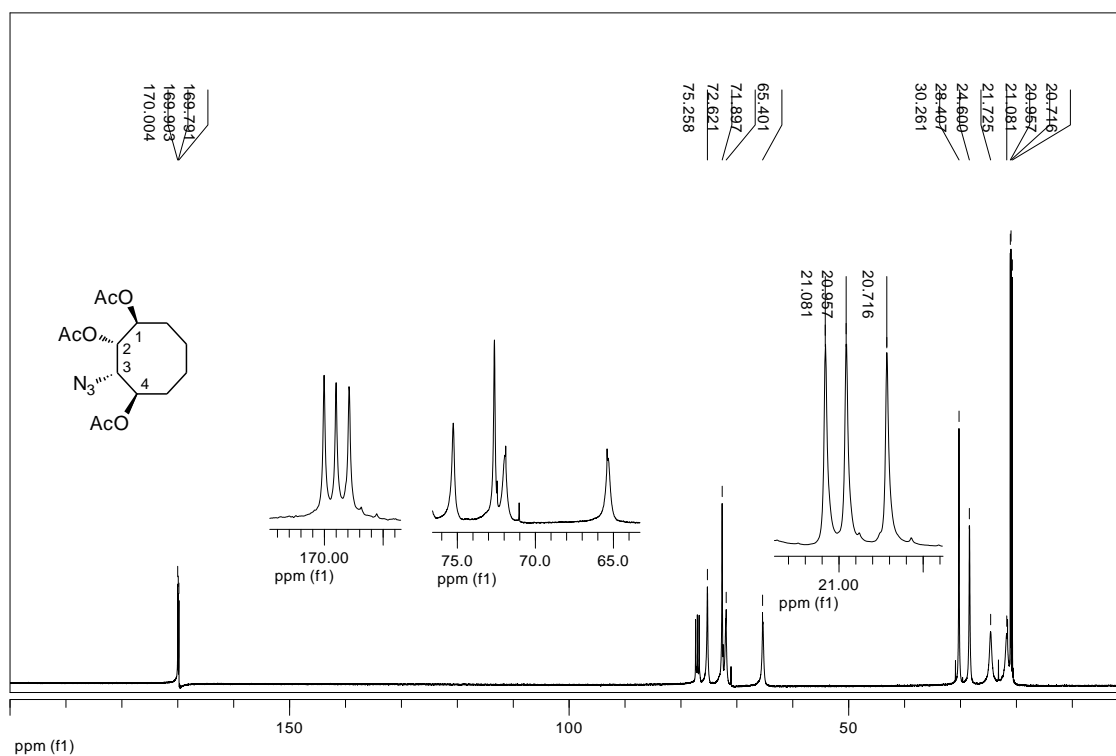

(1*S*(*R*),2*S*(*R*),3*S*(*R*),4*R*(*S*))-3-Azidocyclooctane-1,2,4-triyl triacetate (**17**): CDCl<sub>3</sub>-HMQC

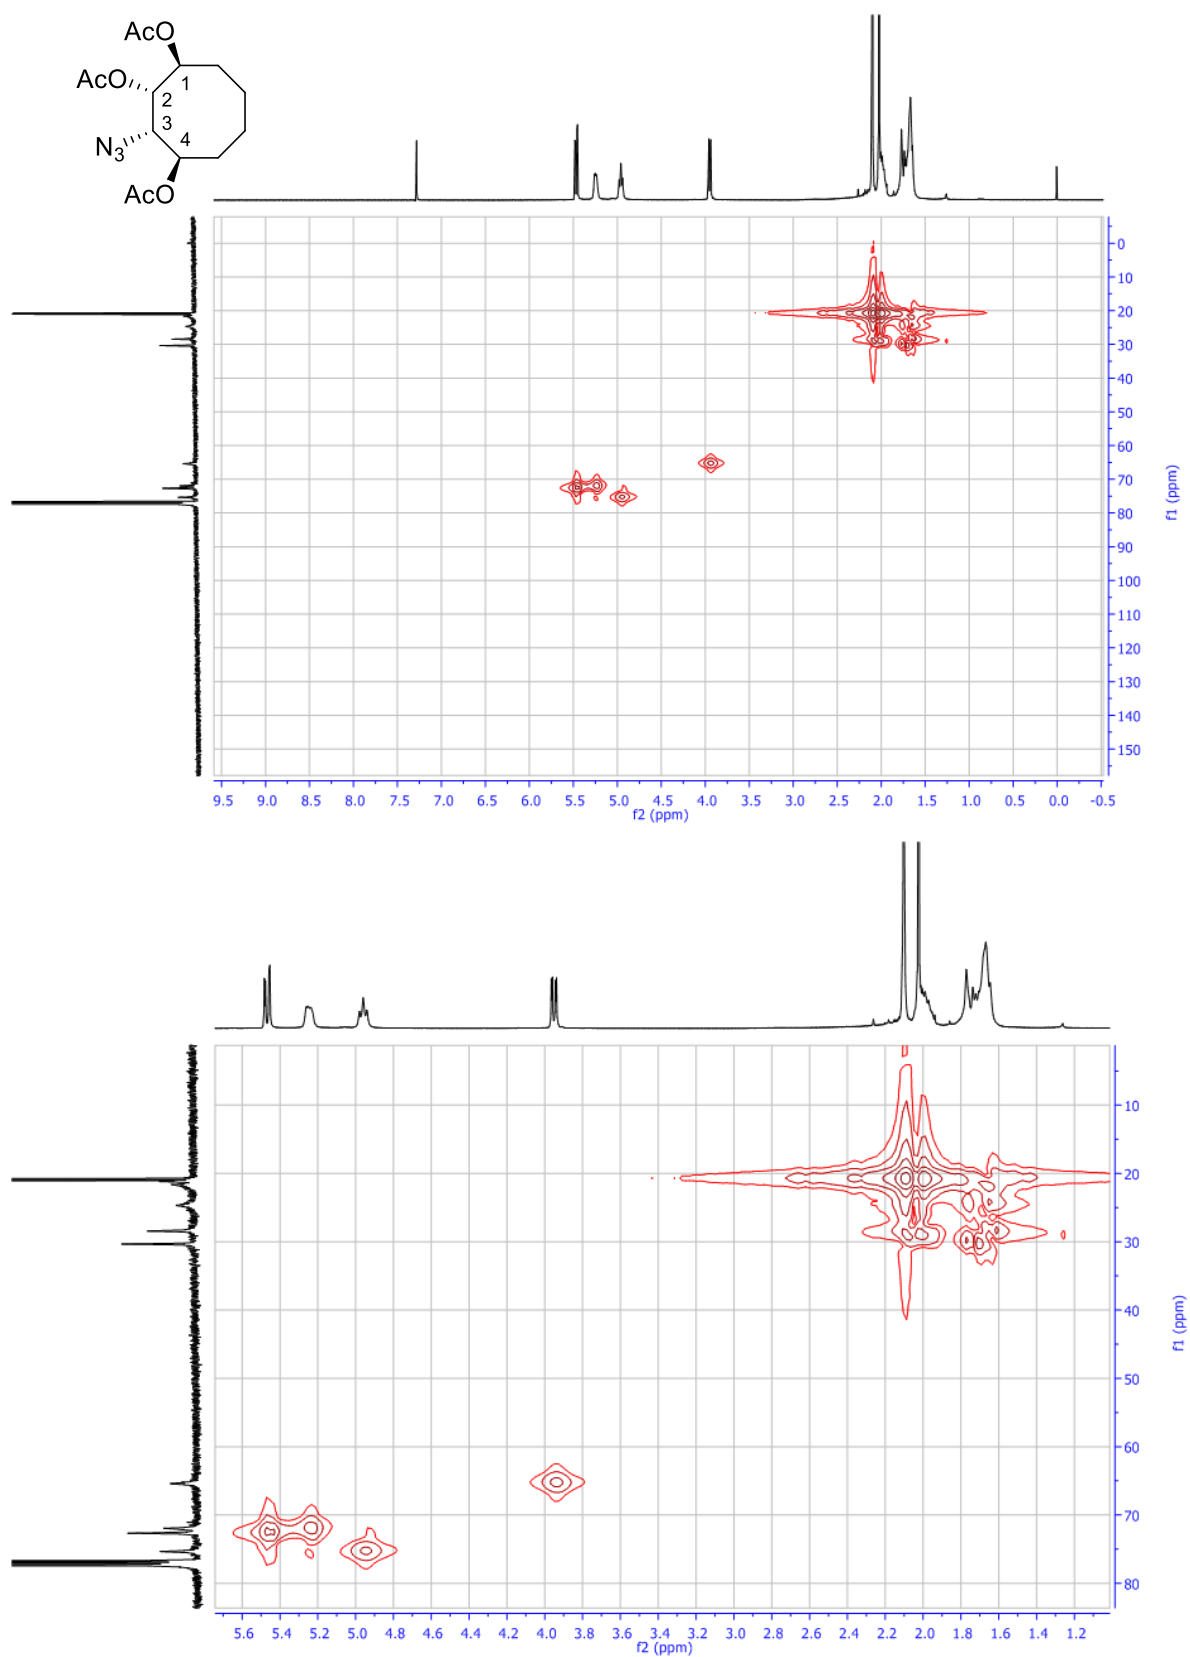

(1*S*(*R*),2*S*(*R*),3*S*(*R*),4*R*(*S*))-3-Azidocyclooctane-1,2,4-triyl triacetate (**17**): CDCl<sub>3</sub>-COSY

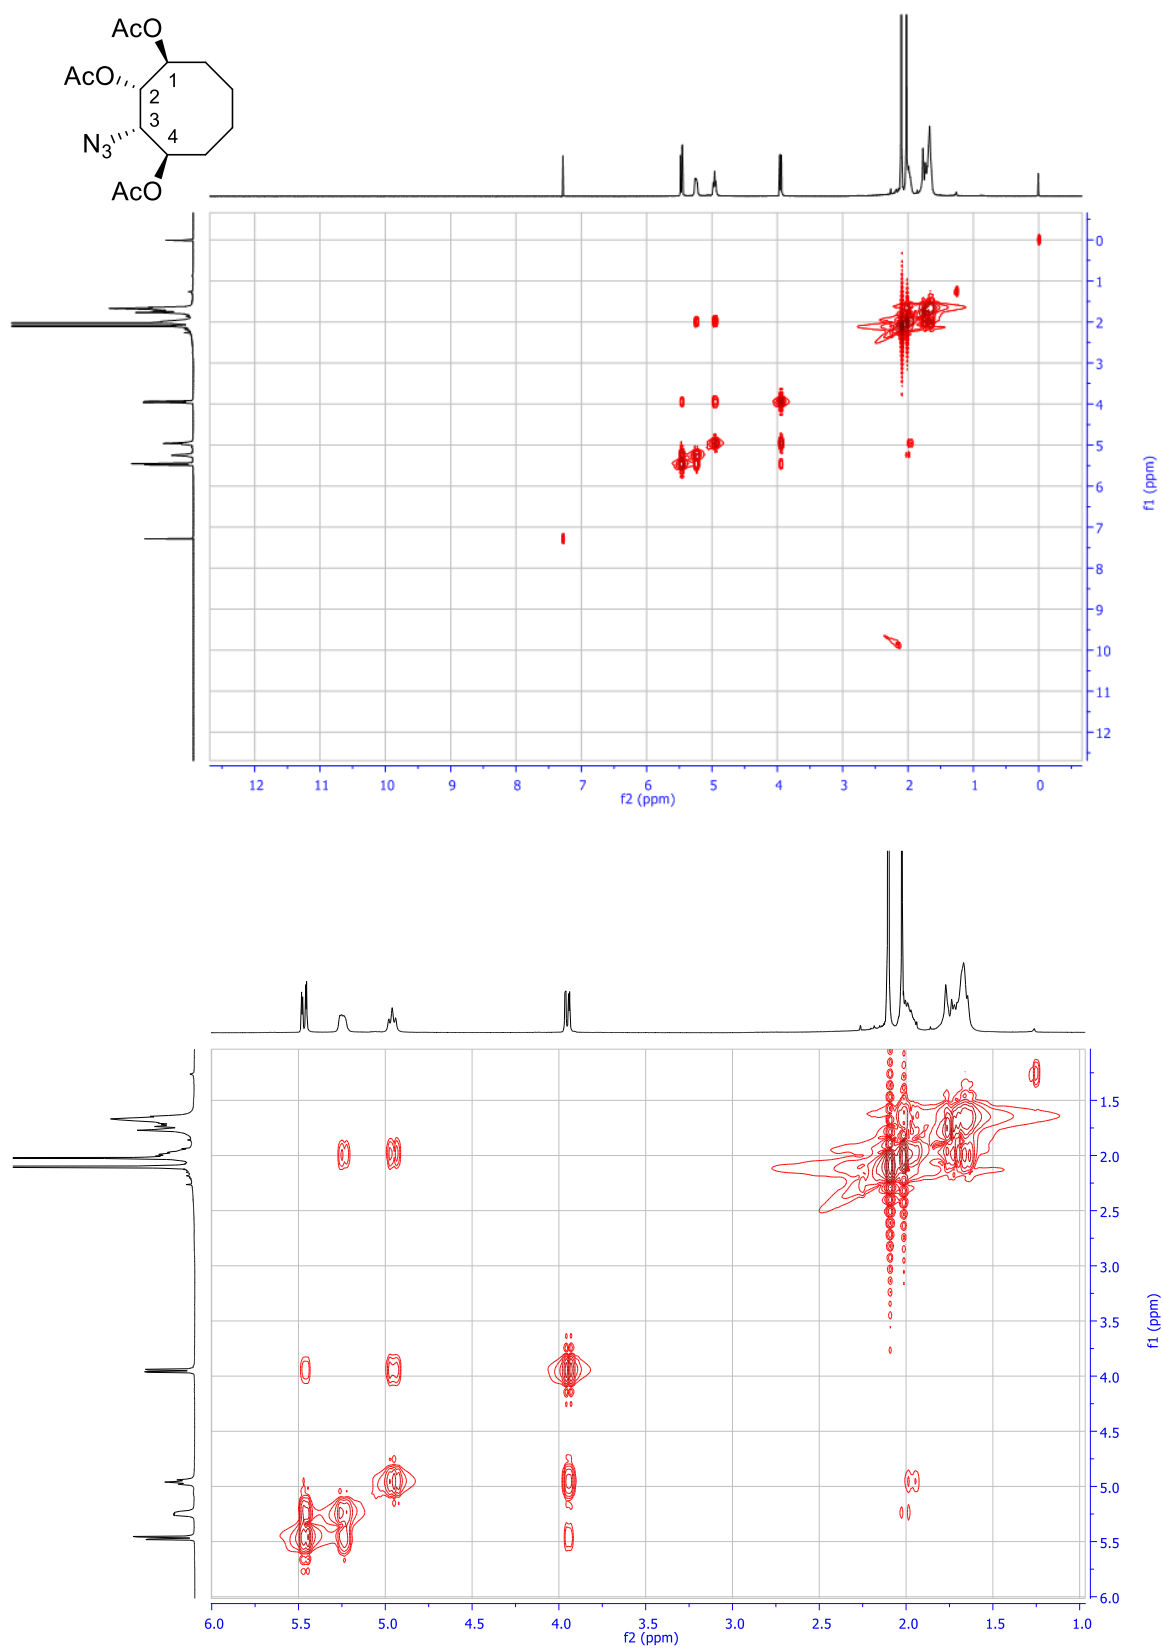

**(1*S*),2*S*),3*S*),4*R*)-3-Aminocyclooctane-1,2,4-triol (18): D<sub>2</sub>O (<sup>1</sup>H NMR and <sup>13</sup>C NMR)**

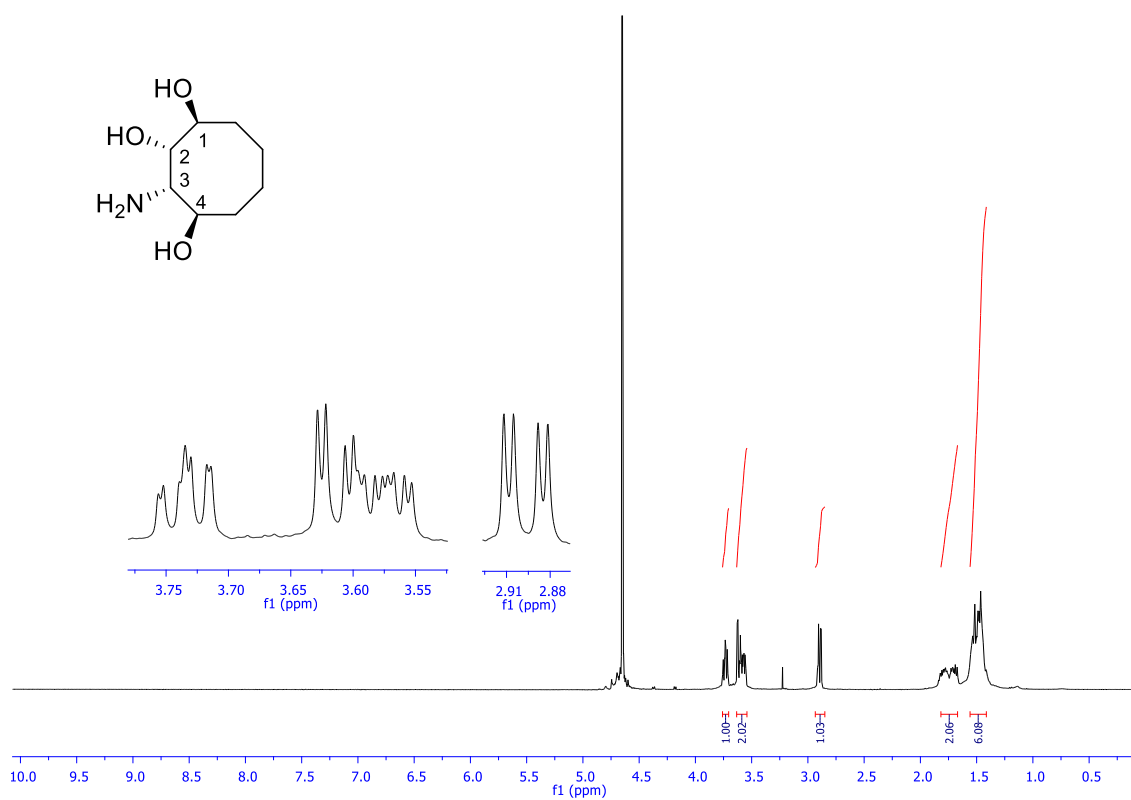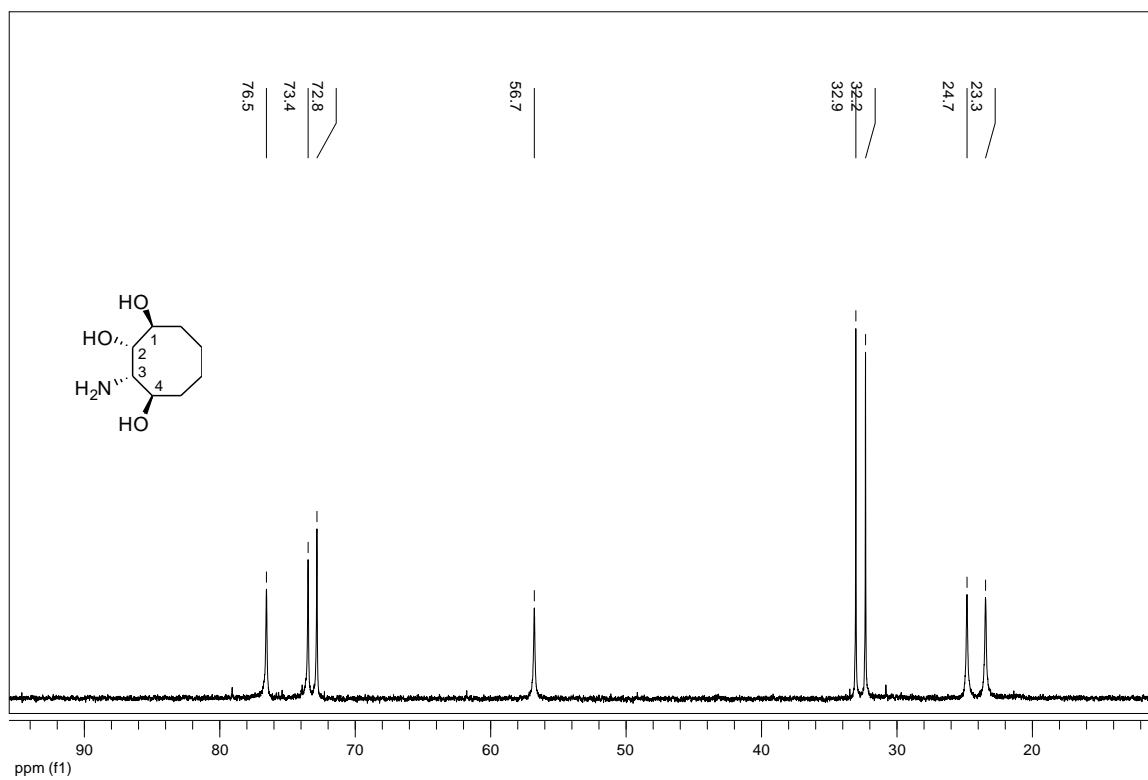

**(1*S*),2*R*),3*R*),4*R*)-3-Chlorocyclooctane-1,2,4-triol (19): D<sub>2</sub>O (<sup>1</sup>H NMR and <sup>13</sup>C NMR)**

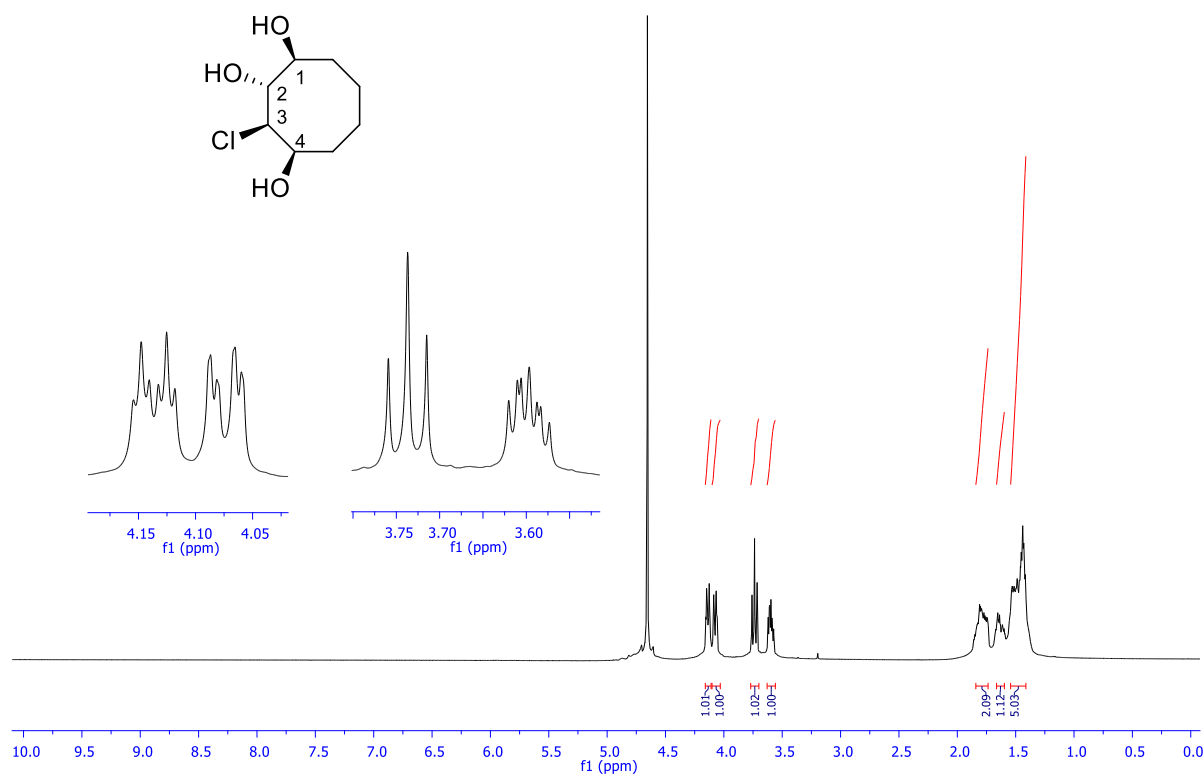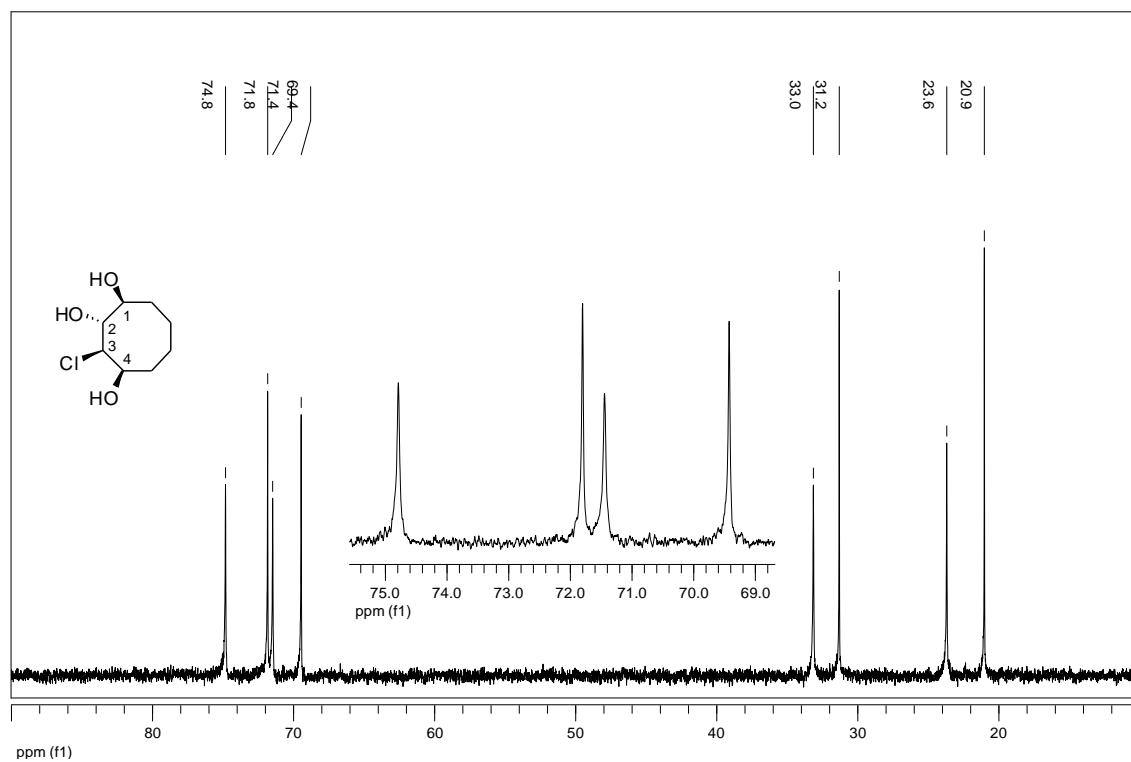



**(1*S*(*R*),2*R*(*S*),3*R*(*S*),4*R*(*S*))-3-Chlorocyclooctane-1,2,4-triyl triacetate (20): CDCl<sub>3</sub> (<sup>1</sup>H NMR and double resonance)**

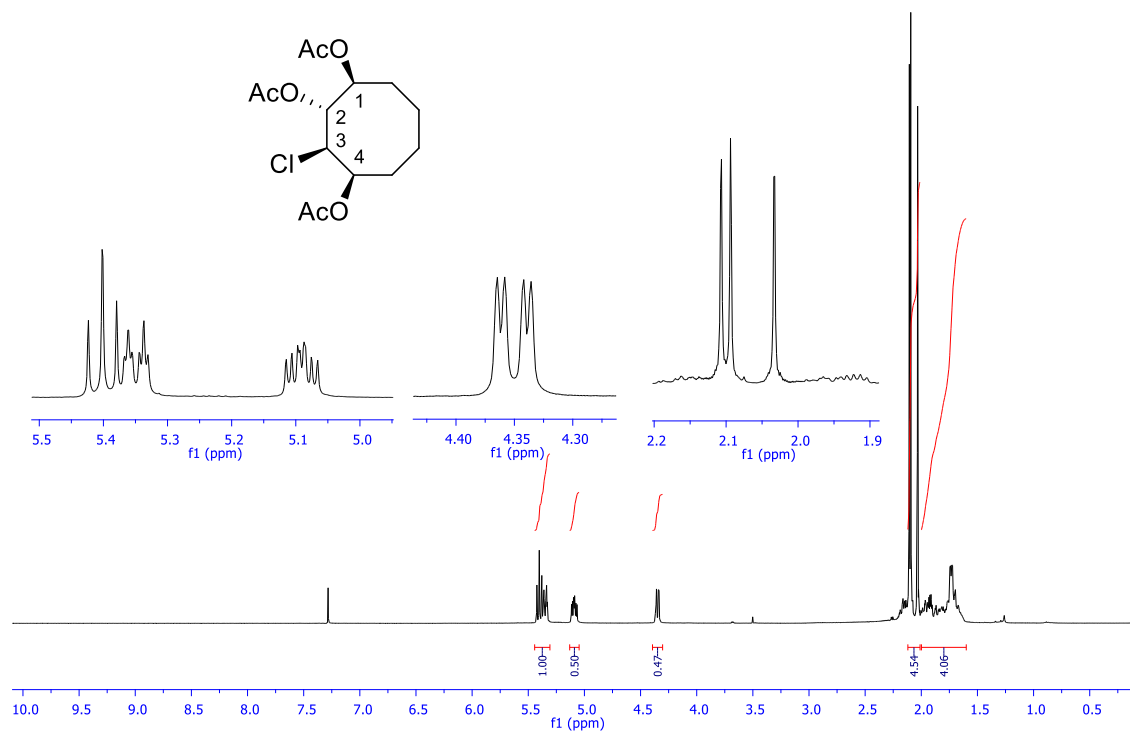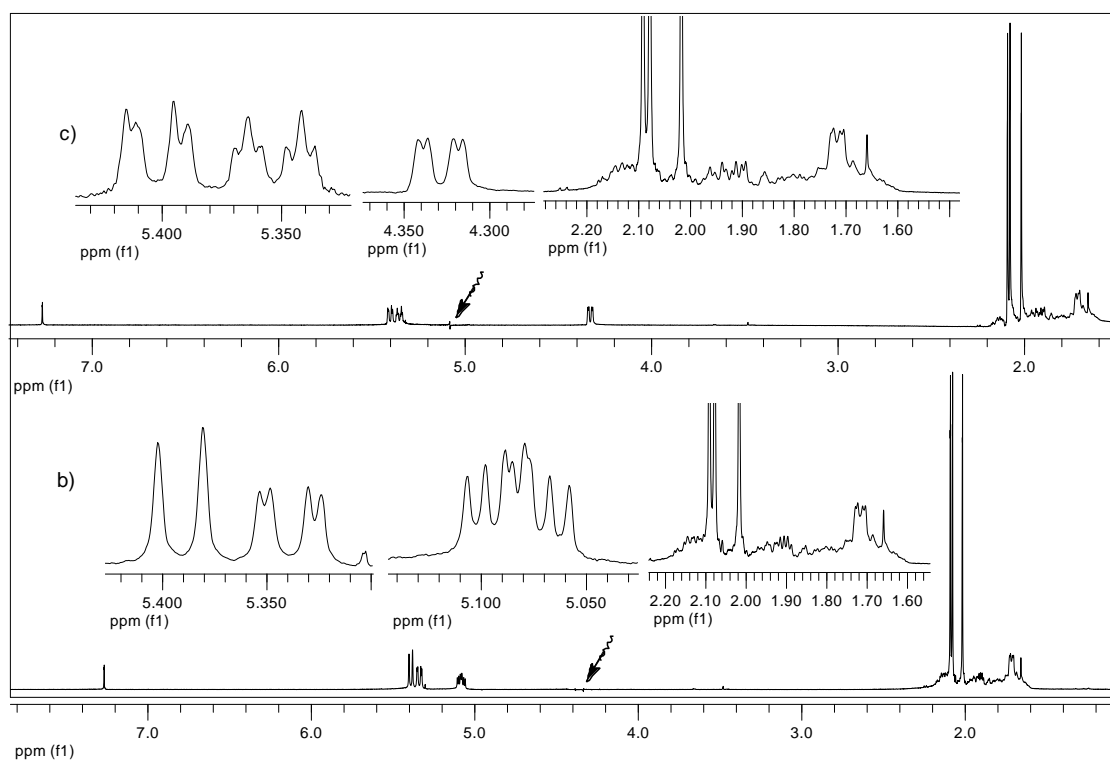

**(1*S*(*R*),2*R*(*S*),3*R*(*S*),4*R*(*S*))-3-Chlorocyclooctane-1,2,4-triyl triacetate (20):** CDCl<sub>3</sub> (<sup>13</sup>C NMR)

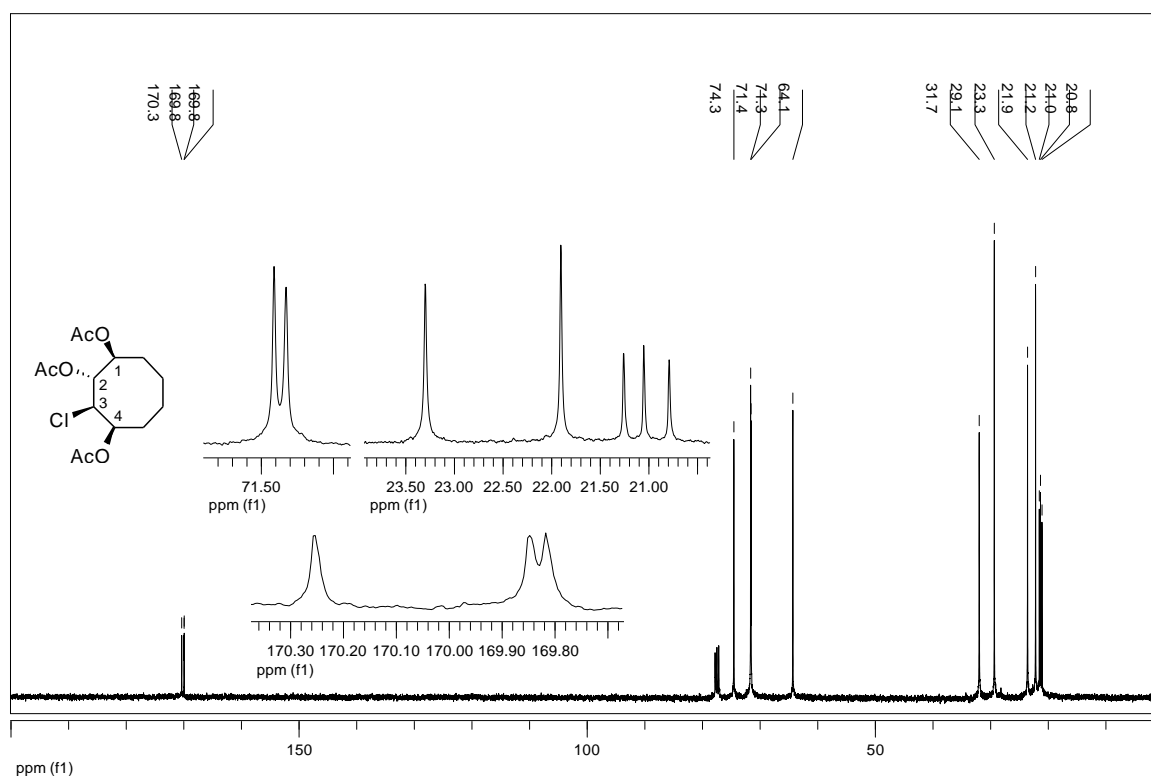

(1*S*(*R*),2*R*(*S*),3*R*(*S*),4*R*(*S*))-3-Chlorocyclooctane-1,2,4-triyl triacetate (**20**): CDCl<sub>3</sub>-HMQC

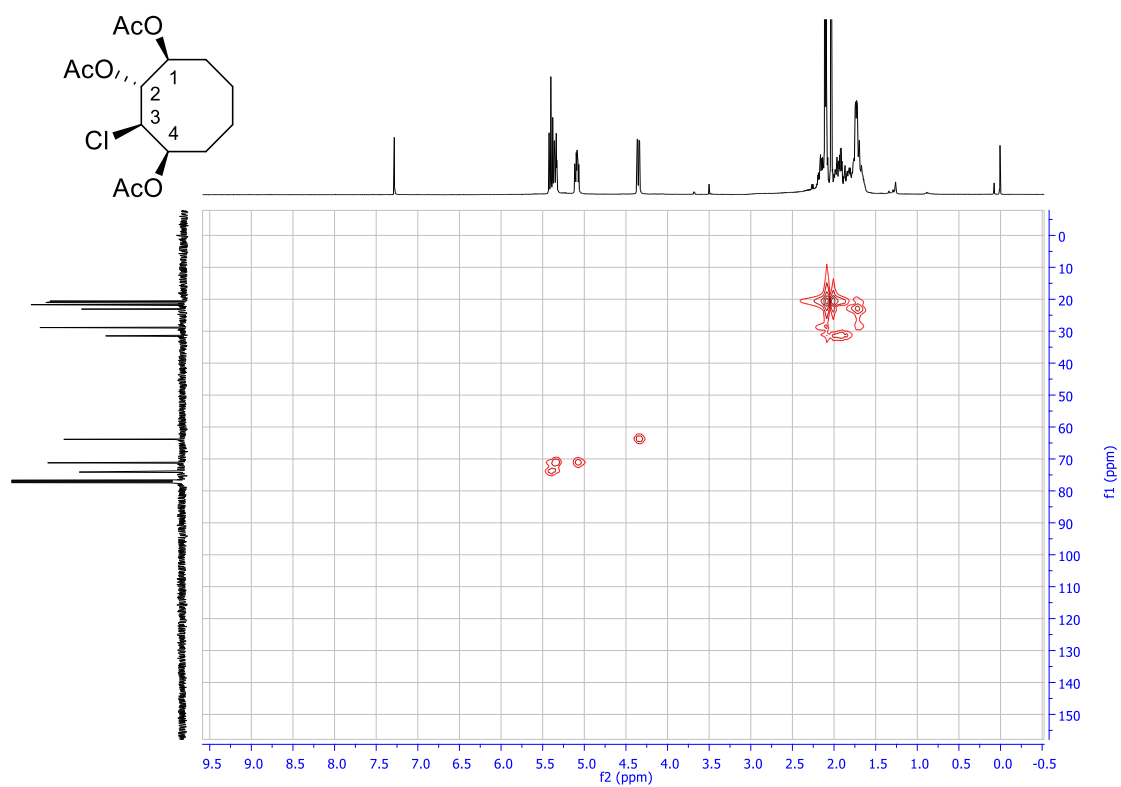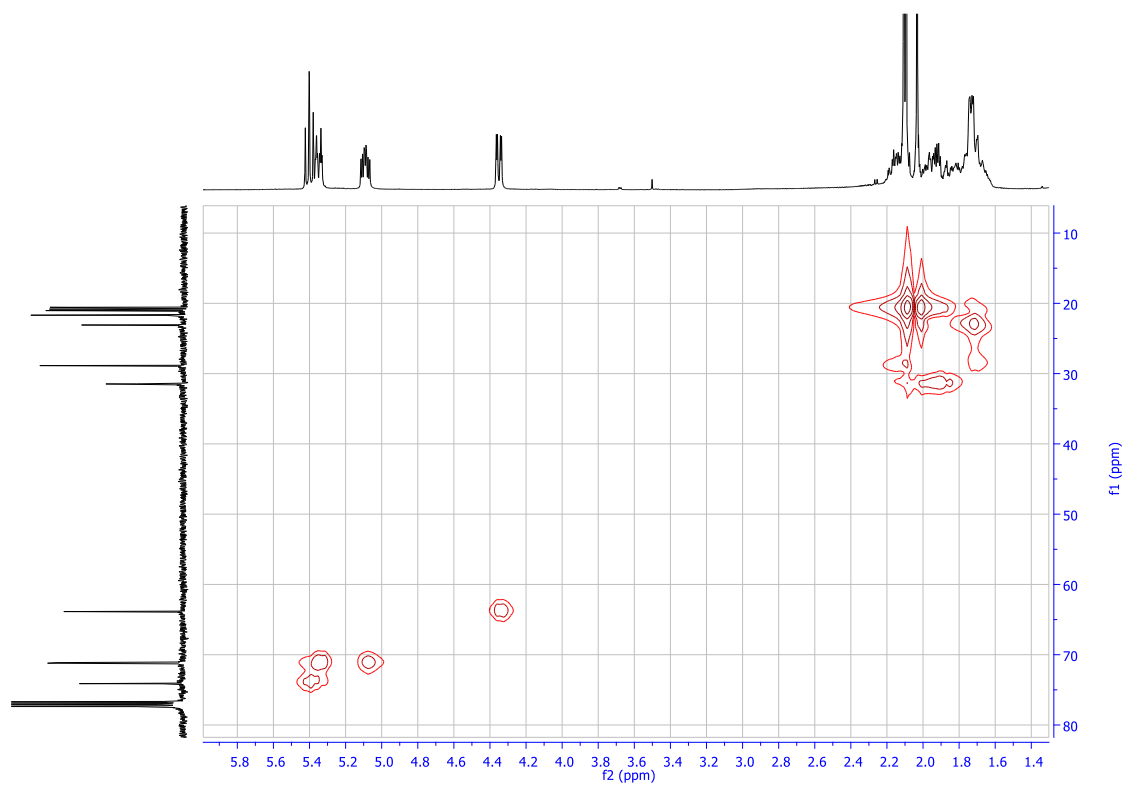

**1*S*(*R*),2*R*(*S*),3*R*(*S*),4*R*(*S*))-3-Chlorocyclooctane-1,2,4-triyl triacetate (**20**): CDCl<sub>3</sub>-COSY**

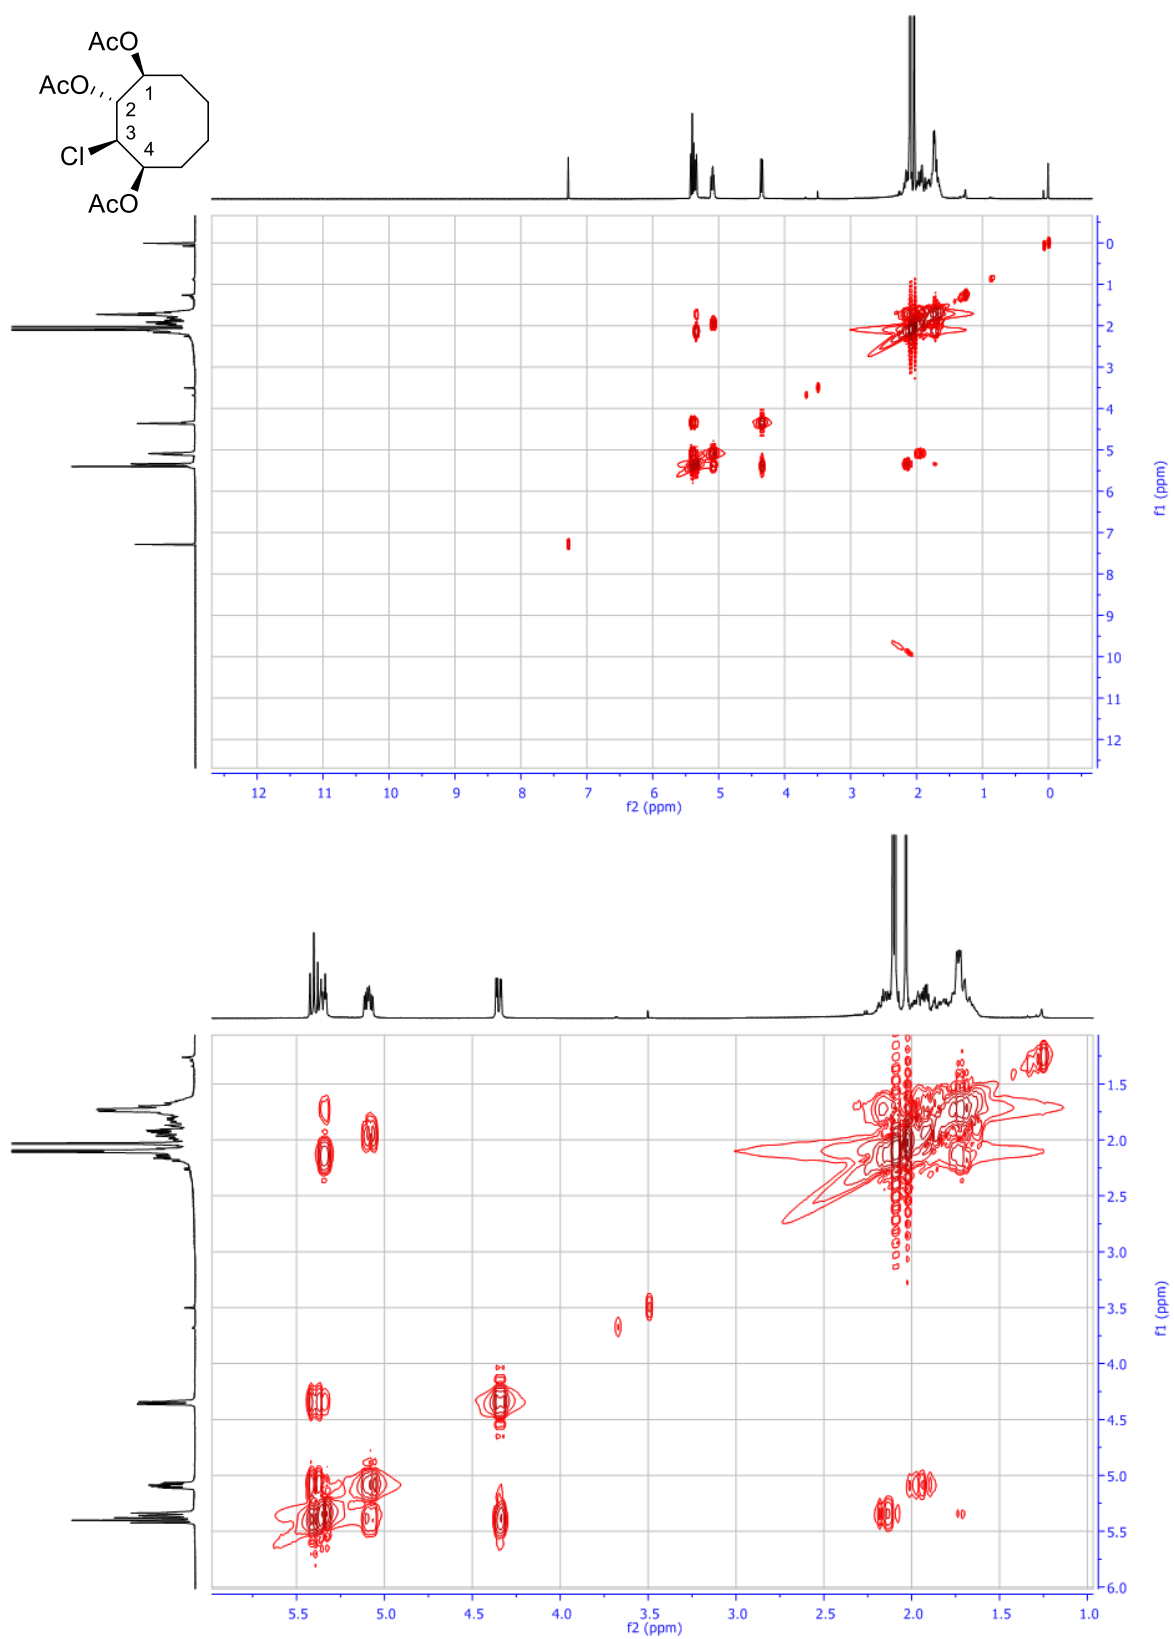

**(1*R*(*S*),2*R*(*S*),3*S*(*R*),4*S*(*R*))-4-Chlorocyclooctane-1,2,3-triol (23): D<sub>2</sub>O (<sup>1</sup>H NMR and <sup>13</sup>C NMR)**

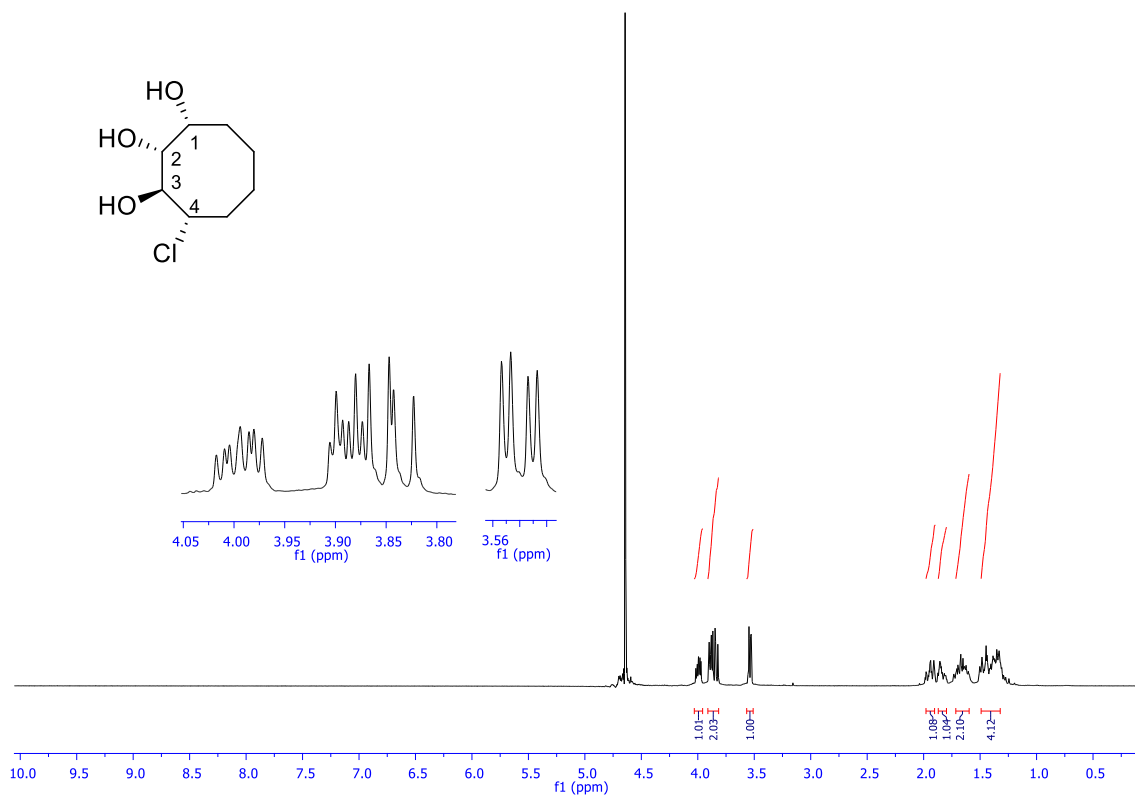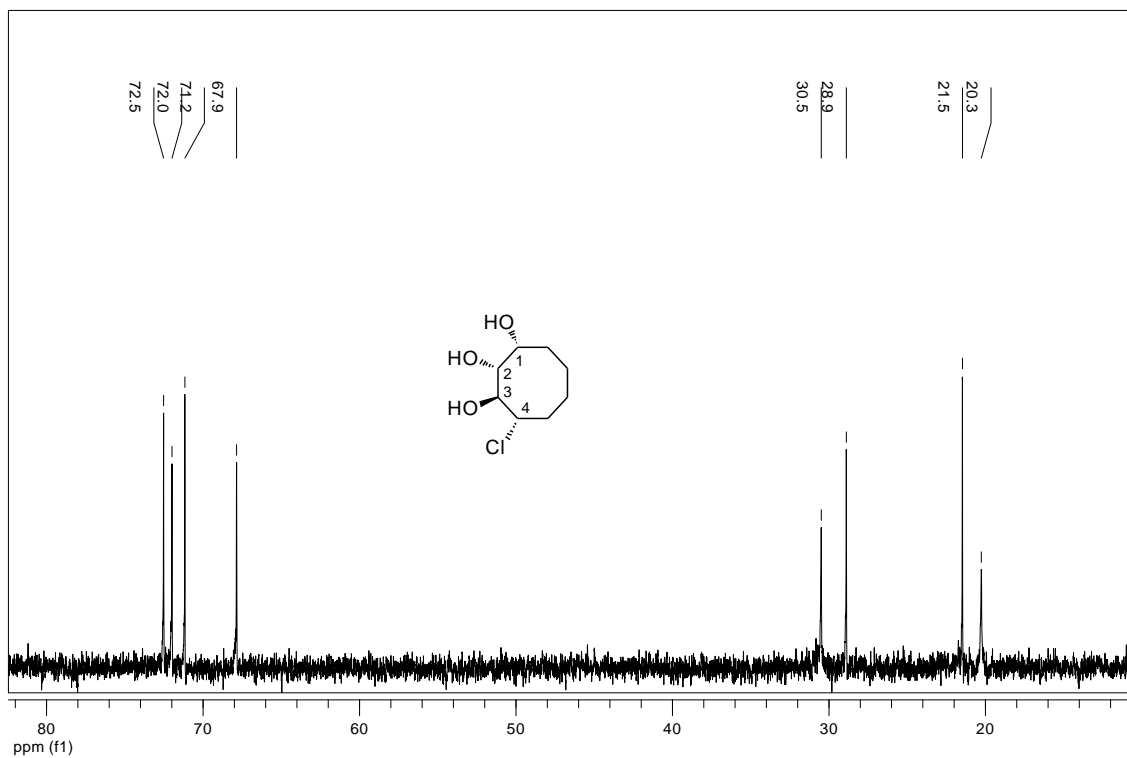

**(1*R*(*S*),2*R*(*S*),3*S*(*R*),4*R*(*S*))-3-Chlorocyclooctane-1,2,4-triol (24):** D<sub>2</sub>O (<sup>1</sup>H NMR and <sup>13</sup>C NMR)

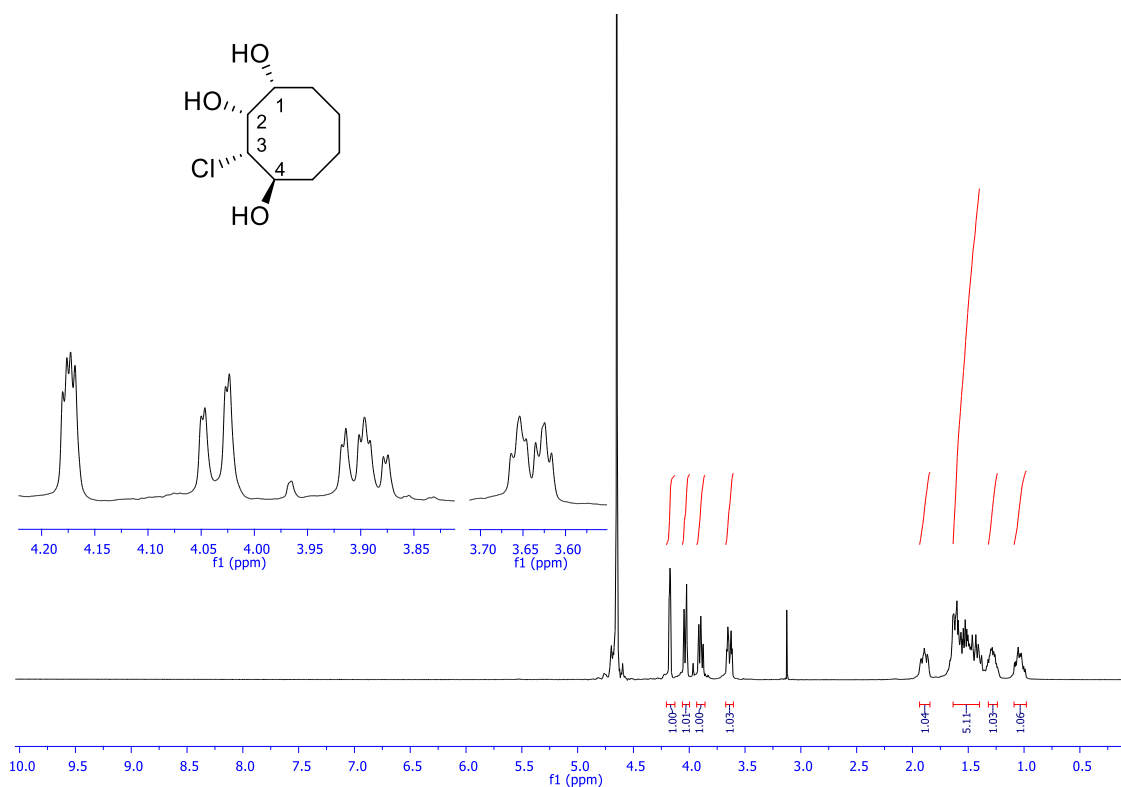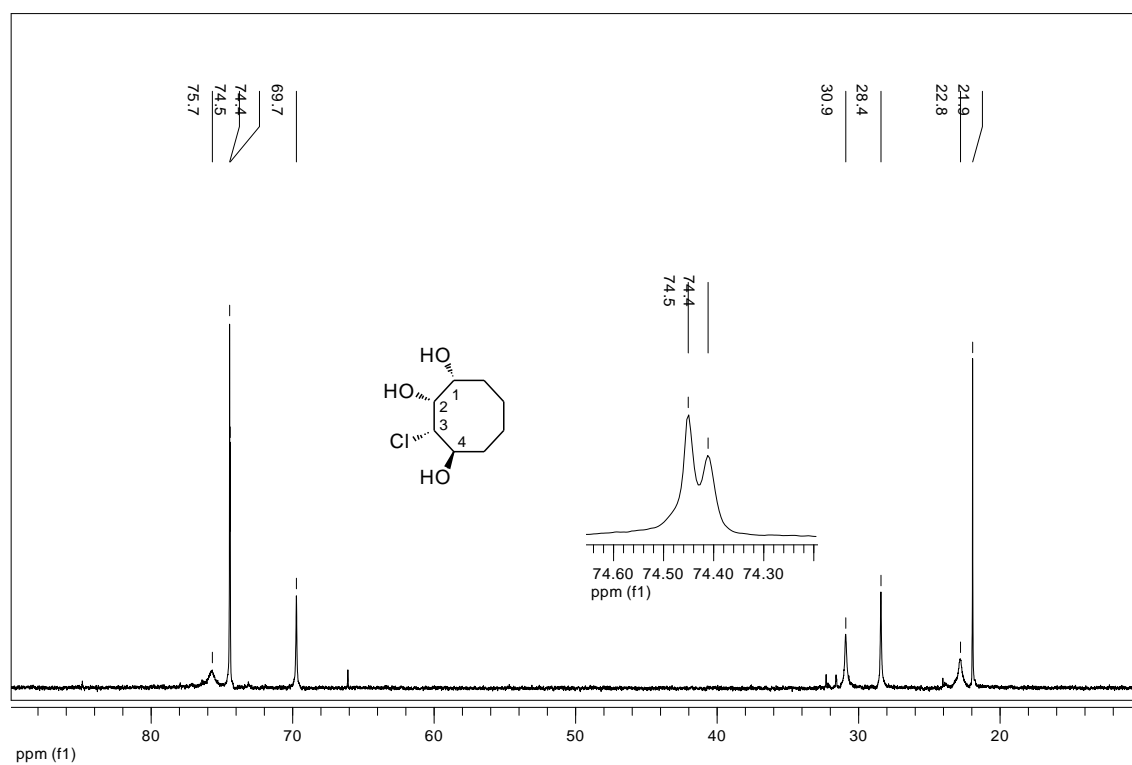

**(1*R*(*S*),2*R*(*S*),3*S*(*R*),4*S*(*R*))-4-Chlorocyclooctane-1,2,3-triyl triacetate (25):** CDCl<sub>3</sub> (<sup>1</sup>H NMR and <sup>13</sup>C NMR)

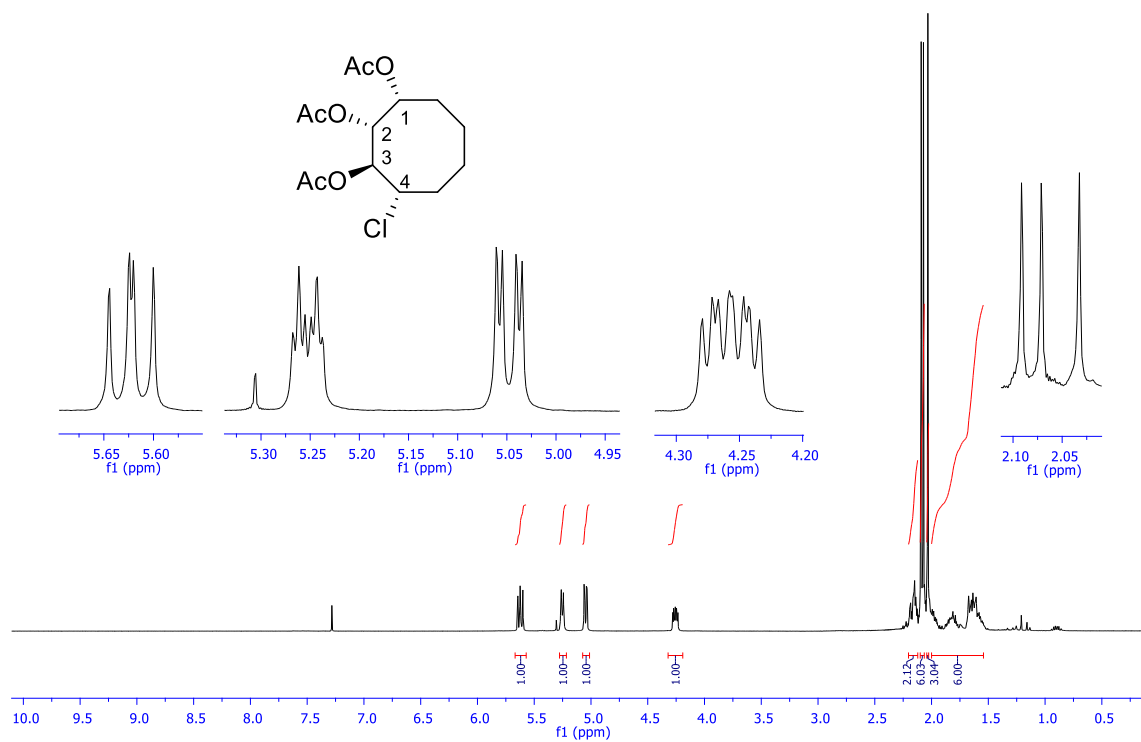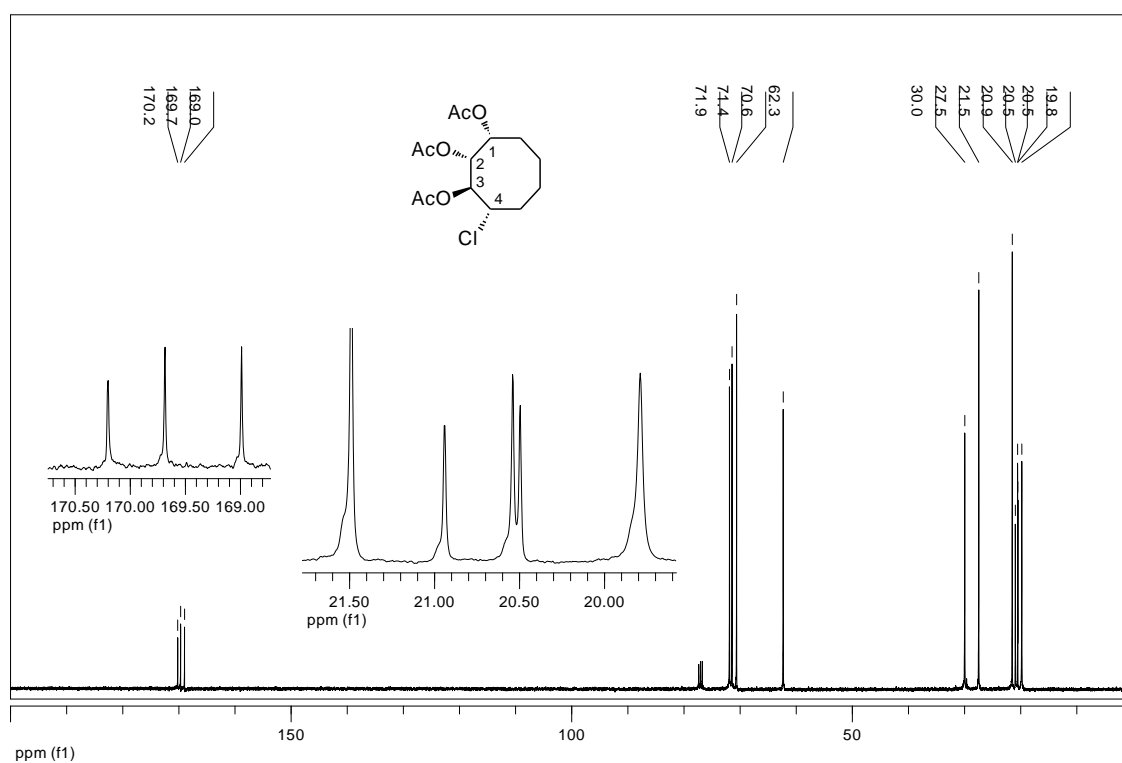

**1*R*(*S*),2*R*(*S*),3*S*(*R*),4*S*(*R*))-4-Chlorocyclooctane-1,2,3-triyl triacetate (25): CDCl<sub>3</sub>-HMQC**

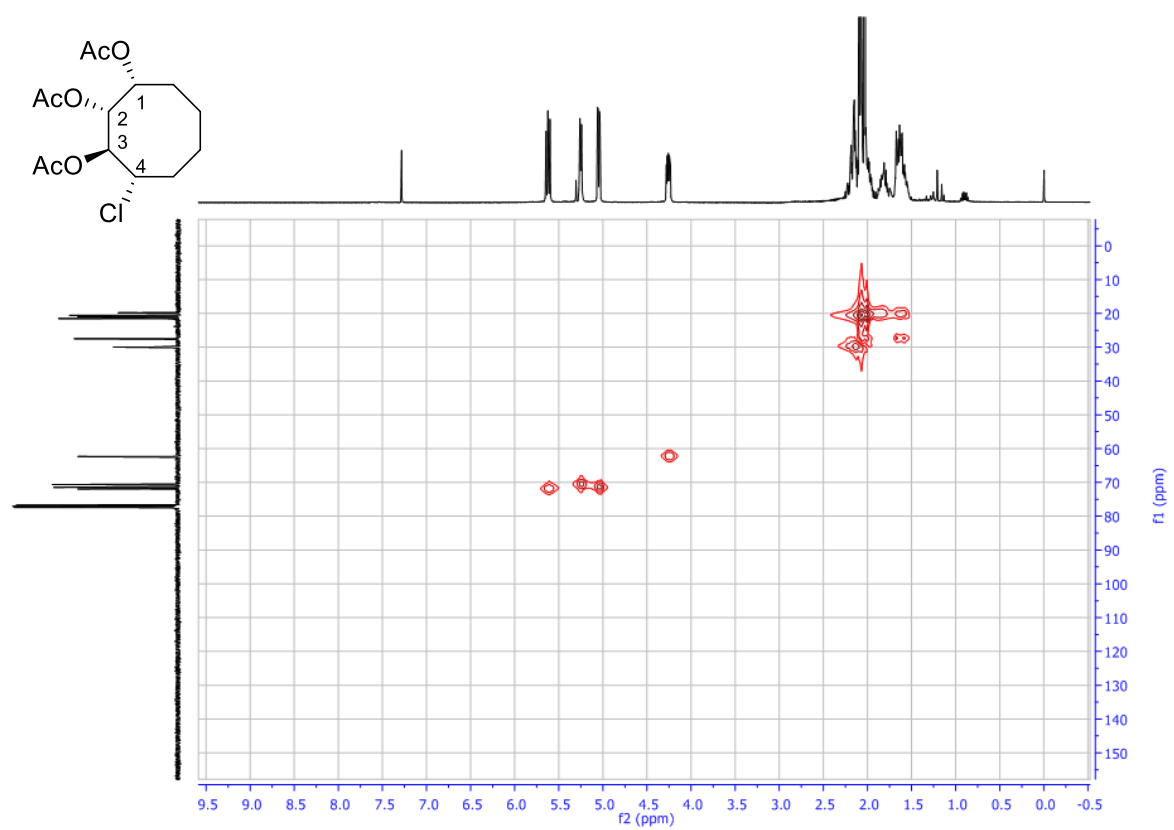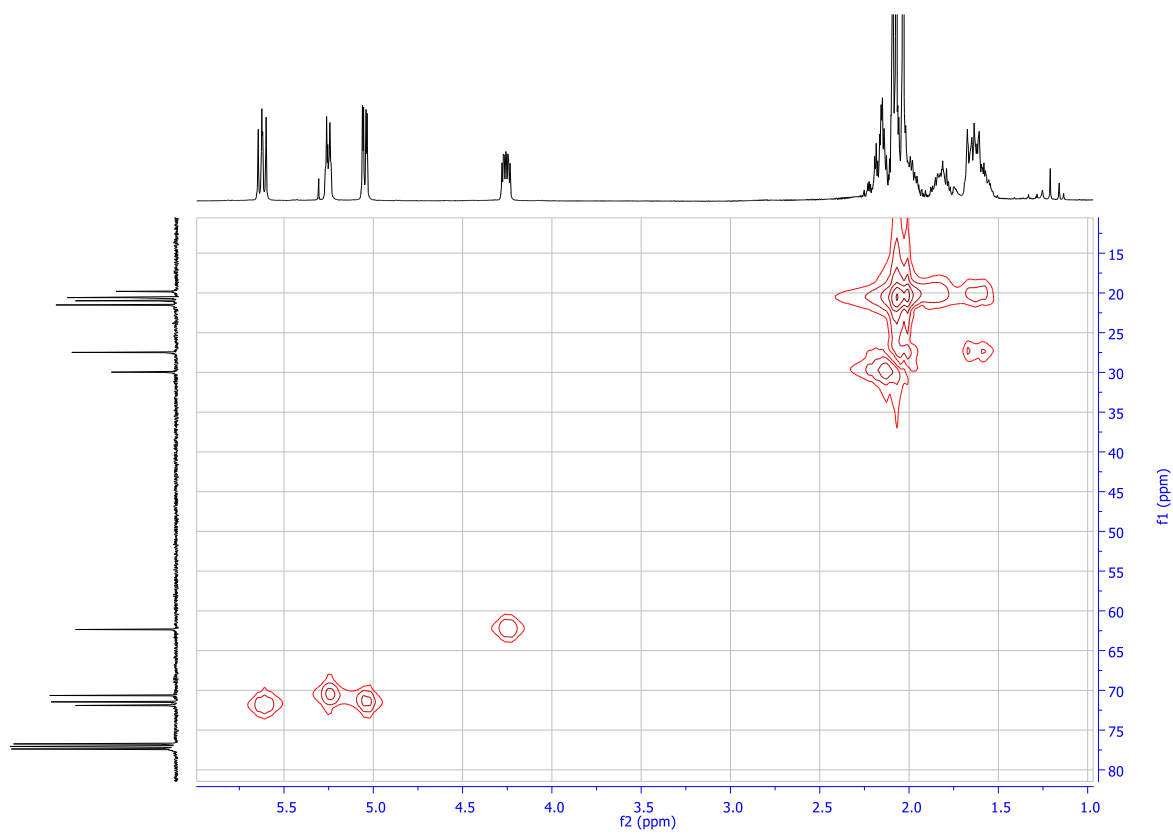



(1*R*(*S*),2*R*(*S*),3*S*(*R*),4*S*(*R*))-4-Chlorocyclooctane-1,2,3-triyl triacetate (**25**): CDCl<sub>3</sub>-COSY

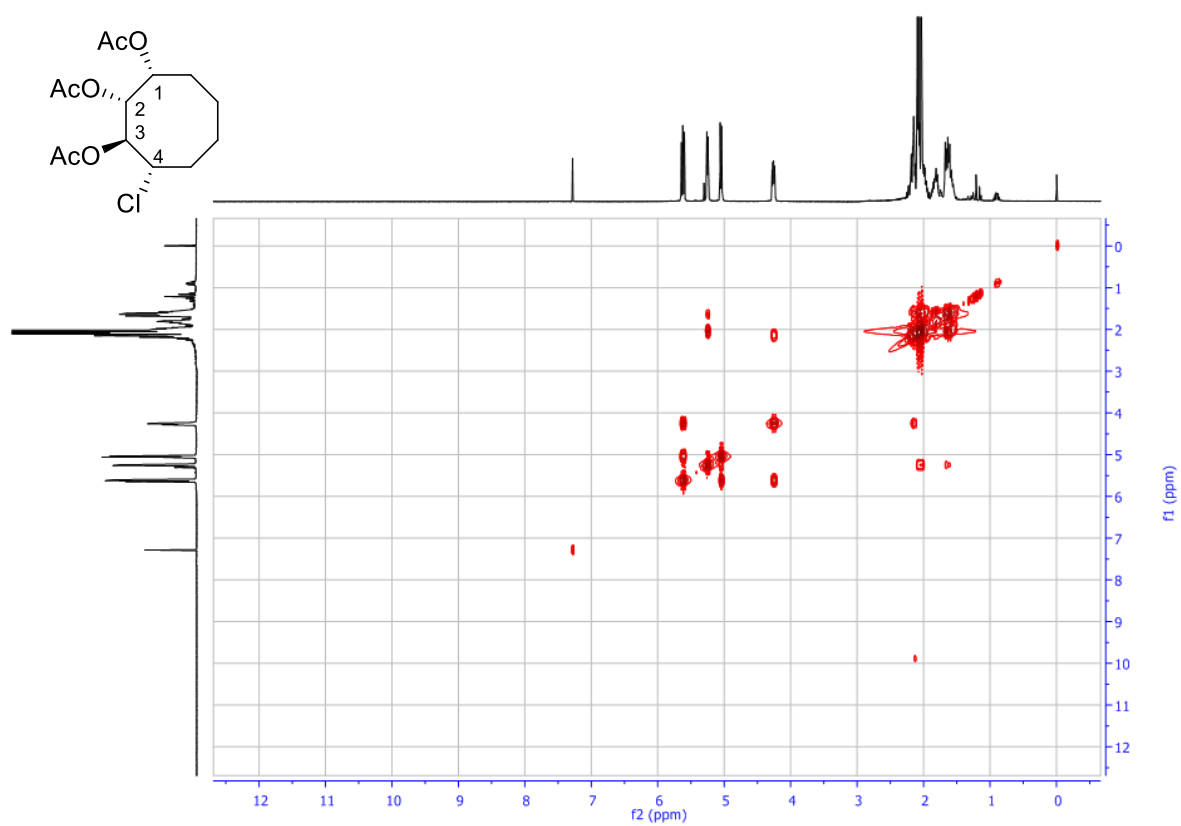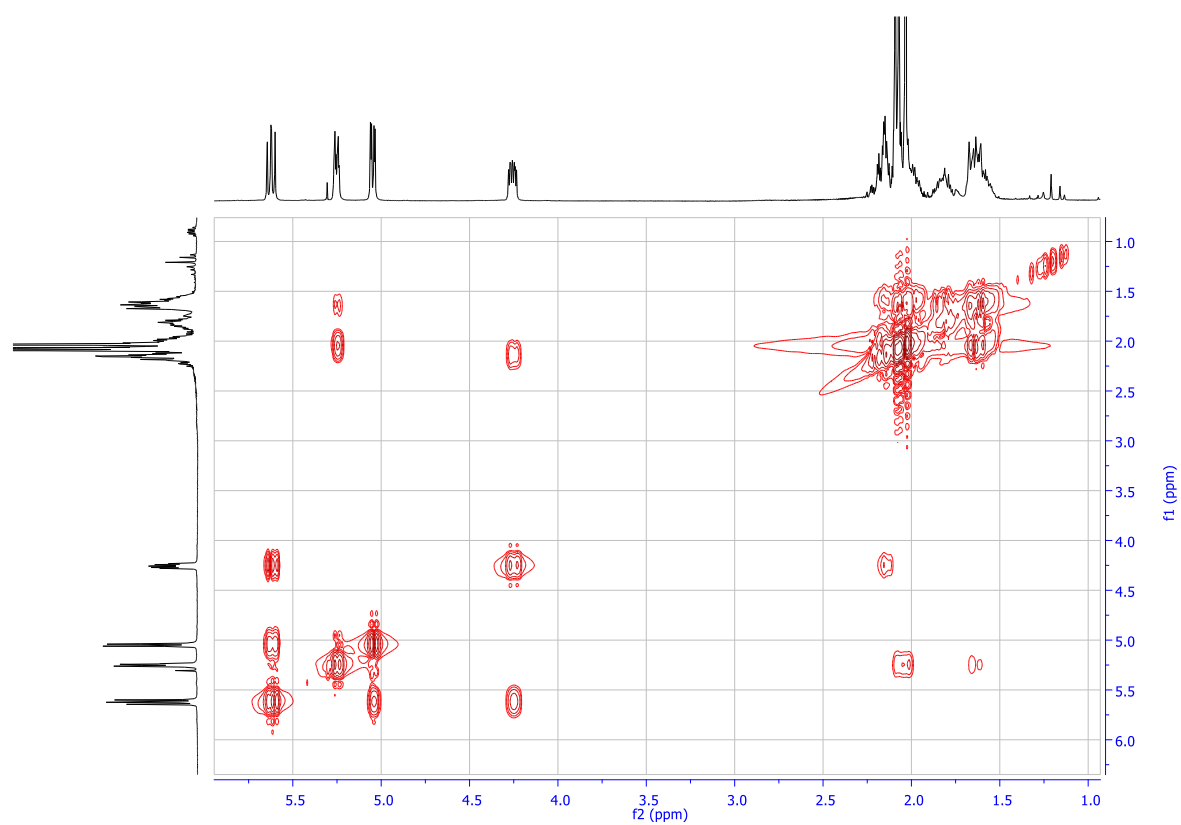

**(1*R*(*S*),2*R*(*S*),3*S*(*R*),4*R*(*S*))-3-Chlorocyclooctane-1,2,4-triyl triacetate (26):** CDCl<sub>3</sub> (<sup>1</sup>H NMR and <sup>13</sup>C NMR)

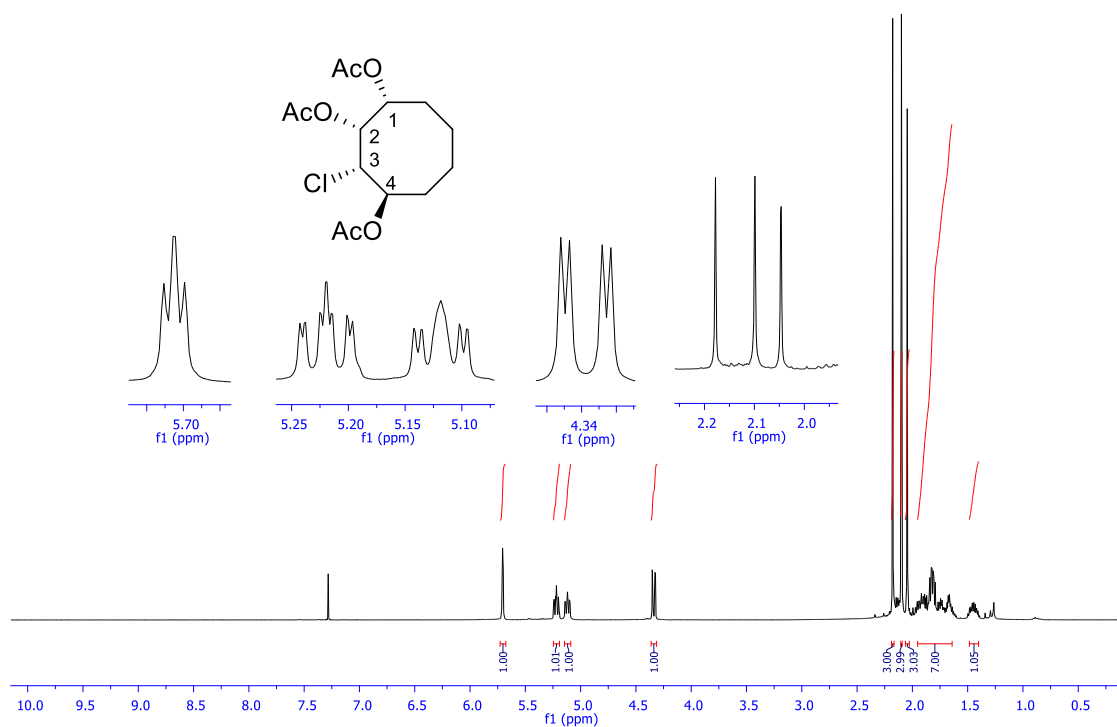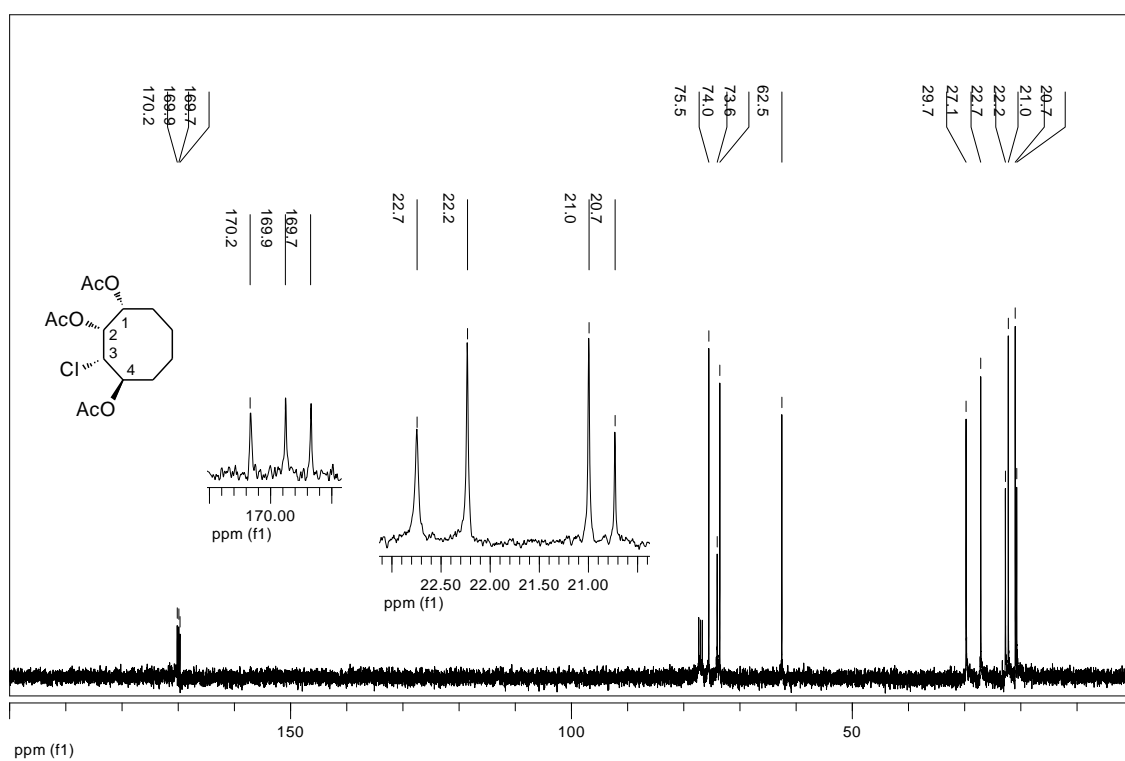

(1*R*(*S*),2*R*(*S*),3*S*(*R*),4*R*(*S*))-3-Chlorocyclooctane-1,2,4-triyl triacetate (26): CDCl<sub>3</sub>-HMQC

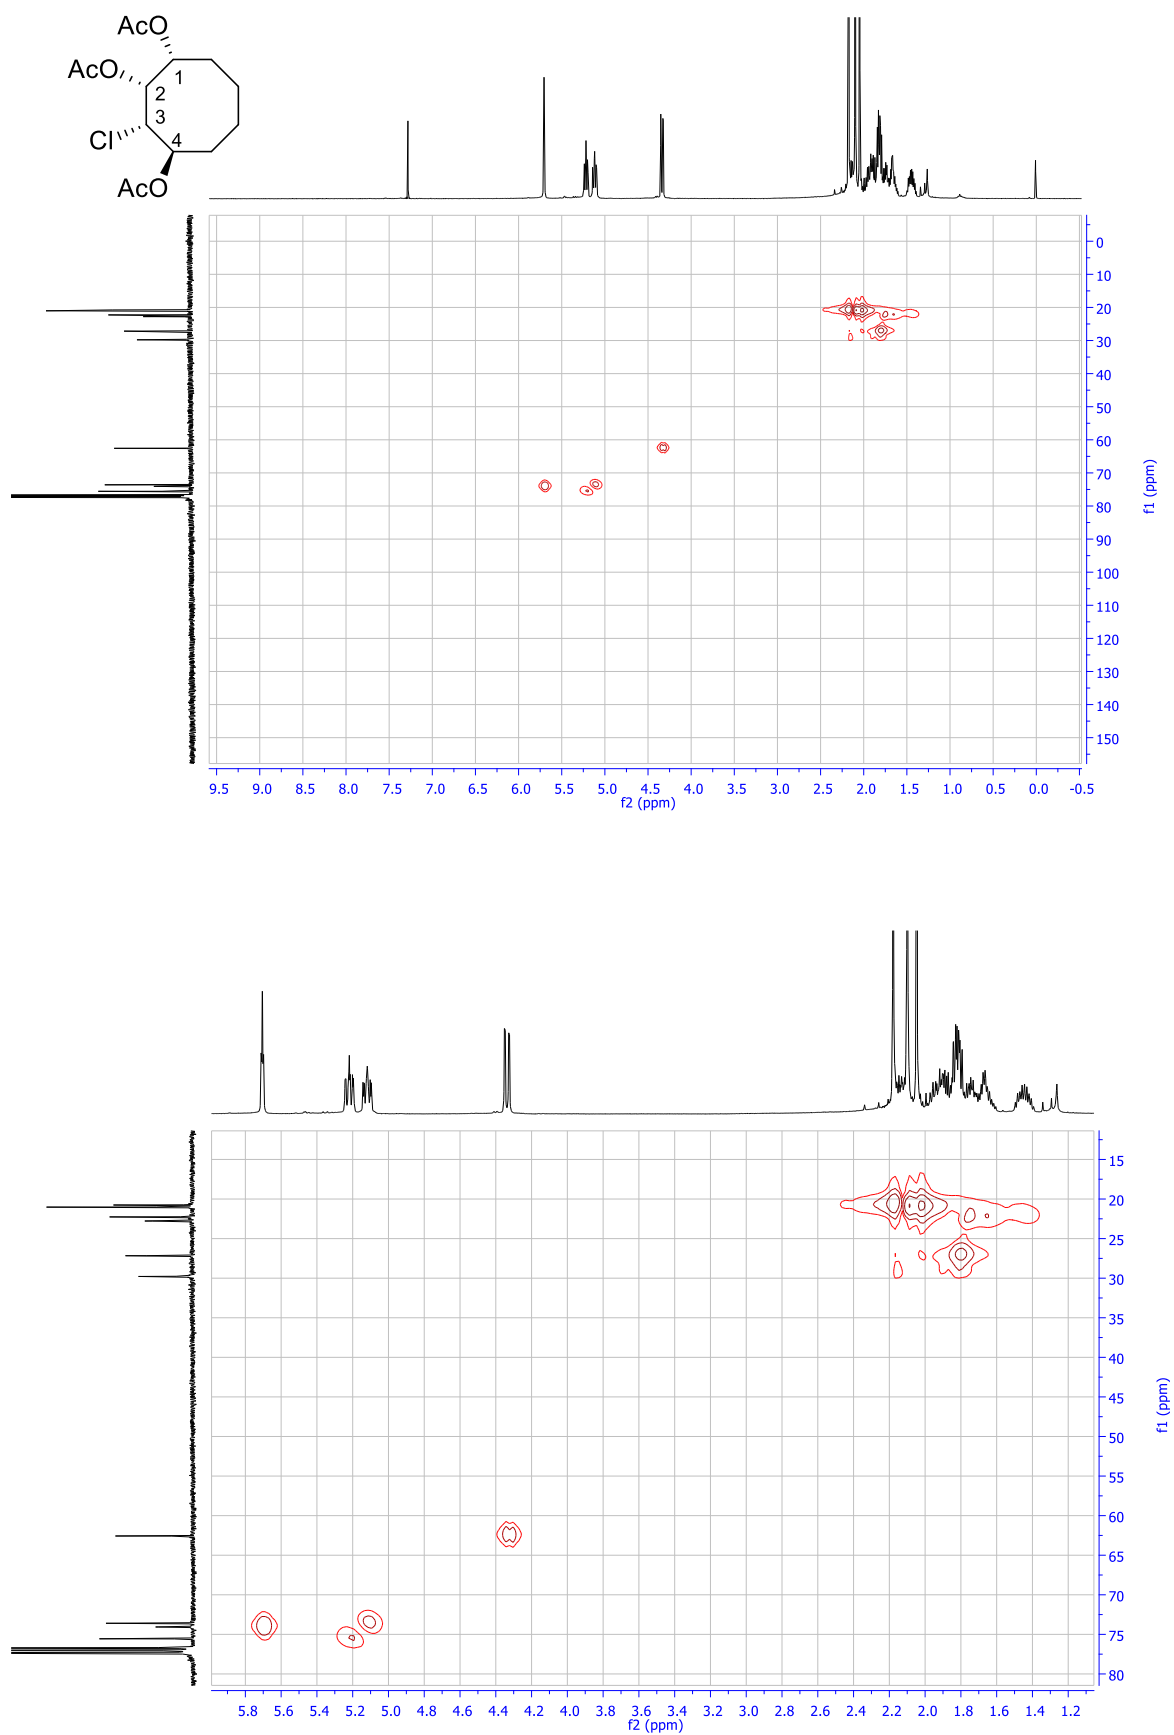

(1*R*(*S*),2*R*(*S*),3*S*(*R*),4*R*(*S*))-3-Chlorocyclooctane-1,2,4-triyl triacetate (**26**): CDCl<sub>3</sub>-COSY

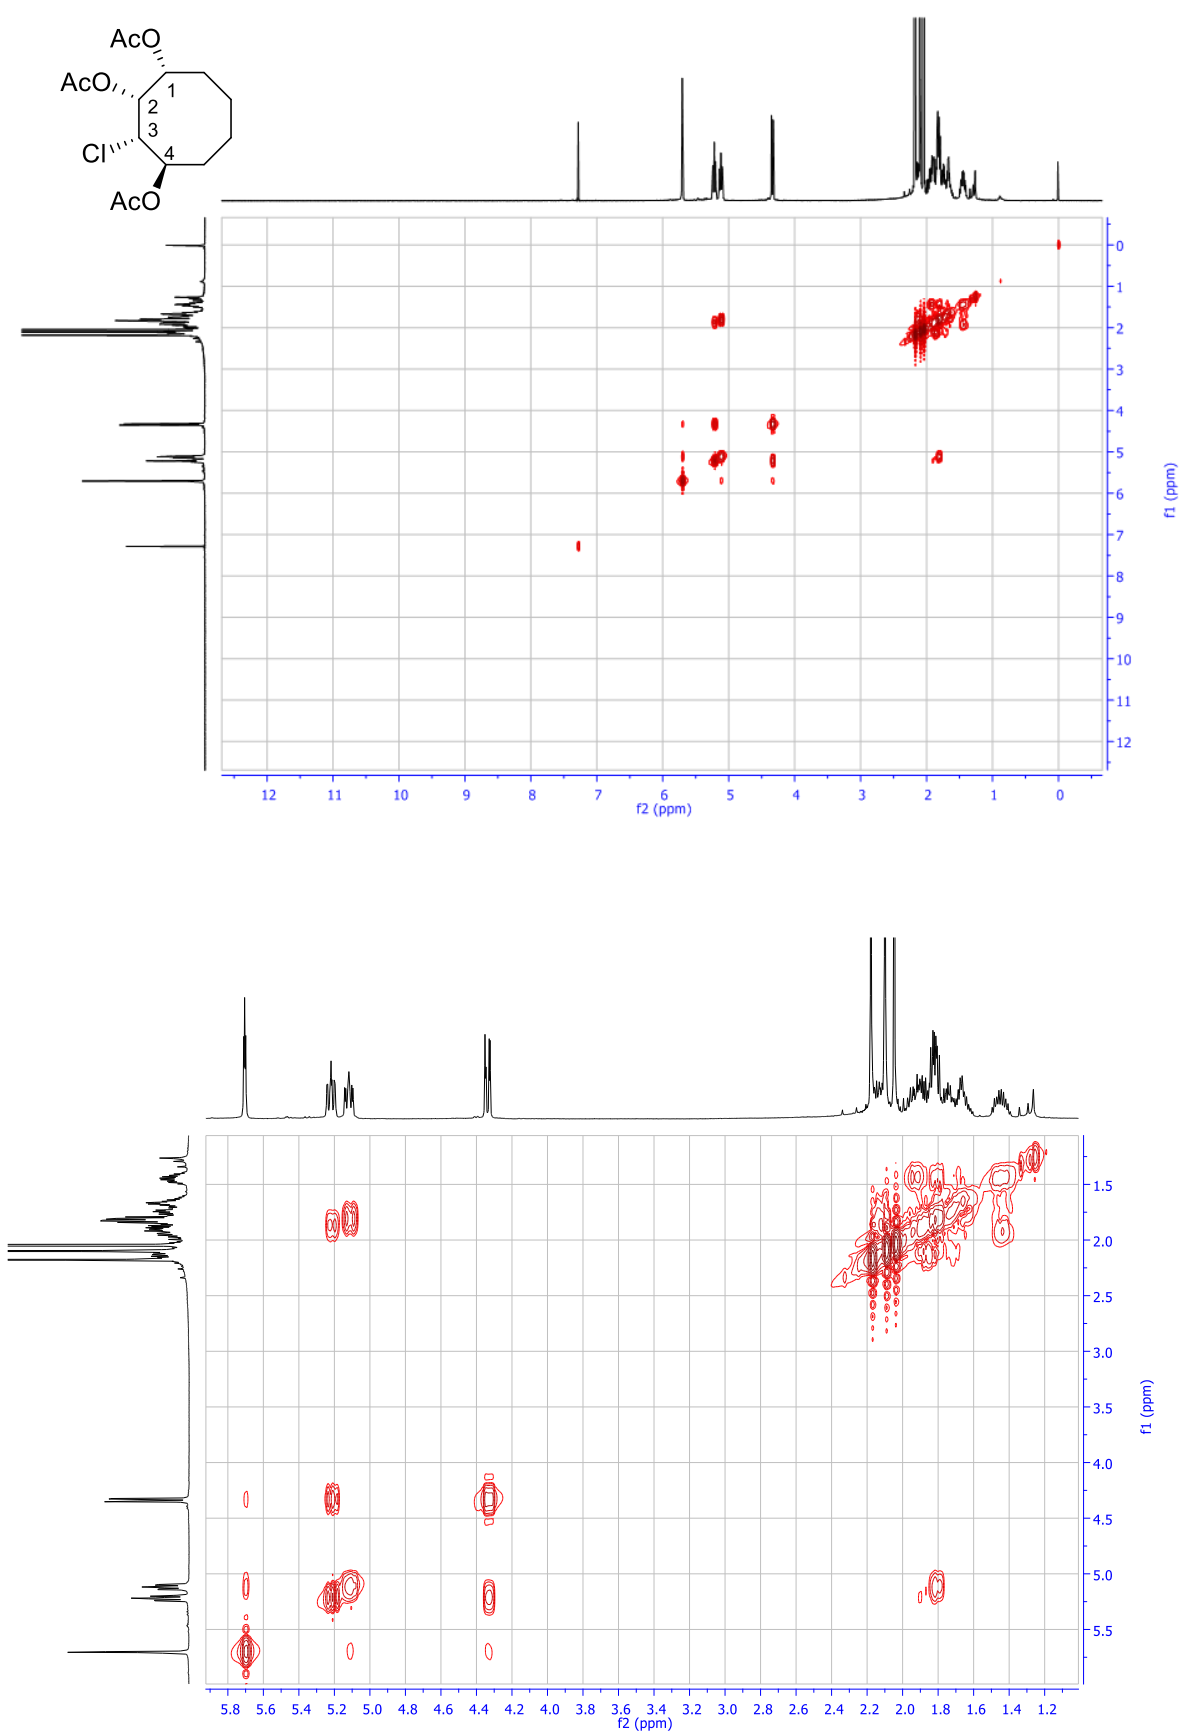

Supplement: Additional file 1 [file 1860-5397-17-59-S1.pdf]
